# Supplementary material for: Alcohol synthesis based on the SN2 reactions of alkyl halides with the squarate dianion
Source: Royal Society of Chemistry journal article supplement (doi:10.1039/d3ob01507f), 2024-01-01

## Electronic Supplementary Information

### Alcohol synthesis based on the S<sub>N</sub>2 reactions of alkyl halides with squarate dianion

Kazuto Sato,<sup>a</sup> Tomoyuki Fujita,<sup>a</sup> Takashi Takeuchi,<sup>a</sup> Takahiro Suzuki,<sup>b</sup> Kazutada Ikeuchi,<sup>b,§</sup> Keiji Tanino<sup>b\*</sup>

<sup>a</sup> Department of Chemistry, Faculty of Science, Hokkaido University, Sapporo 060-0810, Japan

<sup>b</sup> Graduate School of Chemical Sciences and Engineering, Hokkaido University, Sapporo 060-0810, Japan

<sup>§</sup> Present address: Graduate School of Pharmaceutical Sciences, Nagoya City University, 467-8603, Japan

E-mail: ktanino@sci.hokudai.ac.jp

#### Tables of Contents

|       |                                                                                     |     |
|-------|-------------------------------------------------------------------------------------|-----|
| ESI-1 | Optimization of base and solvent for the transformation of <b>1a</b> into <b>3a</b> | S1  |
| ESI-2 | General information                                                                 | S2  |
| ESI-3 | Experimental section                                                                | S3  |
| ESI-4 | NMR spectra of novel compounds                                                      | S19 |

## ESI-1. Optimization of base and solvent for the transformation of **1a** into **3a**

### 1. Screening of base

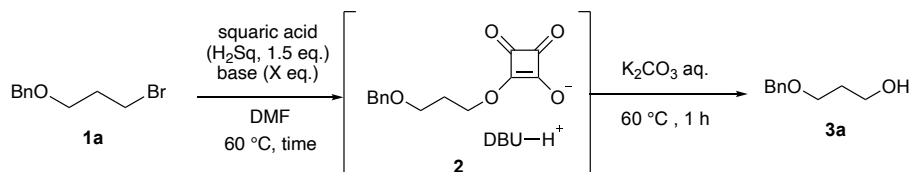

| entry | base (X eq.)                        | time (h) | yield of alcohol <b>3a</b> (%) | recovery of <b>1a</b> (%) |
|-------|-------------------------------------|----------|--------------------------------|---------------------------|
| 1     | $\text{Cs}_2\text{CO}_3$ (1.5)      | 5        | 26                             | 73                        |
| 2     | pyridine (3.0)                      | 5        | 20                             | 60                        |
| 3     | $\text{Et}_3\text{N}$ (3.0)         | 1        | 14 <sup>a</sup>                | 20 <sup>a</sup>           |
| 4     | $\text{K}_2\text{CO}_3$ (1.5)       | 0.5      | 6                              | 86                        |
| 5     | $\text{NaHCO}_3$ (3.0)              | 0.5      | 4                              | 87                        |
| 6     | <i>i</i> -Pr <sub>2</sub> NEt (3.0) | 0.5      | 27                             | 20                        |
| 7     | TMEDA (1.5)                         | 0.5      | 7                              | 43                        |
| 8     | KOH (3.0)                           | 0.5      | 6                              | 86                        |
| 9     | DBU (3.0)                           | 0.5      | 89                             | –                         |
| 10    | DBU (3.6)                           | 0.5      | 96                             | –                         |

<sup>a</sup> NMR yield

### 2. Screening of solvent

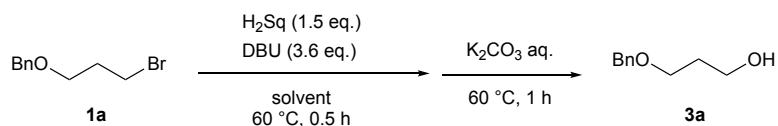

| entry | solvent | yield of alcohol <b>3a</b> (%) | recovery of <b>1a</b> (%) |
|-------|---------|--------------------------------|---------------------------|
| 1     | THF     | 43                             | 48                        |
| 2     | EtOH    | 54                             | 38                        |
| 3     | acetone | 20                             | –                         |
| 4     | DMSO    | 80                             | –                         |
| 4     | MeCN    | 82                             | –                         |
| 5     | DMF     | 96                             | –                         |

## ESI-2. General information

All reactions were carried out in flame- or oven-dried glassware under an argon atmosphere with dry solvents unless otherwise stated. The reactions heating to high temperatures were carried out using an oil bath unless otherwise stated. THF was distilled from sodium and benzophenone. Bis-tetra-*n*-propylammonium salt of squaric acid,<sup>1</sup> di-sodium salt of squaric acid,<sup>2</sup> compounds **1e**,<sup>3</sup> **1m**,<sup>4</sup> **1n**,<sup>5</sup> **1r**,<sup>6</sup> **1s**,<sup>7</sup> **5**,<sup>8</sup> and **8**<sup>9</sup> were prepared by the known procedures. A salt, as shown entry 4 in Table 1, was prepared by squaric acid and diazabicyclo[5.4.0]undecene (DBU) as a 1:2 mol ratio. All other reagents and solvents were used as received from commercial sources without further purification.

All reaction were monitored by thin-layer chromatography which was performed by using Merck silica gel 60 F254 pre-coated plates (0.25 mm) and visualized with UV (254 nm) and stained with a solution of 2% anisaldehyde, 5% H<sub>2</sub>SO<sub>4</sub> in ethanol or a solution of 10% phosphomolybdic acid in ethanol under heating at ca. 200 °C. Flash column chromatography was performed by using Kanto Silica Gel 60 N. IR spectra were recorded on JASCO FT/IR-4100 and the major absorbance bands are all reported in wavenumbers (cm<sup>-1</sup>). Preparative TLC (PTLC) was performed by using Merck silica gel 60 F254 pre-coated plates (0.5 mm). HRMS were recorded on a JEOL JMS-T100GCV at Research Faculty of Agriculture, Hokkaido University for FD/FI method. NMR spectra were recorded on JEOL JNM-ECX-500 (500 MHz for <sup>1</sup>H and 126 MHz for <sup>13</sup>C) with residual CHCl<sub>3</sub> of chloroform-*d* or benzene of benzene-*d*<sub>6</sub> as internal reference (<sup>1</sup>H NMR: 7.26 ppm for chloroform-*d*, 7.15 ppm for benzene-*d*<sub>6</sub>, <sup>13</sup>C NMR: 77.16 ppm for chloroform-*d*, 128.06 ppm for benzene-*d*<sub>6</sub>). Chemical shift was reported in part per million (ppm) and signals of <sup>1</sup>H NMR spectra were expressed as follows: singlet (s), doublet (d), triplet (t), quartet (q), quintet (quint) and multiplet (m).

- 
1. M. G. Topuzova, S. V. Kotov and T. M. Kolev, *Appl. Catal., A*, 2005, **281**, 157.
  2. Q. Zhao, J. Wang, Y. Lu, Y. Li, G. Liang and J. Chen, *Angew. Chem. Int. Ed.*, 2016, **55**, 12528.
  3. A. Itoh, T. Saito, K. Oshima and H. Nozaki, *Bull. Chem. Soc. Jpn.*, 1981, **54**, 1456.
  4. S. G. Hegde, D. Beckwith, R. Doti and J. Wolinsky, *J. Org. Chem.*, 1985, **50**, 894.
  5. M. Xuan, I. Paterson and S. M. Dalby, *Org. Lett.*, 2012, **14**, 5492.
  6. H. Zhao, A. J. McMillan, T. Constantin, R. C. Mykura, F. Juliá, and D. Leonori, *J. Am. Chem. Soc.*, 2021, **143**, 14806.
  7. I. Ryu, H. Matsubara, S. Yasuda, H. Nakamura, and D. P. Curran, *J. Am. Chem. Soc.*, 2002, **124**, 12946.
  8. K. Zhao and R. R. Knowles, *J. Am. Chem. Soc.*, 2022, **144**, 137.
  9. N. Saygili, R. J. Brown, P. Day, R. Hoelzl, P. Kathirgamanathan, E. R. Mageean, T. Ozturk, M. Pilkington, M. M. B. Qayyum, S. S. Turner, L. Vorwerg and J. D. Wallis, *Tetrahedron*, 2001, **57**, 5015.

### ESI-3. Experimental section

#### General synthetic procedure

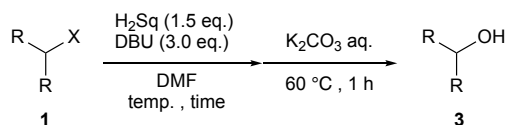

To a solution of **1** (1.0 eq.) and squaric acid (1.5 eq.) in DMF (ca. 0.5 M) was added DBU (3.0 eq.) at rt, and the reaction mixture was stirred at the optimized reaction temperature among 60–120 °C. After stirring for the reaction time corresponding to the substrate, 10% (w/w)  $\text{K}_2\text{CO}_3$  aq. (1 mL) was added. After stirring for 1 h at 60 °C, brine was added to the reaction mixture, and the aqueous mixture was extracted with EtOAc for three times. The combined organic layers were dried over  $\text{MgSO}_4$  and filtered. The filtrate was concentrated under reduced pressure to give a crude product. Purification of the crude product by silica gel column chromatography (hexane/EtOAc system) gave **3**. When the reaction protocol or the reaction conditions differed from the general procedure, the detailed information was mentioned in the procedures of each of synthesized compounds.

#### Synthesis of **3a** from bromide **1a**

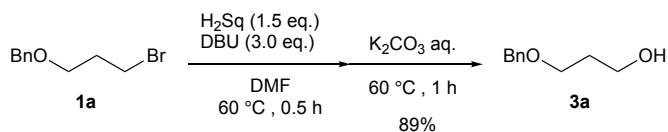

According to the general procedure, the reaction of **1a** (45.9 mg, 200  $\mu\text{mol}$ ) and  $\text{H}_2\text{Sq}$  (34.2 mg, 300  $\mu\text{mol}$ ) in DMF (400  $\mu\text{L}$ ) with DBU (89.7  $\mu\text{L}$ , 600  $\mu\text{mol}$ ) at 60 °C for 0.5 h, followed by the treatment of the mixture with 10% (w/w)  $\text{K}_2\text{CO}_3$  aq. (1 mL) at 60 °C for 1 h afforded a crude product including **3a**. Purification of the crude product by silica gel column chromatography (hexane/EtOAc = 3/1) gave **3a** (29.6 mg, 178  $\mu\text{mol}$ , 89%) as a colorless oil. The spectral data of **3a** was in good agreement with the literature data.<sup>10</sup>

#### Synthesis of **3a** from chloride **1b**

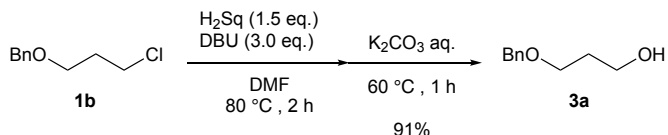

According to the general procedure, the reaction of **1b** (37.6 mg, 204  $\mu\text{mol}$ ) and  $\text{H}_2\text{Sq}$  (34.7 mg, 304  $\mu\text{mol}$ ) in DMF (410  $\mu\text{L}$ ) with DBU (91.4  $\mu\text{L}$ , 611  $\mu\text{mol}$ ) at 80 °C for 2 h, followed by the treatment of the mixture with 10% (w/w)  $\text{K}_2\text{CO}_3$  aq. (1 mL) at 60 °C for 1 h afforded a crude product including **3a**. Purification of the crude product by silica gel column chromatography (hexane/EtOAc = 3/1) gave **3a** (30.6 mg, 184  $\mu\text{mol}$ , 91%) as a colorless oil. The spectral data of **3a** was in good agreement with the literature data.<sup>10</sup>

10. L. V. Heumann and G. E. Keck, *Org. Lett.*, 2007, **9**, 1951.



### Synthesis of **3a** from dialkyl squarate **4**

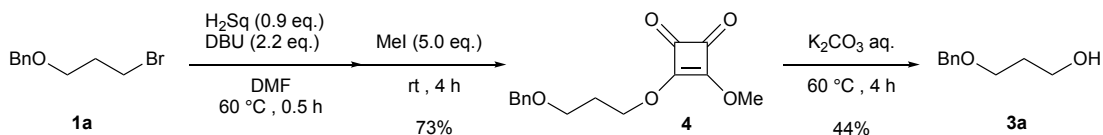

To a solution of **1a** (100 mg, 436  $\mu\text{mol}$ ) and  $\text{H}_2\text{Sq}$  (44.1 mg, 387  $\mu\text{mol}$ ) in DMF (870  $\mu\text{L}$ ) was added DBU (141  $\mu\text{L}$ , 944  $\mu\text{mol}$ ). After stirring for 0.5 h at 60  $^\circ\text{C}$ , MeI (136  $\mu\text{L}$ , 2.18 mmol) was added at 0  $^\circ\text{C}$ . After stirring for 4 h at rt,  $\text{H}_2\text{O}$  (1 mL) was added to the reaction mixture, and the aqueous mixture was extracted with EtOAc (5 mL  $\times$  3). The organic layer was dried over  $\text{MgSO}_4$  and filtered. The filtrate was concentrated under reduced pressure to give a crude product, which was purified by silica gel column chromatography (hexane/EtOAc = 4/1) to give **4** (78.7 mg, 285  $\mu\text{mol}$ , 73%) as a yellow oil.

A mixture of **4** (28.1 mg, 123  $\mu\text{mol}$ ) in 10% (w/w)  $\text{K}_2\text{CO}_3$  aq. (1 mL) was stirred for 4 h at 60  $^\circ\text{C}$ . Then, the reaction mixture was extracted with EtOAc (1 mL  $\times$  3). The organic layer was dried over  $\text{MgSO}_4$  and filtered. The filtrate was concentrated under reduced pressure to give a crude product, which was purified by silica gel column chromatography (hexane/EtOAc = 4/1) to give **3a** (8.9 mg, 53.5  $\mu\text{mol}$ , 44%) as a colorless oil. The spectral data of **3a** was in good agreement with the literature data.<sup>10</sup>

Data for **4**: IR (ATR): 2961, 2866, 1812, 1732, 1601, 1476, 1454, 1395, 1361, 1340, 1100, 1026, 917, 823, 741, 700  $\text{cm}^{-1}$ .  $^1\text{H}$  NMR ( $\text{CDCl}_3$ , 500 MHz):  $\delta$  = 7.37–7.23 (m, 5H), 4.79 (t,  $J$  = 6.0 Hz, 2H), 4.49 (s, 2H), 4.30 (s, 3H), 3.60 (t,  $J$  = 6.0 Hz, 2H), 2.09 (quint,  $J$  = 6.0 Hz, 2H).  $^{13}\text{C}$  NMR ( $\text{CDCl}_3$ , 126 MHz): 189.30, 189.25, 184.5, 184.3, 138.1, 128.5 (2C), 127.9 (2C), 127.8, 73.2, 71.9, 65.7, 61.0, 30.2. HRMS (FD):  $m/z$   $[\text{M}]^+$  calcd for  $\text{C}_{15}\text{H}_{16}\text{O}_5$ : 276.0998; found: 276.0993.

### Synthesis of **3c** from bromide **1c**

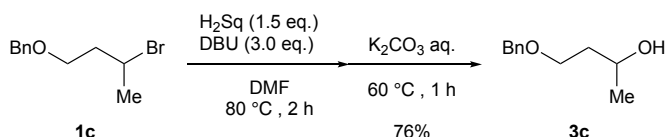

According to the general procedure, the reaction of **1c** (49.1 mg, 202  $\mu\text{mol}$ ) and  $\text{H}_2\text{Sq}$  (34.5 mg, 302  $\mu\text{mol}$ ) in DMF (400  $\mu\text{L}$ ) with DBU (90.6  $\mu\text{L}$ , 606  $\mu\text{mol}$ ) at 80  $^\circ\text{C}$  for 2 h, followed by the treatment of the mixture with 10% (w/w)  $\text{K}_2\text{CO}_3$  aq. (1 mL) at 60  $^\circ\text{C}$  for 1 h afforded a crude product including **3c**. Purification of the crude product by silica gel column chromatography (hexane/EtOAc = 3/1) gave **3c** (27.6 mg, 153  $\mu\text{mol}$ , 76%) as a colorless oil. The spectral data of **3c** was in good agreement with the literature data.<sup>11</sup>

11. C. Cadot, P. I. Dalko, J. Cossy, C. Ollivier, R. Chuard, and P. Renaud, *J. Org. Chem.*, 2002, **67**, 7193.

#### Synthesis of **3c** from chloride **1d**

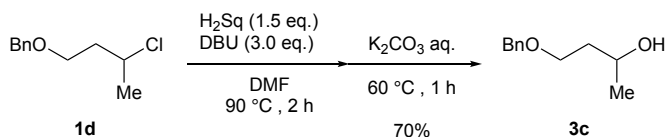

According to the general procedure, the reaction of **1d** (39.6 mg, 199  $\mu\text{mol}$ ) and  $\text{H}_2\text{Sq}$  (34.1 mg, 299  $\mu\text{mol}$ ) in DMF (400  $\mu\text{L}$ ) with DBU (89.4  $\mu\text{L}$ , 598  $\mu\text{mol}$ ) at 90 °C for 2 h, followed by the treatment of the mixture with 10% (w/w)  $\text{K}_2\text{CO}_3$  aq. (1 mL) at 60 °C for 1 h afforded a crude product including **3c**. Purification of the crude product by silica gel column chromatography (hexane/EtOAc = 3/1) gave **3c** (25.1 mg, 139  $\mu\text{mol}$ , 70%) as a colorless oil. The spectral data of **3c** was in good agreement with the literature data.<sup>11</sup>

#### Synthesis of **3e** from chloride **1e**

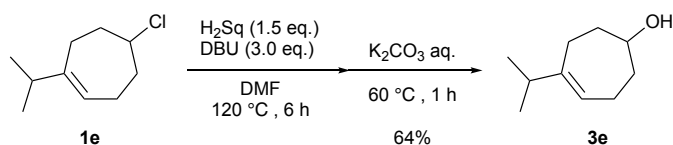

According to the general procedure, the reaction of **1e** (18.4 mg, 107  $\mu\text{mol}$ ) and  $\text{H}_2\text{Sq}$  (18.1 mg, 159  $\mu\text{mol}$ ) in DMF (210  $\mu\text{L}$ ) with DBU (47.9  $\mu\text{L}$ , 320  $\mu\text{mol}$ ) at 120 °C for 6 h, followed by the treatment of the mixture with 10% (w/w)  $\text{K}_2\text{CO}_3$  aq. (1 mL) at 60 °C for 1 h afforded a crude product including **3e**. Purification of the crude product by silica gel column chromatography (hexane/EtOAc = 3/1) gave **3e** (10.5 mg, 68.1  $\mu\text{mol}$ , 64%) as a colorless oil.

Data for **3e**: IR (ATR): 3342, 2957, 2927, 2853, 1463, 1361, 1293, 1035, 829  $\text{cm}^{-1}$ .  $^1\text{H}$  NMR ( $\text{CDCl}_3$ , 500 MHz):  $\delta$  = 5.52 (t,  $J$  = 6.6 Hz, 1H), 3.81–3.75 (m, 1H), 2.24–2.13 (m, 3H), 1.96–1.87 (m, 4H), 1.34–1.26 (m, 2H), 0.97 (d,  $J$  = 6.9, 3H), 0.96 (d,  $J$  = 6.9, 3H).  $^{13}\text{C}$  NMR ( $\text{CDCl}_3$ , 126 MHz): 150.1, 122.6, 74.8, 37.1, 35.9, 35.8, 24.5, 22.5, 21.4, 21.2. HRMS (FI):  $m/z$  [ $\text{M}$ ] $^+$  calcd for  $\text{C}_{10}\text{H}_{18}\text{O}$ : 154.1358; found: 154.1365.

#### Synthesis of **3f** from bromide **1f**

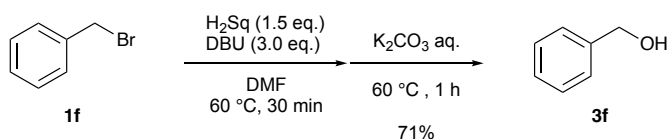

According to the general procedure, the reaction of **1f** (34.3 mg, 200  $\mu\text{mol}$ ) and  $\text{H}_2\text{Sq}$  (34.2 mg, 301  $\mu\text{mol}$ ) in DMF (400  $\mu\text{L}$ ) with DBU (89.7  $\mu\text{L}$ , 600  $\mu\text{mol}$ ) at 60 °C for 0.5 h, followed by the treatment of the mixture with 10% (w/w)  $\text{K}_2\text{CO}_3$  aq. (1 mL) at 60 °C for 1 h afforded a crude product including **3f**. Purification of the crude product by silica gel column chromatography (hexane/EtOAc = 3/1) gave **3f** (15.4 mg, 142  $\mu\text{mol}$ , 71%) as a colorless oil. The spectral data of **3f** was in good agreement with the literature data.<sup>12</sup>

12. P. Bhattacharya, J. A. Krause, and H. Guan, *Organometallics*, 2011, **30**, 4720.

#### Synthesis of **3g** from chloride **1g**

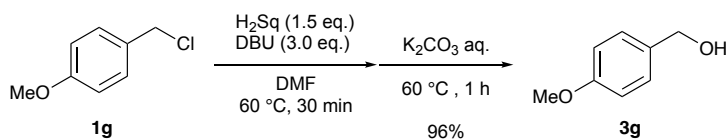

According to the general procedure, the reaction of **1g** (31.1 mg, 200  $\mu\text{mol}$ ) and  $\text{H}_2\text{Sq}$  (34.2 mg, 300  $\mu\text{mol}$ ) in DMF (400  $\mu\text{L}$ ) with DBU (89.7  $\mu\text{L}$ , 600  $\mu\text{mol}$ ) at 60 °C for 0.5 h, followed by the treatment of the mixture with 10% (w/w)  $\text{K}_2\text{CO}_3$  aq. (1 mL) at 60 °C for 1 h afforded a crude product including **3g**. Purification of the crude product by silica gel column chromatography (hexane/EtOAc = 3/1) gave **3g** (26.6 mg, 193  $\mu\text{mol}$ , 96%) as a white solid. The spectral data of **3g** was in good agreement with the literature data.<sup>12</sup>

#### Synthesis of **3h** from bromide **1h**

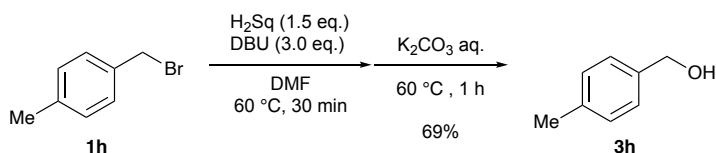

According to the general procedure, the reaction of **1h** (36.5 mg, 197  $\mu\text{mol}$ ) and  $\text{H}_2\text{Sq}$  (34.4 mg, 301  $\mu\text{mol}$ ) in DMF (400  $\mu\text{L}$ ) with DBU (89.7  $\mu\text{L}$ , 600  $\mu\text{mol}$ ) at 60 °C for 0.5 h, followed by the treatment of the mixture with 10% (w/w)  $\text{K}_2\text{CO}_3$  aq. (1 mL) at 60 °C for 1 h afforded a crude product including **3h**. Purification of the crude product by silica gel column chromatography (hexane/EtOAc = 3/1) gave **3h** (16.8 mg, 134  $\mu\text{mol}$ , 69%) as a white solid. The spectral data of **3h** was in good agreement with the literature data.<sup>12</sup>

#### Synthesis of **3i** from bromide **1i**

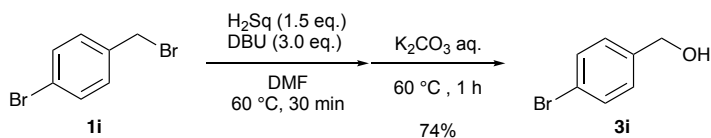

According to the general procedure, the reaction of **1i** (50.0 mg, 200  $\mu\text{mol}$ ) and  $\text{H}_2\text{Sq}$  (34.1 mg, 299  $\mu\text{mol}$ ) in DMF (400  $\mu\text{L}$ ) with DBU (89.7  $\mu\text{L}$ , 600  $\mu\text{mol}$ ) at 60 °C for 0.5 h, followed by the treatment of the mixture with 10% (w/w)  $\text{K}_2\text{CO}_3$  aq. (1 mL) at 60 °C for 1 h afforded a crude product including **3i**. Purification of the crude product by silica gel column chromatography (hexane/EtOAc = 3/1) gave **3i** (27.7 mg, 148  $\mu\text{mol}$ , 74%) as a white solid. The spectral data of **3i** was in good agreement with the literature data.<sup>13</sup>

---

13. A. Harinath, J. Bhattacharjee, T. K. Panda, *Chem. Commun.*, 2019, **55**, 1386.

#### Synthesis of **3j** from bromide **1j**

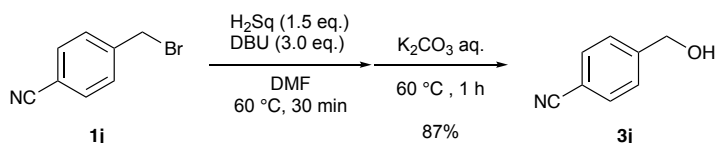

According to the general procedure, the reaction of **1j** (39.1 mg, 199  $\mu\text{mol}$ ) and  $\text{H}_2\text{Sq}$  (34.0 mg, 298  $\mu\text{mol}$ ) in DMF (400  $\mu\text{L}$ ) with DBU (89.7  $\mu\text{L}$ , 600  $\mu\text{mol}$ ) at 60 °C for 0.5 h, followed by the treatment of the mixture with 10% (w/w)  $\text{K}_2\text{CO}_3$  aq. (1 mL) at 60 °C for 1 h afforded a crude product including **3j**. Purification of the crude product by silica gel column chromatography (hexane/EtOAc = 2/1) gave **3j** (23.2 mg, 174  $\mu\text{mol}$ , 87%) as a white solid. The spectral data of **3j** was in good agreement with the literature data.<sup>14</sup>

#### Synthesis of **3k** from bromide **1k**

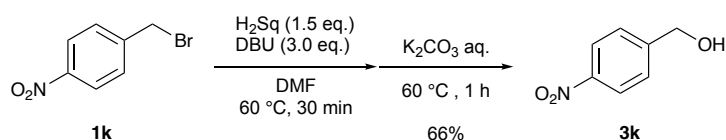

According to the general procedure, the reaction of **1k** (43.1 mg, 200  $\mu\text{mol}$ ) and  $\text{H}_2\text{Sq}$  (34.2 mg, 300  $\mu\text{mol}$ ) in DMF (400  $\mu\text{L}$ ) with DBU (89.7  $\mu\text{L}$ , 600  $\mu\text{mol}$ ) at 60 °C for 0.5 h, followed by the treatment of the mixture with 10% (w/w)  $\text{K}_2\text{CO}_3$  aq. (1 mL) at 60 °C for 1 h afforded a crude product including **3k**. Purification of the crude product by silica gel column chromatography (hexane/EtOAc = 2/1) gave **3k** (20.2 mg, 132  $\mu\text{mol}$ , 66%) as a yellow solid. The spectral data of **3k** was in good agreement with the literature data.<sup>13</sup>

#### Synthesis of **3l** from bromide **1l**

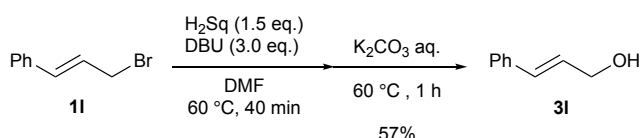

According to the general procedure, the reaction of **1l** (38.4 mg, 195  $\mu\text{mol}$ ) and  $\text{H}_2\text{Sq}$  (33.6 mg, 295  $\mu\text{mol}$ ) in DMF (390  $\mu\text{L}$ ) with DBU (87.5  $\mu\text{L}$ , 585  $\mu\text{mol}$ ) at 60 °C for 40 min, followed by the treatment of the mixture with 10% (w/w)  $\text{K}_2\text{CO}_3$  aq. (1 mL) at 60 °C for 1 h afforded a crude product including **3l**. Purification of the crude product by silica gel column chromatography (hexane/EtOAc = 3/1) gave **3l** (14.8 mg, 110  $\mu\text{mol}$ , 57%) as a white solid. The spectral data of **3l** was in good agreement with the literature data.<sup>15</sup>

14. M. Zhao, W. Xie, and C. Cui, *Chem. Eur. J.*, 2014, **20**, 9259.

15. K. Zhu, M. P. Shaver, and S. P. Thomas, *Eur. J. Org. Chem.*, 2015, 2119.

#### Synthesis of **3m** from chloride **1m**

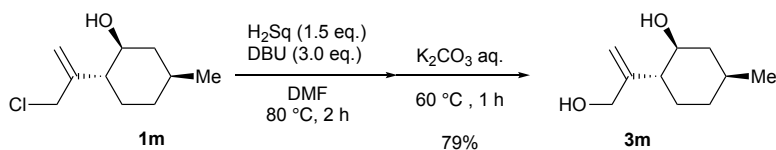

According to the general procedure, the reaction of **1m** (37.3 mg, 198  $\mu\text{mol}$ ) and  $\text{H}_2\text{Sq}$  (33.9 mg, 297  $\mu\text{mol}$ ) in DMF (400  $\mu\text{L}$ ) with DBU (88.7  $\mu\text{L}$ , 593  $\mu\text{mol}$ ) at 80 °C for 2 h, followed by the treatment of the mixture with 10% (w/w)  $\text{K}_2\text{CO}_3$  aq. (1 mL) at 60 °C for 1 h afforded a crude product including **3m**. Purification of the crude product by silica gel column chromatography (hexane/EtOAc = 1/2) gave **3m** (26.5 mg, 156  $\mu\text{mol}$ , 79%) as a white solid. The spectral data of **3m** was in good agreement with the literature data.<sup>16</sup>

#### Synthesis of **3n** from chloride **1n**

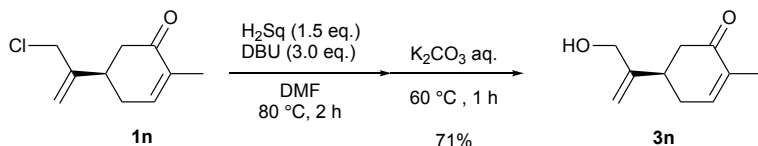

According to the general procedure, the reaction of **1n** (39.0 mg, 211  $\mu\text{mol}$ ) and  $\text{H}_2\text{Sq}$  (35.9 mg, 315  $\mu\text{mol}$ ) in DMF (420  $\mu\text{L}$ ) with DBU (94.8  $\mu\text{L}$ , 634  $\mu\text{mol}$ ) at 80 °C for 2 h, followed by the treatment of the mixture with 10% (w/w)  $\text{K}_2\text{CO}_3$  aq. (1 mL) at 60 °C for 1 h afforded a crude product including **3n**. Purification of the crude product by silica gel column chromatography (hexane/EtOAc = 1/1) gave **3n** (24.8 mg, 149  $\mu\text{mol}$ , 71%) as a yellow oil. The spectral data of **3n** was in good agreement with the literature data.<sup>5</sup>

#### Synthesis of **3o** from chloride **1o**

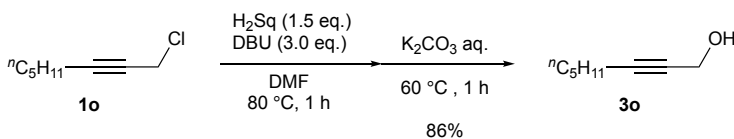

According to the general procedure, the reaction of **1o** (28.9 mg, 200  $\mu\text{mol}$ ) and  $\text{H}_2\text{Sq}$  (34.2 mg, 300  $\mu\text{mol}$ ) in DMF (400  $\mu\text{L}$ ) with DBU (89.7  $\mu\text{L}$ , 600  $\mu\text{mol}$ ) at 80 °C for 1 h, followed by the treatment of the mixture with 10% (w/w)  $\text{K}_2\text{CO}_3$  aq. (1 mL) at 60 °C for 1 h afforded a crude product including **3o**. Purification of the crude product by silica gel column chromatography (hexane/EtOAc = 3/1) gave **3o** (21.7 mg, 172  $\mu\text{mol}$ , 86%) as a yellow oil. The spectral data of **3o** was in good agreement with the literature data.<sup>17</sup>

16. N. A. Clanton, N. A. Wilson, E. Ortiz, S. T. Blumberg, and D. E. Frantz, *Org. Lett.*, 2023, **25**, 277.

17. A. Gansäuer, C.-A. Fan, F. Keller, and J. Keil, *J. Am. Chem. Soc.*, 2007, **129**, 3484.

#### Synthesis of **3p** from iodochloride **1p**

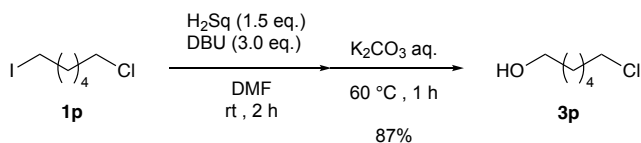

According to the general procedure, the reaction of **1p** (31.0 mg, 200  $\mu\text{mol}$ ) and  $\text{H}_2\text{Sq}$  (34.5 mg, 302  $\mu\text{mol}$ ) in DMF (400  $\mu\text{L}$ ) with DBU (89.7  $\mu\text{L}$ , 600  $\mu\text{mol}$ ) at rt for 2 h, followed by the treatment of the mixture with 10% (w/w)  $\text{K}_2\text{CO}_3$  aq. (1 mL) at 60 °C for 1 h afforded a crude product including **3p**. Purification of the crude product by silica gel column chromatography (hexane/EtOAc = 5/1) gave **3p** (23.9 mg, 175  $\mu\text{mol}$ , 87%) as a pale yellow oil. The spectral data of **3p** was in good agreement with the literature data.<sup>18</sup>

#### Synthesis of **3q** from bromochloride **1q**

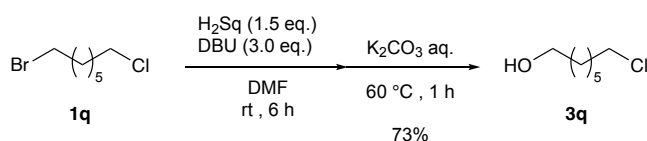

According to the general procedure, the reaction of **1q** (44.1 mg, 200  $\mu\text{mol}$ ) and  $\text{H}_2\text{Sq}$  (34.2 mg, 300  $\mu\text{mol}$ ) in DMF (400  $\mu\text{L}$ ) with DBU (89.7  $\mu\text{L}$ , 600  $\mu\text{mol}$ ) at rt for 6 h, followed by the treatment of the mixture with 10% (w/w)  $\text{K}_2\text{CO}_3$  aq. (1 mL) at 60 °C for 1 h afforded a crude product including **3q**. Purification of the crude product by silica gel column chromatography (hexane/EtOAc = 5/1) gave **3q** (21.9 mg, 145  $\mu\text{mol}$ , 73%) as a pale yellow oil. The spectral data of **3q** was in good agreement with the literature data.<sup>19</sup>

#### Synthesis of **3r** from bromotosylate **1r**

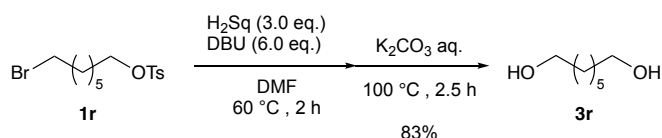

According to the general procedure, a mixture of **1r** (74.0 mg, 212  $\mu\text{mol}$ ) and  $\text{H}_2\text{Sq}$  (72.6 mg, 637  $\mu\text{mol}$ ) in DMF (420  $\mu\text{L}$ ) was reacted with DBU (190  $\mu\text{L}$ , 1.27 mmol) at 60 °C for 2 h, and the reaction mixture was treated with 10% (w/w)  $\text{K}_2\text{CO}_3$  aq. (1 mL) at 100 °C for 2.5 h. Due to the high polarity of **3r**, the aqueous mixture was extracted with EtOAc (1 mL  $\times$  4) and THF (1 mL  $\times$  3). Purification of an obtained crude product including **3r** by silica gel column chromatography (hexane/EtOAc = 1/2) gave **3r** (23.2 mg, 175  $\mu\text{mol}$ , 83%) as a colorless oil. The spectral data of **3r** was in good agreement with the literature data.<sup>20</sup>

18. K. Matsuoka, N. Komami, M. Kojima, T. Mita, K. Suzuki, S. Maeda, T. Yoshino, and S. Matsunaga, *J. Am. Chem. Soc.* 2021, **143**, 103.

19. R. I. Khusnutdinov, N. A. Shchadneva, R. Yu. Burangulova, Z. S. Muslimov, and U. M. Dzhemilev, *Russ. J. Org. Chem.*, 2006, **42**, 1615.

20. L. Wu, I. Fleischer, R. Jackstell, I. Profir, R. Franke, and M. Beller, *J. Am. Chem. Soc.*, 2013, **135**, 14306.

#### Synthesis of **3r** from bromochloride **1q**

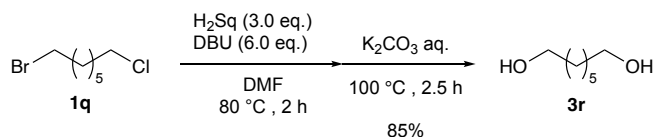

According to the general procedure, a mixture of **1q** (44.1 mg, 200  $\mu\text{mol}$ ) and  $\text{H}_2\text{Sq}$  (68.6 mg, 601  $\mu\text{mol}$ ) in DMF (400  $\mu\text{L}$ ) was reacted with DBU (170  $\mu\text{L}$ , 1.27 mmol) at 80 °C for 2 h, and the reaction mixture was treated with 10% (w/w)  $\text{K}_2\text{CO}_3$  aq. (1 mL) at 100 °C for 2.5 h. Due to the high polarity of **3r**, the aqueous mixture was extracted with THF (1 mL  $\times$  5). Purification of an obtained crude product including **3r** by silica gel column chromatography (hexane/EtOAc = 1/2) gave **3r** (22.5 mg, 170  $\mu\text{mol}$ , 85%) as a colorless oil. The spectral data of **3r** was in good agreement with the literature data.<sup>20</sup>

#### Synthesis of **3s** from dibromide **1s**

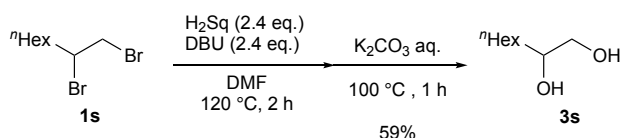

Note: When this reaction was conducted according to the general procedure, an E2 reaction triggered by DBU occurred preferentially; thus, the following protocol was performed.

To a solution of  $\text{H}_2\text{Sq}$  (57.5 mg, 504  $\mu\text{mol}$ ) in DMF (210  $\mu\text{L}$ ) was added DBU (75.5  $\mu\text{L}$ , 505  $\mu\text{mol}$ ) and the mixture was stirred for 5 min at 120 °C. Then, a solution of **1s** (57.2 mg, 210  $\mu\text{mol}$ ) in DMF (210  $\mu\text{L}$ ) was added to the reaction mixture. After stirring for 2 h at 120 °C, to the reaction mixture was added 10%(w/w)  $\text{K}_2\text{CO}_3$  aq (1 mL). After stirring for 1 h at 100 °C, the reaction was quenched with brine (1 mL), and the mixture was extracted with EtOAc (1 mL  $\times$  3). The organic layer was dried over  $\text{MgSO}_4$  and filtered. The filtrate was concentrated under reduced pressure to give a crude product including **3s**, which was purified by silica gel column chromatography (hexane/EtOAc = 1/1) to give **3s** (18.0 mg, 123  $\mu\text{mol}$ , 59%) as a pale yellow oil. The spectral data of **3s** was in good agreement with the literature data.<sup>21</sup>

---

21. Q. Yao, *Org. Lett.* 2002, **4**, 2197.

### Synthesis of alcohol 7 from alkene 5

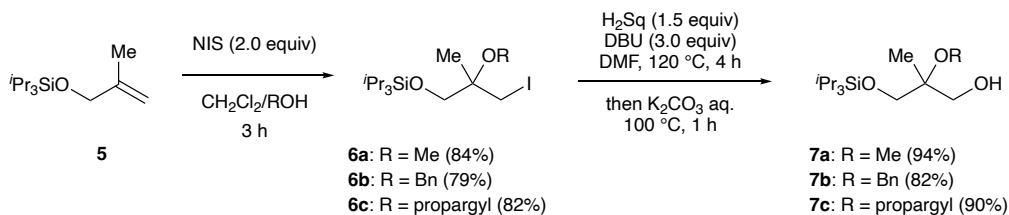

### General procedure of synthesis of ether 6 and 7

To a solution of **5** in a mixture of  $\text{CH}_2\text{Cl}_2$  and ROH (ca. 1:1, 0.24 M) was added NIS (2.0 eq.) at rt. After stirring for 3 h, the reaction was quenched with 10%  $\text{Na}_2\text{S}_2\text{O}_3$  aq. (1 mL). The mixture was extracted with diethyl ether for three times, and the combined organic layers were dried over  $\text{MgSO}_4$  and filtered. The filtrate was concentrated under reduced pressure to give a crude product, which was purified by silica gel column chromatography to give **6**.

To a solution of **6** (1.0 eq.) and  $\text{H}_2\text{Sq}$  (1.5 eq.) in DMF (0.5 M) was added DBU (3.0 eq.) at rt, and the reaction mixture was stirred at 120  $^\circ\text{C}$ . After stirring for 4 h, the reaction mixture was added 10%  $\text{K}_2\text{CO}_3$  aq. (1 mL) at 100  $^\circ\text{C}$ , and the mixture was further stirred for 1 h at the same temperature. The reaction was quenched with brine (1 mL), and the aqueous mixture was extracted with EtOAc (1 mL  $\times$  3). The combined organic layers were dried over  $\text{MgSO}_4$  and filtered. The filtrate was concentrated under reduced pressure to give a crude product, which was purified by silica gel column chromatography to give **7**.

### Synthesis of ether 6a

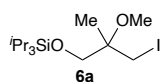

According to the general procedure, the reaction of **5** (61.0 mg, 267  $\mu\text{mol}$ ) in MeOH (530  $\mu\text{L}$ , 13.1 mmol) and  $\text{CH}_2\text{Cl}_2$  (530  $\mu\text{L}$ ) with NIS (122 mg, 542  $\mu\text{mol}$ ) at rt for 3 h afforded a crude product including **6a**. Purification of the crude product by silica gel column chromatography (hexane/EtOAc = 20/1) gave **6a** (86.1 mg, 223  $\mu\text{mol}$ , 84%) as a colorless oil.

Data for **6a**: IR (ATR): 2941, 2892, 2865, 1462, 1201, 1119, 882, 809, 682  $\text{cm}^{-1}$ .  $^1\text{H}$  NMR ( $\text{CDCl}_3$ , 500 MHz):  $\delta$  = 3.76 (d,  $J$  = 9.7 Hz, 1H), 3.54 (d,  $J$  = 9.7 Hz, 1H), 3.51 (d,  $J$  = 10.3 Hz, 1H), 3.33 (d,  $J$  = 10.3 Hz, 1H), 3.27 (s, 3H), 1.36 (s, 3H), 1.19–1.06 (m, 21H).  $^{13}\text{C}$  NMR ( $\text{CDCl}_3$ , 126 MHz):  $\delta$  = 75.6, 67.7, 50.0, 19.2, 18.2 (6C), 13.3, 12.0 (3C). HRMS (FI):  $m/z$  [ $\text{M} + \text{H}$ ] $^+$  calcd for  $\text{C}_{14}\text{H}_{32}\text{IO}_2\text{Si}$ : 387.1216; found: 387.1203.

### Synthesis of ether 6b

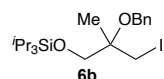

According to the general procedure, the reaction of **5** (47.8 mg, 209  $\mu\text{mol}$ ) in BnOH (420  $\mu\text{L}$ , 4.04 mmol) and  $\text{CH}_2\text{Cl}_2$  (530  $\mu\text{L}$ ) with NIS (94.3 mg, 419  $\mu\text{mol}$ ) at rt for 3 h afforded a crude product including **6b**. Purification of the crude product by silica gel column chromatography (hexane/EtOAc = 100/1) gave **6b** (76.0 mg, 164  $\mu\text{mol}$ , 79%) as a colorless oil.

Data for **6b**: IR (ATR): 2942, 2890, 2865, 1462, 1383, 1183, 1115, 1070, 882, 814, 736, 683  $\text{cm}^{-1}$ .  $^1\text{H}$  NMR ( $\text{CDCl}_3$ , 500 MHz):  $\delta$  = 7.41–7.26 (m, 5H), 4.54 (d,  $J$  = 10.9 Hz, 1H), 4.48 (d,  $J$  = 10.9 Hz, 1H), 3.85 (d,  $J$  = 9.8 Hz, 1H), 3.63 (d,  $J$  = 9.8 Hz, 1H), 3.62 (d,  $J$  = 10.9 Hz, 1H), 3.45 (d,  $J$  = 10.9 Hz, 1H), 1.47 (s, 3H),



1.25–1.07 (m, 21H).  $^{13}\text{C}$  NMR ( $\text{CDCl}_3$ , 126 MHz):  $\delta$  = 138.7, 128.4 (2C), 127.9 (2C), 127.6, 76.0, 68.2, 64.5, 20.2, 18.2 (6C), 13.7, 12.0 (3C). HRMS (FI):  $m/z$   $[\text{M} + \text{H}]^+$  calcd for  $\text{C}_{20}\text{H}_{36}\text{IO}_2\text{Si}$ : 463.1529; found: 463.1548.

#### Synthesis of ether **6c**

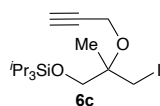

According to the general procedure, the reaction of **5** (113 mg, 494  $\mu\text{mol}$ ) in propargyl alcohol (990  $\mu\text{L}$ , 17.1 mmol) and  $\text{CH}_2\text{Cl}_2$  (990  $\mu\text{L}$ ) with NIS (222 mg, 987  $\mu\text{mol}$ ) at rt for 3 h afforded a crude product including **6c**. Purification of the crude product by silica gel

column chromatography (hexane/EtOAc = 30/1) gave **6c** (166.9 mg, 407  $\mu\text{mol}$ , 82%) as a colorless oil.

Data for **6c**: IR (ATR): 3310, 2942, 2892, 2866, 2364, 1462, 1382, 1180, 1114, 1070, 996, 882, 798, 683  $\text{cm}^{-1}$ .  $^1\text{H}$  NMR ( $\text{CDCl}_3$ , 500 MHz):  $\delta$  = 4.24 (d,  $J$  = 14.9 Hz, 1H), 4.19 (d,  $J$  = 14.9 Hz, 1H), 3.81 (d,  $J$  = 9.7 Hz, 1H), 3.64 (d,  $J$  = 9.7 Hz, 1H), 3.50 (d,  $J$  = 10.9 Hz, 1H), 3.35 (d,  $J$  = 10.9 Hz, 1H), 2.41 (s, 1H), 1.43 (s, 3H), 1.29–0.94 (m, 21H).  $^{13}\text{C}$  NMR ( $\text{CDCl}_3$ , 126 MHz):  $\delta$  = 80.8, 77.0, 73.8, 68.0, 51.3, 20.2, 18.1 (6C), 12.8, 11.2 (3C). HRMS (FD):  $m/z$   $[\text{M}]^+$  calcd for  $\text{C}_{16}\text{H}_{31}\text{IO}_2\text{Si}$ : 411.1216; found: 411.1216.

#### Synthesis of alcohol **7a**

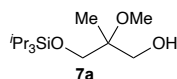

According to the general procedure, **6a** (77.6 mg, 201  $\mu\text{mol}$ ) and  $\text{H}_2\text{Sq}$  (34.3 mg, 301  $\mu\text{mol}$ ) in DMF (400  $\mu\text{L}$ ) with DBU (90.2  $\mu\text{L}$ , 603  $\mu\text{mol}$ ) at 120  $^\circ\text{C}$  for 4 h, followed by

the treatment of the mixture with 10%  $\text{K}_2\text{CO}_3$  aq. (1 mL) at 100  $^\circ\text{C}$  for 1 h afforded a crude product including **7a**. Purification of the crude product by silica gel column chromatography (hexane/EtOAc = 5/1) gave **7a** (51.9 mg, 188  $\mu\text{mol}$ , 94%) as a colorless oil.

Data for **7a**: IR (ATR): 3459, 2942, 2866, 1464, 1109, 1069, 882, 805, 681  $\text{cm}^{-1}$ .  $^1\text{H}$  NMR ( $\text{CDCl}_3$ , 500 MHz):  $\delta$  = 3.77 (d,  $J$  = 9.7 Hz, 1H), 3.65–3.55 (m, 3H), 3.30 (s, 3H), 2.27 (t,  $J$  = 6.0 Hz, 1H), 1.15 (s, 3H), 1.14–0.86 (m, 21H).  $^{13}\text{C}$  NMR ( $\text{CDCl}_3$ , 126 MHz):  $\delta$  = 77.2, 67.1, 65.6, 50.1, 18.1 (6C), 16.9, 12.0 (3C). HRMS (FD):  $m/z$   $[\text{M} + \text{H}]^+$  calcd for  $\text{C}_{14}\text{H}_{33}\text{O}_3\text{Si}$ : 277.2199; found: 277.2212.

#### Synthesis of alcohol **7b**

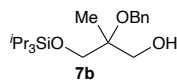

According to the general procedure, **6b** (103 mg, 223  $\mu\text{mol}$ ) and  $\text{H}_2\text{Sq}$  (38.3 mg, 336  $\mu\text{mol}$ ) in DMF (450  $\mu\text{L}$ ) with DBU (100  $\mu\text{L}$ , 669  $\mu\text{mol}$ ) at 120  $^\circ\text{C}$  for 4 h, followed by

the treatment of the mixture with 10%  $\text{K}_2\text{CO}_3$  aq. (1 mL) at 100  $^\circ\text{C}$  for 1 h afforded a crude product including **7b**. Purification of the crude product by silica gel column chromatography (hexane/EtOAc = 5/1) gave **7b** (64.7 mg, 184  $\mu\text{mol}$ , 82%) as a colorless oil.

Data for **7b**: IR (ATR): 3473, 2942, 2866, 1463, 1385, 1109, 1065, 882, 804, 736, 682  $\text{cm}^{-1}$ .  $^1\text{H}$  NMR ( $\text{CDCl}_3$ , 500 MHz):  $\delta$  = 7.34–7.23 (m, 5H), 4.57 (s, 2H), 3.85 (d,  $J$  = 9.7 Hz, 1H), 3.70 (d,  $J$  = 9.7 Hz, 1H), 3.70 (d,  $J$  = 11.5 Hz, 1H), 3.65 (d,  $J$  = 11.5 Hz, 1H), 1.27 (s, 3H), 1.17–0.99 (m, 21H).  $^{13}\text{C}$  NMR ( $\text{CDCl}_3$ , 126 MHz):  $\delta$  = 139.2, 128.5 (2C), 127.6 (2C), 127.5, 77.9, 67.6, 66.3, 64.7, 18.1 (6C), 17.7, 12.0 (3C). HRMS (FD):  $m/z$   $[\text{M} + \text{H}]^+$  calcd for  $\text{C}_{20}\text{H}_{37}\text{O}_3\text{Si}$ : 353.2512; found: 353.2527.

### Synthesis of alcohol **7c**

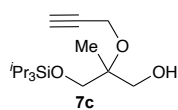

According to the general procedure, **6c** (81.8 mg, 200  $\mu\text{mol}$ ) and  $\text{H}_2\text{Sq}$  (34.2 mg, 300  $\mu\text{mol}$ ) in DMF (400  $\mu\text{L}$ ) with DBU (89.6  $\mu\text{L}$ , 599  $\mu\text{mol}$ ) at 120  $^\circ\text{C}$  for 4 h, followed by the treatment of the mixture with 10%  $\text{K}_2\text{CO}_3$  aq. (1 mL) at 100  $^\circ\text{C}$  for 1 h afforded a crude product including **7c**. Purification of the crude product by silica gel column chromatography (hexane/EtOAc = 5/1) gave **7c** (53.8 mg, 180  $\mu\text{mol}$ , 90%) as a colorless oil.

Data for **7c**: IR (ATR): 3447, 3311, 2941, 2866, 2359, 1463, 1385, 1108, 1063, 881, 804, 681  $\text{cm}^{-1}$ .  $^1\text{H}$  NMR ( $\text{CDCl}_3$ , 500 MHz):  $\delta$  = 4.28 (d,  $J$  = 15.8 Hz, 1H), 4.24 (d,  $J$  = 15.8 Hz, 1H), 3.80 (d,  $J$  = 10.3 Hz, 1H), 3.67–3.58 (m, 3H), 2.42 (t,  $J$  = 2.3 Hz, 1H), 2.25 (t,  $J$  = 6.3 Hz, 1H), 1.23 (s, 3H), 1.14–0.86 (m, 21H).  $^{13}\text{C}$  NMR ( $\text{CDCl}_3$ , 126 MHz):  $\delta$  = 81.4, 79.0, 73.7, 67.5, 65.9, 51.3, 18.1 (6C), 17.4, 11.9 (3C). HRMS (FI):  $m/z$   $[\text{M}]^+$  calcd for  $\text{C}_{16}\text{H}_{32}\text{O}_3\text{Si}$ : 300.2121; found: 300.2112.

### Synthesis of a 1.8:1 mixture of bromide **9** and **10**

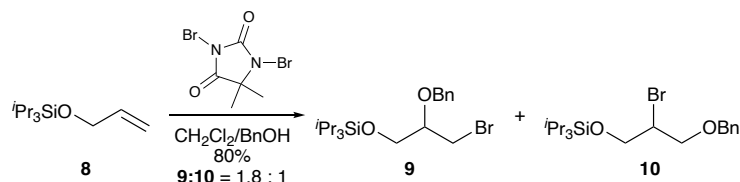

To a solution of **8** (187 mg, 871  $\mu\text{mol}$ ) in  $(\text{CH}_2\text{Cl}_2)_2$  (870  $\mu\text{L}$ ) and BnOH (870  $\mu\text{L}$ ) was added 1,3-dibromo-5,5-dimethylhydantoin (150 mg, 523  $\mu\text{mol}$ ). After stirring for 4 h at rt, the reaction was quenched with saturated  $\text{NH}_4\text{Cl}$  aq. (2 mL), and the mixture was extracted with diethyl ether (1 mL  $\times$  3). The organic layer was dried ( $\text{MgSO}_4$ ) and filtered. The filtrate was concentrated under reduced pressure to give crude product. To remove excess BnOH, the crude product was roughly purified by silica gel column chromatography (hexane/EtOAc = 20/1) to give an impure product including **9** and **10**. The mixture was further purified by silica gel column chromatography (hexane/EtOAc = 100/1) to give an inseparable mixture of **9** and **10** (139 mg) as a pale yellow oil and a mixture of two desired products and benzaldehyde dibenzylacetal (157 mg). The impure product was purified by PTLC (0.05 mm, hexane/EtOAc = 10/1) to give an inseparable mixture of **9** and **10** (140 mg). The total amount of the obtained mixture of **9** and **10** were 279 mg (696  $\mu\text{mol}$ , 80%, **9:10** = 1.8:1).

NMR data of a 1.8:1 mixture of **9** and **10**:  $^1\text{H}$  NMR ( $\text{CDCl}_3$ , 500 MHz):  $\delta$  = 7.39–7.26 (m, 5H), 4.71 (d,  $J$  = 11.5 Hz, 0.64H), 4.64 (d,  $J$  = 11.5 Hz, 1H, 0.64H), 4.59 (s, 0.72H), 4.12 (dddd,  $J$  = 6.5, 5.8, 5.3, 4.5 Hz, 0.36H), 4.03–3.94 (m, 0.72H), 3.88 (dd,  $J$  = 10.3, 5.3 Hz, 0.36H), 3.84–3.74 (m, 1.28 + 0.36H), 3.70–3.61 (m, 1.28H), 3.54 (dd,  $J$  = 10.4, 4.8 Hz, 0.64H), 1.15–0.96 (m, 21H).  $^{13}\text{C}$  NMR ( $\text{CDCl}_3$ , 126 MHz): 138.2, 138.0, 128.5 (4C), 128.0 (2C), 127.9, 127.8 (3C), 78.9, 73.4, 72.4 70.9, 64.6, 63.7, 52.4, 33.1, 18.1 (12C), 12.1 (3C), 12.0 (3C).

## Synthesis of alcohol **11** and **12**

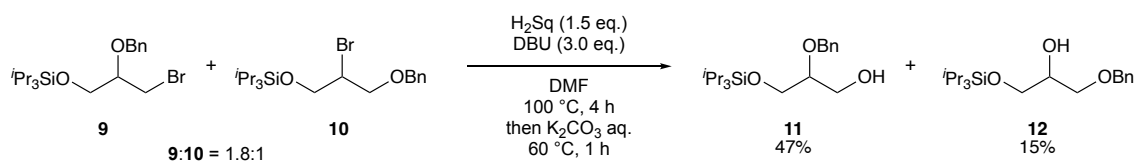

To a solution of  $\text{H}_2\text{Sq}$  (32.5 mg, 285  $\mu\text{mol}$ ) in DMF (180  $\mu\text{L}$ ) was added DBU (85.1  $\mu\text{L}$ , 569  $\mu\text{mol}$ ), and the mixture was stirred at 100 °C for 5 minutes. Then, a 1.8:1 mixture of **9** and **10** (76.2 mg, 190  $\mu\text{mol}$ ) in DMF (180  $\mu\text{L}$ ) was added to the reaction mixture. After stirring for 4 h at 100 °C, 10%  $\text{K}_2\text{CO}_3$  aq. (1 mL) was added to the reaction mixture, and the mixture was further stirred for 1 h at 60 °C. The reaction was quenched with brine (1 mL), and the mixture was filtered through a Celite pad to remove insoluble solids. The filtrate was extracted with  $\text{Et}_2\text{O}$  (1 mL  $\times$  3). The organic layer was dried ( $\text{MgSO}_4$ ) and filtered. The filtrate was concentrated under reduced pressure to give a crude product, which was purified by silica gel column chromatography (hexane/ $\text{EtOAc}$  = 15/1) to give **11** (30.0 mg, 88.7  $\mu\text{mol}$ , 47%) as a pale yellow oil and **12** (9.6 mg, 28.4  $\mu\text{mol}$ , 15%) as a pale yellow oil.

Data for **11**: IR (ATR): 3442, 2942, 2866, 1463, 1105, 1068, 882, 683  $\text{cm}^{-1}$ .  $^1\text{H}$  NMR ( $\text{CDCl}_3$ , 500 MHz):  $\delta$  = 7.39–7.26 (m, 5H), 4.71 (d,  $J$  = 11.5 Hz, 1H), 4.63 (d,  $J$  = 11.5 Hz, 1H), 3.86 (dd,  $J$  = 10.5, 5.0 Hz, 1H), 3.82–3.74 (m, 2H), 3.69 (dd,  $J$  = 11.5, 5.0 Hz, 1H), 3.61 (dd,  $J$  = 10.5, 5.0 Hz, 1H), 1.15–0.98 (m, 21H).  $^{13}\text{C}$  NMR ( $\text{CDCl}_3$ , 126 MHz): 138.5, 128.6 (2C), 127.9 (3C), 79.6, 72.4, 63.9, 63.2, 18.1 (6C), 12.0 (3C). HRMS (FI):  $m/z$  [ $\text{M} + \text{H}$ ] $^+$  calcd for  $\text{C}_{19}\text{H}_{35}\text{O}_3\text{Si}$ : 339.2356; found: 339.2351.

Data for **12**: IR (ATR): 2943, 2866, 1456, 1104  $\text{cm}^{-1}$ .  $^1\text{H}$  NMR ( $\text{CDCl}_3$ , 500 MHz):  $\delta$  = 7.37–7.26 (m, 5H), 4.56 (s, 2H), 3.90–3.84 (m, 1H), 3.79–3.69 (m, 2H), 3.57 (dd,  $J$  = 9.5, 5.0 Hz, 1H), 3.53 (d,  $J$  = 9.5, 6.0 Hz, 1H), 1.15–0.98 (m, 21H).  $^{13}\text{C}$  NMR ( $\text{CDCl}_3$ , 126 MHz): 138.2, 128.5 (2C), 127.9 (2C), 127.8, 73.6, 71.1, 71.0, 64.4, 18.1 (6C), 12.0 (3C). HRMS (FI):  $m/z$  [ $\text{M} + \text{H}$ ] $^+$  calcd for  $\text{C}_{19}\text{H}_{35}\text{O}_3\text{Si}$ : 339.2356; found: 339.2355.

### Synthesis of alcohol **11** and recovery of bromide **10**

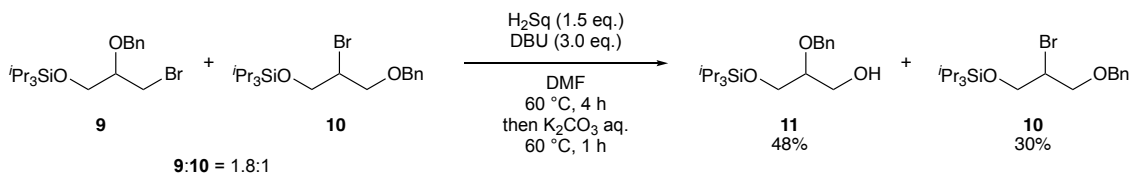

To a solution of H<sub>2</sub>Sq (20.4 mg, 179  $\mu$ mol) in DMF (120  $\mu$ L) was added DBU (53.5  $\mu$ L, 358  $\mu$ mol), and the mixture was stirred at 100  $^{\circ}$ C for 5 minutes. Then, a solution of a 1.8:1 mixture of **9** and **10** (111 mg, 0.276 mmol) in DMF (120  $\mu$ L) was added to the reaction mixture. After stirring for 2 h at 60  $^{\circ}$ C, 10% K<sub>2</sub>CO<sub>3</sub> aq. (1 mL) was added to the reaction mixture, and the mixture was further stirred for 1 h at 60  $^{\circ}$ C. The reaction was quenched with brine (1 mL), and the mixture was filtered through a Celite pad to remove insoluble solids. The filtrate was extracted with Et<sub>2</sub>O (1 mL  $\times$  3). The organic layer was dried (MgSO<sub>4</sub>) and filtered. The filtrate was concentrated under reduced pressure to give a crude product, which was purified by silica gel column chromatography (hexane/EtOAc = 30/1 to 10/1) to give **11** (19.2 mg, 56.7  $\mu$ mol, 48%) as a pale yellow oil and **10** (14.4 mg, 35.9  $\mu$ mol, 30%) as a pale yellow oil.

Data for **10**: IR (ATR): 3446, 2942, 2866, 1457, 1100, 882, 773, 682 cm<sup>-1</sup>. <sup>1</sup>H NMR (CDCl<sub>3</sub>, 500 MHz):  $\delta$  = 7.39–7.26 (m, 5H), 4.59 (s, 2H), 4.12 (dddd,  $J$  = 6.5, 5.8, 5.3, 4.5 Hz, 1H), 4.03–3.94 (m, 2H), 3.88 (dd,  $J$  = 10.3, 5.3 Hz, 1H), 3.77 (dd,  $J$  = 10.3, 5.8 Hz, 1H), 1.15–0.96 (m, 21H). <sup>13</sup>C NMR (CDCl<sub>3</sub>, 126 MHz): 138.0, 128.5 (2C), 127.8 (3C), 73.4, 70.9, 64.6, 52.4, 18.1 (6C), 12.1 (3C). HRMS (FD):  $m/z$  [M + H]<sup>+</sup> calcd for C<sub>19</sub>H<sub>34</sub>BrO<sub>2</sub>Si: 401.1511; found: 401.1499.

### Synthesis of dibromide **14**

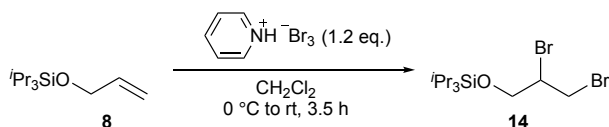

To a solution of **8** (627 mg, 2.92 mmol) in CH<sub>2</sub>Cl<sub>2</sub> (8.9 mL) was added pyridinium tribromide (1.12 g, 3.51 mmol) at 0  $^{\circ}$ C, and the reaction mixture was stirred for 2.5 h at rt. After stirring for 1 h at 0  $^{\circ}$ C, the reaction was quenched with 10 % NaHSO<sub>3</sub> aq. (5 mL). The mixture was diluted with hexane (10 mL), and the organic layer was washed with water (10 mL  $\times$  3). The organic layer was dried over MgSO<sub>4</sub>, and filtered. The filtrate was concentrated under reduced pressure to give **14** (1.07 g, 2.85 mmol, 98%) as a colorless oil. Data for **14**: IR (ATR): 2943, 2866, 1459, 1142, 1068, 995, 930, 882, 774, 684 cm<sup>-1</sup>. <sup>1</sup>H NMR (CDCl<sub>3</sub>, 500 MHz):  $\delta$  = 4.24–4.12 (m, 2H), 4.01 (dd,  $J$  = 10.5, 4.8 Hz, 1H), 3.90 (dd,  $J$  = 10.0, 8.3 Hz, 1H), 3.79 (dd,  $J$  = 10.5, 4.5 Hz, 1H), 1.19–0.98 (m, 21H). <sup>13</sup>C NMR (CDCl<sub>3</sub>, 126 MHz): 64.7, 52.1, 33.0, 18.1 (6C), 12.1 (3C). HRMS (FD):  $m/z$  [M + H]<sup>+</sup> calcd for C<sub>12</sub>H<sub>27</sub>Br<sub>2</sub>OSi: 373.0198; found: 373.0207.

### Synthesis of bromohydrin **16**

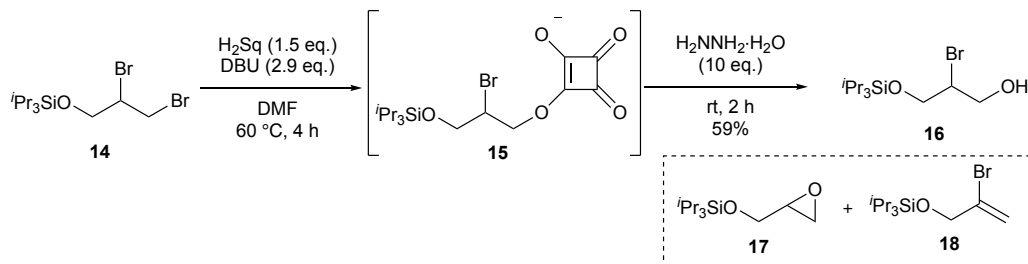

To a solution of H<sub>2</sub>Sq (30.8 mg, 277  $\mu$ mol) in DMF (180  $\mu$ L) was added DBU (79.3  $\mu$ L, 531  $\mu$ mol). After stirring for 5 min at 60  $^{\circ}$ C, a solution of **14** (69.0 mg, 184  $\mu$ mol) in DMF (180  $\mu$ L) was added to the reaction mixture. After stirring for 4 h at 60  $^{\circ}$ C, H<sub>2</sub>NNH<sub>2</sub>·H<sub>2</sub>O (89.4  $\mu$ L, 1.84 mmol) was added to the reaction mixture at 0  $^{\circ}$ C. After stirring for 2 h at rt, the reaction was quenched with brine (1 mL). After the mixture was filtered through a Celite pad, the filtrate was extracted with EtOAc (1 mL  $\times$  3). The combined organic layers were dried over MgSO<sub>4</sub> and filtered. The filtrate was concentrated under reduced pressure to give a crude product, which was purified by silica gel column chromatography (hexane/ethyl acetate = 30/1 to 10/1) to give **16** (33.8 mg, 109  $\mu$ mol, 59%) as a colorless oil. Byproducts **17** (2.0 mg, 8.68  $\mu$ mol, 5%) and **18** (10.3 mg, 35.1  $\mu$ mol, 19%) was also isolated through this purification.

Data for **16**: IR (ATR): 3404, 2943, 2866, 1463, 1102, 881, 791, 684 cm<sup>-1</sup>. <sup>1</sup>H NMR (CDCl<sub>3</sub>, 500 MHz):  $\delta$  = 4.17–4.11 (m, 1H), 4.05 (dd,  $J$  = 10.5, 4.5 Hz, 1H), 4.02–3.90 (m, 3H), 2.36 (t,  $J$  = 6.6 Hz, 1H), 1.17–0.96 (m, 21H). <sup>13</sup>C NMR (CDCl<sub>3</sub>, 126 MHz): 66.0, 65.4, 54.7, 18.0 (6C), 12.0 (3C). HRMS (FI):  $m/z$  [ $M$  + H]<sup>+</sup> calcd for C<sub>12</sub>H<sub>28</sub>BrO<sub>2</sub>Si: 311.1042; found: 311.1041.

### Synthesis of azidoalcohol **13**

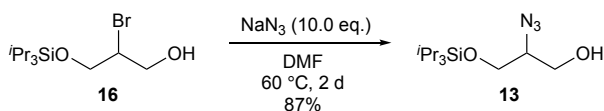

To a solution of **16** (29.8 mg, 95.7  $\mu$ mol) in DMF (480  $\mu$ L) was added NaN<sub>3</sub> (62.2 mg, 957  $\mu$ mol). After stirring for 2 d at 60  $^{\circ}$ C, the reaction was quenched with brine (1 mL), and the mixture was extracted with EtOAc (1 mL  $\times$  3). The combined organic layers were dried over MgSO<sub>4</sub> and filtered. The filtrate was concentrated under reduced pressure to give a crude product, which was purified by silica gel column chromatography (hexane/ethyl acetate = 10/1) to give **13** (22.7 mg, 83.0  $\mu$ mol, 87%) as a colorless oil.

Data for **13**: IR (ATR): 3392, 2943, 2892, 2867, 2095, 1463, 1270, 1123, 1028, 882, 774, 684 cm<sup>-1</sup>. <sup>1</sup>H NMR (CDCl<sub>3</sub>, 500 MHz):  $\delta$  = 3.89 (d,  $J$  = 5.7 Hz, 2H), 3.78 (ddd,  $J$  = 11.2, 6.0, 4.7 Hz, 1H), 3.69 (dt,  $J$  = 11.2, 6.0 Hz, 1H), 3.58 (ddd,  $J$  = 6.0, 5.7, 4.7 Hz, 1H), 1.96 (t,  $J$  = 6.0 Hz, 1H), 1.19–0.99 (m, 21H). <sup>13</sup>C NMR (CDCl<sub>3</sub>, 126 MHz): 64.5, 64.4, 62.9, 18.0 (6C), 12.0 (3C). HRMS (FI):  $m/z$  [ $M$  + H]<sup>+</sup> calcd for C<sub>12</sub>H<sub>28</sub>N<sub>3</sub>O<sub>2</sub>Si: 274.1951; found: 274.1942.

### Synthesis of tosylate (**18**) and androsterone (**19**)

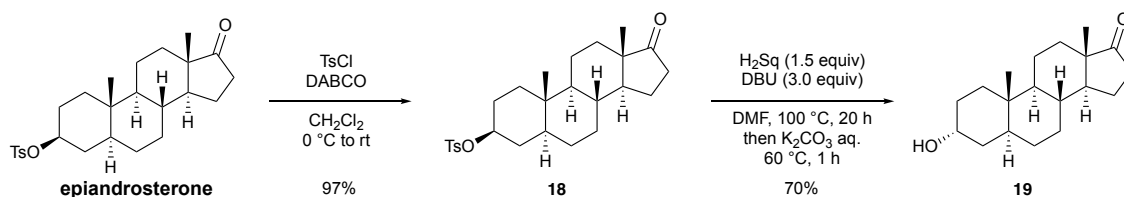

#### Synthesis of tosylate (**18**)

To a solution of epiandrosterone (600 mg, 2.07 mmol) and DABCO (600 mg, 5.35 mmol) in CH<sub>2</sub>Cl<sub>2</sub> (6 mL) was added TsCl (600 mg, 3.15 mmol) at 0 °C. After stirring for 1 h at rt, the reaction was quenched with sat. NaHCO<sub>3</sub> aq. (6 mL), and the aqueous mixture was extracted with CH<sub>2</sub>Cl<sub>2</sub> for three times. The combined organic layers were dried over MgSO<sub>4</sub> and filtered. The filtrate was concentrated under reduced pressure to give a crude product, which was purified by silica gel column chromatography (hexane/EtOAc = 5/1) to give tosylate **18** (581 mg, 2.00 mmol, 97%) as a white solid.

Data for **18**: mp 166–167 °C (recrystallized from Et<sub>2</sub>O, colorless needle). IR (ATR): 2937, 2860, 1738, 1360, 1175, 930 cm<sup>-1</sup>. <sup>1</sup>H NMR (CDCl<sub>3</sub>, 500 MHz):  $\delta$  = 7.79 (d,  $J$  = 8.0 Hz, 2H), 7.33 (d,  $J$  = 8.0 Hz, 2H), 4.44–4.38 (m, 1H), 2.47–2.40 (m, 4H), 2.09–2.02 (m,  $J$  = 9.5 Hz, 1H), 1.93–1.88 (m, 1H), 1.78–1.75 (m, 3H), 1.69 (dt,  $J$  = 13.4, 3.6 Hz, 1H), 1.65–1.44 (m, 6H), 1.32–1.17 (m, 5H), 1.12–1.07 (m, 1H), 0.97–0.88 (m, 2H), 0.85 (d,  $J$  = 11.5 Hz, 3H), 0.81 (s, 3H), 0.64 (td,  $J$  = 11.3, 3.6 Hz, 1H). <sup>13</sup>C NMR (CDCl<sub>3</sub>, 126 MHz):  $\delta$  = 221.2, 144.4, 134.6, 129.7 (2C), 127.6 (2C), 82.1, 54.1, 51.2, 47.7, 44.7, 36.7, 35.8, 35.3, 34.9, 34.8, 31.4, 30.7, 28.2, 28.0, 21.7, 21.6, 20.4, 13.8, 12.1. HRMS (FD):  $m/z$  [M]<sup>+</sup> calcd for C<sub>26</sub>H<sub>36</sub>O<sub>4</sub>S: 444.2334; found: 444.2319.

#### Synthesis of androsterone (**19**)

According to the general procedure for the synthesis of **7** from **6**, the reaction of **18** (89.4 mg, 202  $\mu$ mol) with a mixture of H<sub>2</sub>Sq (34.2 mg, 300  $\mu$ mol) and DBU (89.6  $\mu$ L, 600  $\mu$ mol) in DMF (1 mL) at 100 °C for 20 h, followed by the treatment of the mixture with 10% K<sub>2</sub>CO<sub>3</sub> aq. (2 mL) at 60 °C for 1 h afforded a crude product including **19**. Purification of the crude product by silica gel column chromatography (hexane/EtOAc = 5/1) gave **19** (40.6 mg, 140  $\mu$ mol, 70%) as a white solid.

Data for **19**: mp 185–188 °C (recrystallized from hexane, colorless needle). IR (ATR): 3433, 2854, 1735, 1450, 1370, 1059, 1027, 1000, 731 cm<sup>-1</sup>. <sup>1</sup>H NMR (CDCl<sub>3</sub>, 500 MHz):  $\delta$  = 4.04 (t,  $J$  = 2.6 Hz, 1H), 2.45–2.39 (m, 1H), 2.10–2.02 (m, 1H), 1.95–1.90 (m, 1H), 1.78 (qd,  $J$  = 6.4, 3.4 Hz, 2H), 1.71–1.17 (m, 16H), 1.01 (qd,  $J$  = 12.3, 4.9 Hz, 1H), 0.85 (s, 3H), 0.80–0.77 (m, 3H). <sup>13</sup>C NMR (CDCl<sub>3</sub>, 126 MHz):  $\delta$  = 221.5, 66.4, 54.4, 51.5, 47.8, 39.1, 36.2, 35.8, 35.7, 35.0, 32.1, 31.5, 30.8, 29.0, 28.2, 21.7, 20.0, 13.8, 11.2. HRMS (FD):  $m/z$  [M]<sup>+</sup> calcd for C<sub>19</sub>H<sub>30</sub>O<sub>2</sub>: 290.2246; found: 290.2232.

### Synthesis of bromide (**20**) and alcohol (**21**)

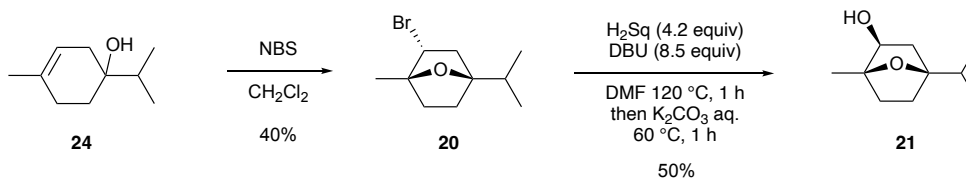

### Synthesis of bromide (**20**)

To a solution of NBS (801 mg, 4.50 mmol) in  $\text{CH}_2\text{Cl}_2$  (10.0 mL) was added **24**<sup>22</sup> (500  $\mu\text{L}$ , 3.05 mmol). After stirring for 1.5 h at rt, the reaction was quenched with sat.  $\text{NaHCO}_3$  aq., and the aqueous mixture was extracted with hexane for three times. The combined organic layers were dried over  $\text{MgSO}_4$  and filtered. The filtrate was concentrated under reduced pressure to give a crude product, which was purified by silica gel column chromatography (hexane/EtOAc= 35/1) to give **20** (281 mg, 1.21 mmol, 40%) as a colorless oil.

Data for **20**: IR (ATR): 2960, 2874, 1467, 1384, 831, 671  $\text{cm}^{-1}$ .  $^1\text{H}$  NMR ( $\text{CDCl}_3$ , 500 MHz):  $\delta$  = 3.86 (qd,  $J$  = 5.3, 2.3 Hz, 1H), 2.56–2.51 (m, 1H), 2.35–2.30 (m, 1H), 2.03–1.98 (m, 1H), 1.73 (dd,  $J$  = 12.9, 4.9 Hz, 1H), 1.67–1.63 (m, 2H), 1.56–1.52 (m, 1H), 1.44 (s, 3H), 0.96 (d,  $J$  = 6.9 Hz), 0.96 (d,  $J$  = 6.9 Hz), 0.94 (d,  $J$  = 6.9 Hz).  $^{13}\text{C}$  NMR ( $\text{CDCl}_3$ , 126 MHz):  $\delta$  = 90.4, 85.9, 53.6, 43.7, 33.1, 32.7, 32.0, 18.8, 17.8, 17.6. HRMS (FD):  $m/z$  [ $\text{M}$ ]<sup>+</sup> calcd for  $\text{C}_{10}\text{H}_{17}\text{BrO}$ : 232.0463; found: 232.0467.

### Synthesis of alcohol (**21**)

According to the general procedure for the synthesis of **3** from **1**, the reaction of **20** (44.1 mg, 189  $\mu\text{mol}$ ) and  $\text{H}_2\text{Sq}$  (91.2 mg, 800  $\mu\text{mol}$ ) in DMF (400  $\mu\text{L}$ ) with DBU (240  $\mu\text{L}$ , 1.71 mmol) at  $120^\circ\text{C}$  for 1 d, followed by the treatment of the mixture with 10% (w/w)  $\text{K}_2\text{CO}_3$  aq. (1 mL) at  $60^\circ\text{C}$  for 1 h afforded a crude product including **21**. Purification of the crude product by silica gel column chromatography (hexane/EtOAc= 4/1) gave **21** (16.1 mg, 94.5  $\mu\text{mol}$ , 50%) as a white solid.

Data for **21**: mp. 61–64  $^\circ\text{C}$  (recrystallized from  $\text{CDCl}_3$ , colorless needle). IR (ATR): 3260, 2964, 1460, 1115, 1053  $\text{cm}^{-1}$ .  $^1\text{H}$  NMR ( $\text{CDCl}_3$ , 500 MHz):  $\delta$  = 3.74 (dd,  $J$  = 7.7, 7.7 Hz, 1H), 2.09–2.04 (m, 2H), 1.69–1.36 (m, 9H), 0.97 (d,  $J$  = 6.9 Hz, 3H), 0.95 (d,  $J$  = 6.9 Hz, 3H).  $^{13}\text{C}$  NMR ( $\text{C}_6\text{D}_6$ , 126 MHz): 88.1, 85.5, 76.8, 45.8, 33.2, 33.0, 32.5, 18.3, 18.2, 16.6. HRMS (FD):  $m/z$  [ $\text{M}$ ]<sup>+</sup> calcd for  $\text{C}_{10}\text{H}_{18}\text{O}_2$ : 170.1307; found: 170.1313.

---

22. R. M. Carman, and B. N. Venzke, *Aust. J. Chem.*, 1973, **26**, 2235.

## **ESI-4 NMR spectra of novel compounds**



$^1\text{H}/^{13}\text{C}$  NMR spectra of methyl alkyl ester **4** (500/126 MHz,  $\text{CDCl}_3$ )

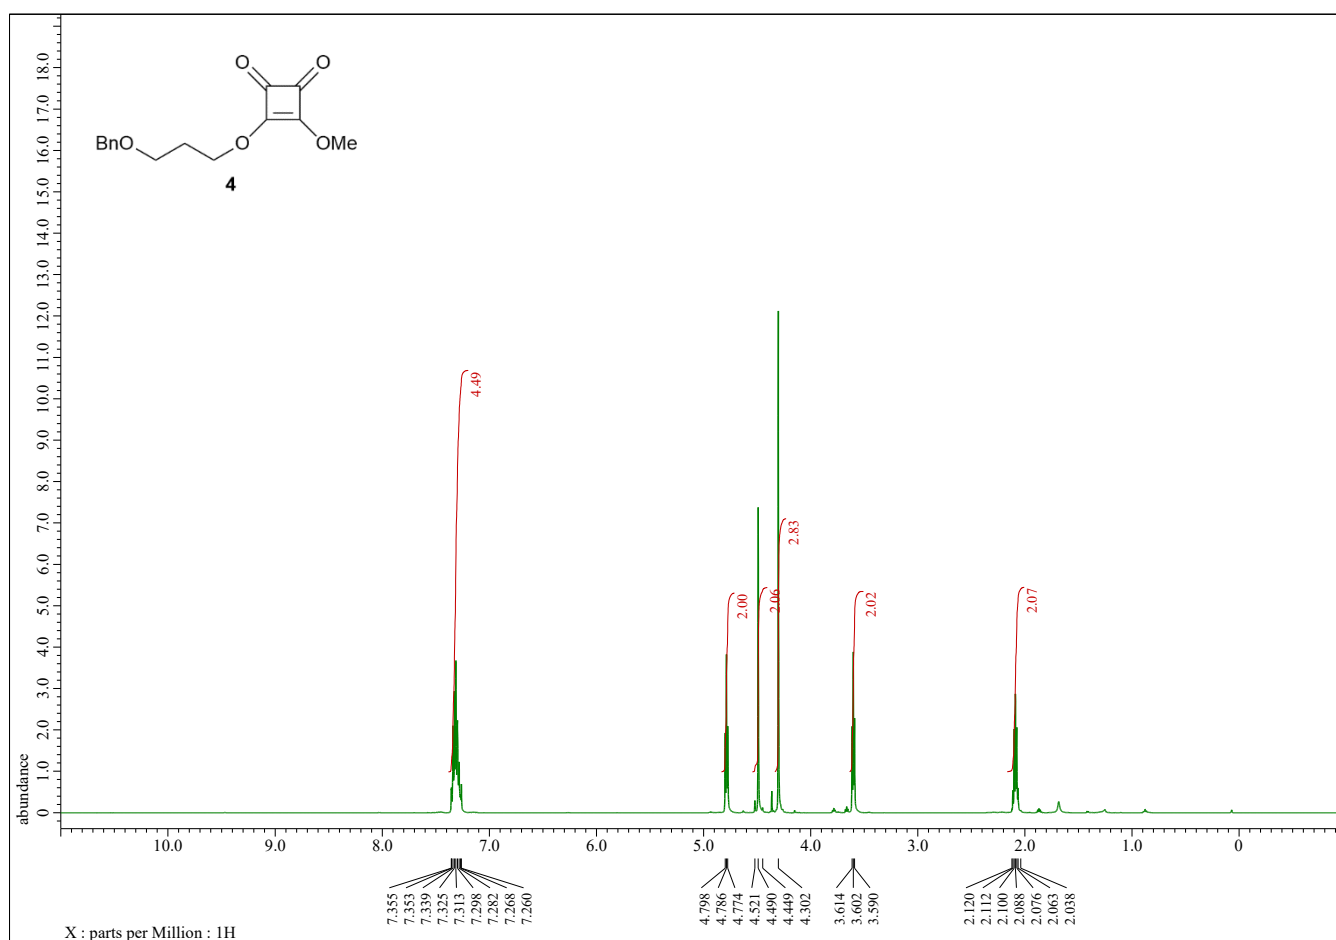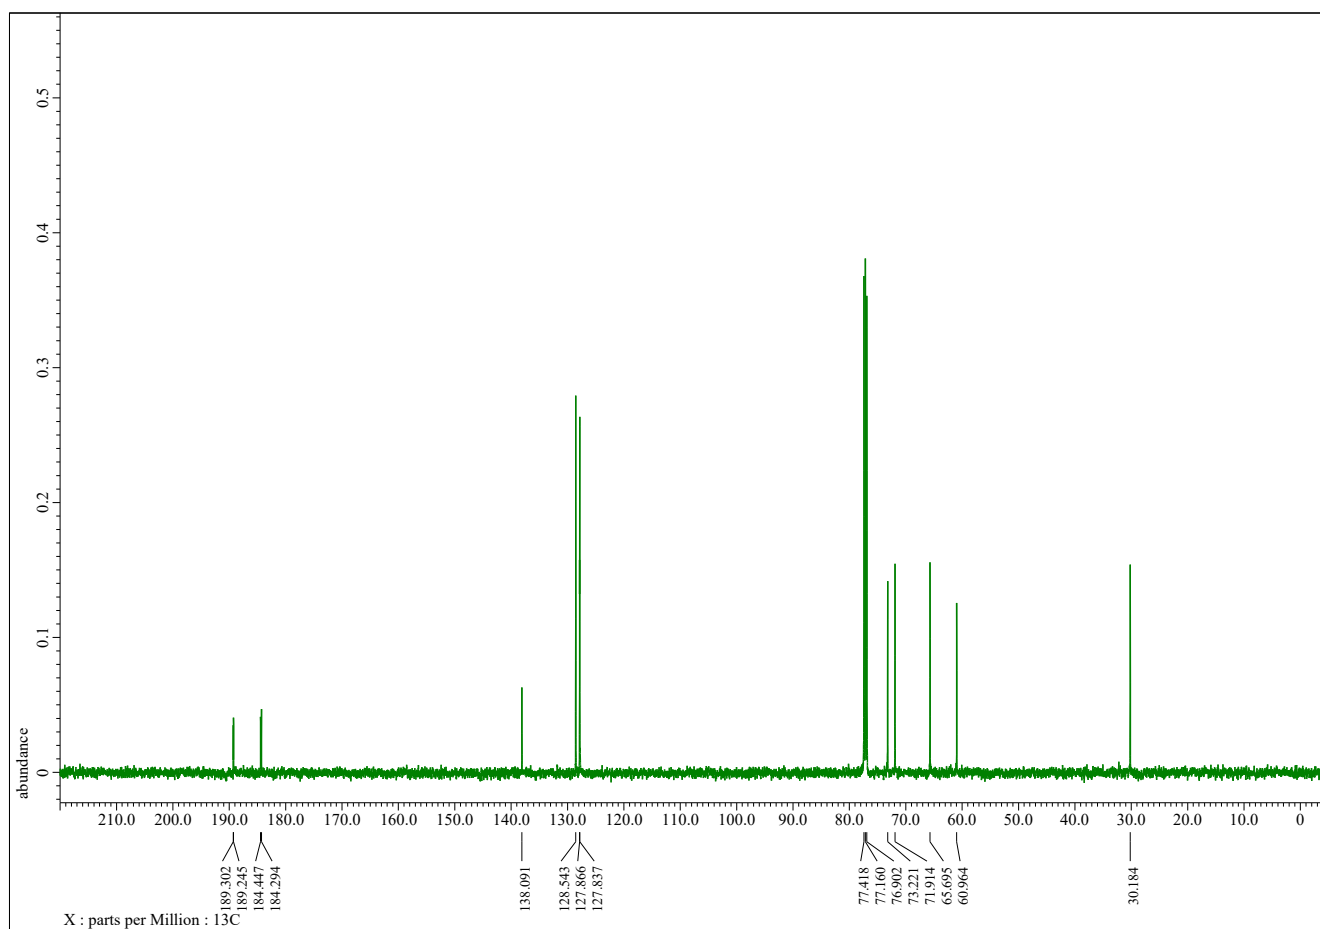

$^1\text{H}/^{13}\text{C}$  NMR spectra of alcohol **3e** (500/126 MHz,  $\text{CDCl}_3$ )

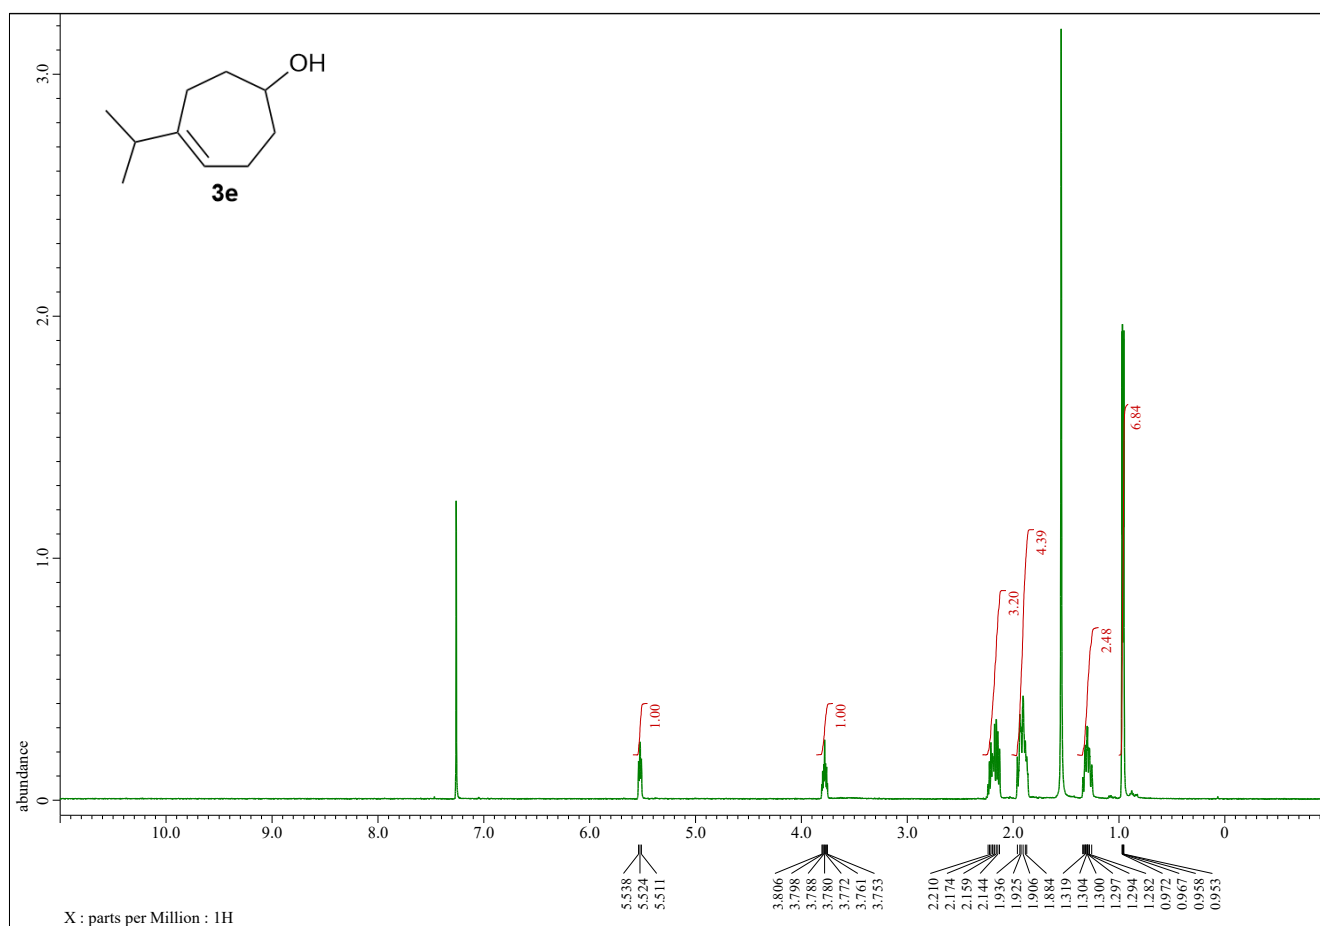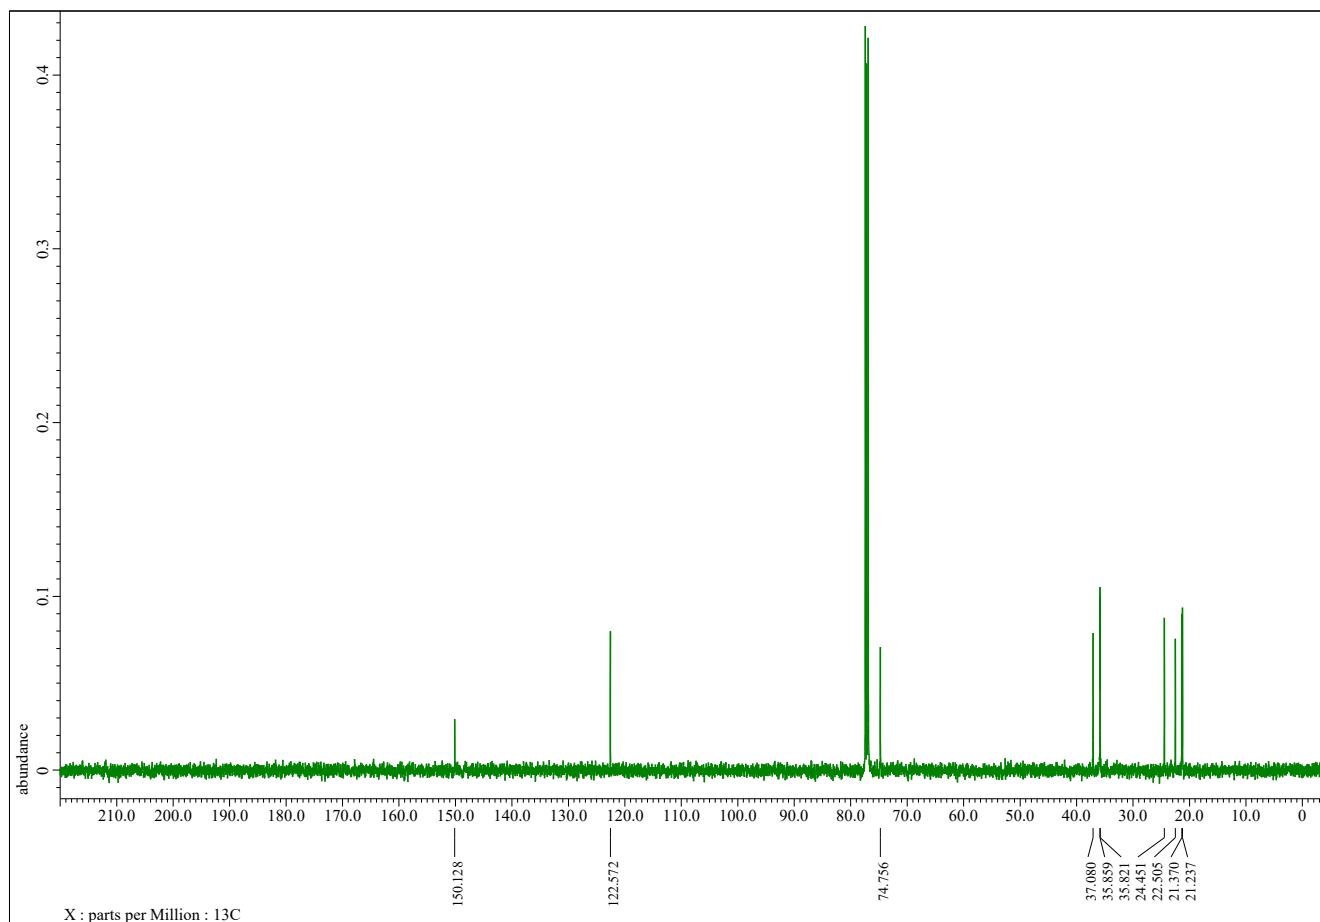

$^1\text{H}/^{13}\text{C}$  NMR spectra of iodoether **6a** (500/126 MHz,  $\text{CDCl}_3$ )

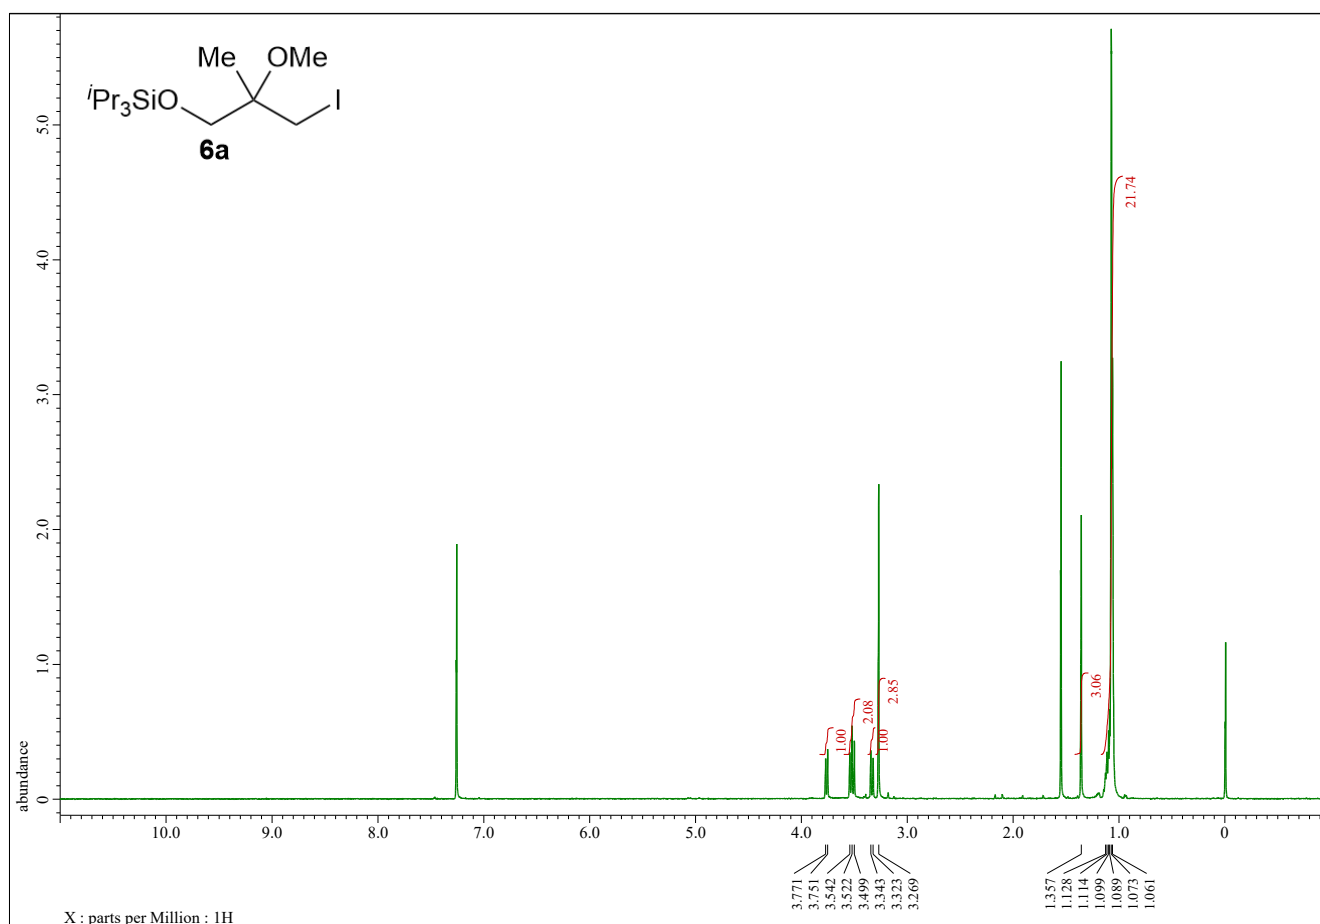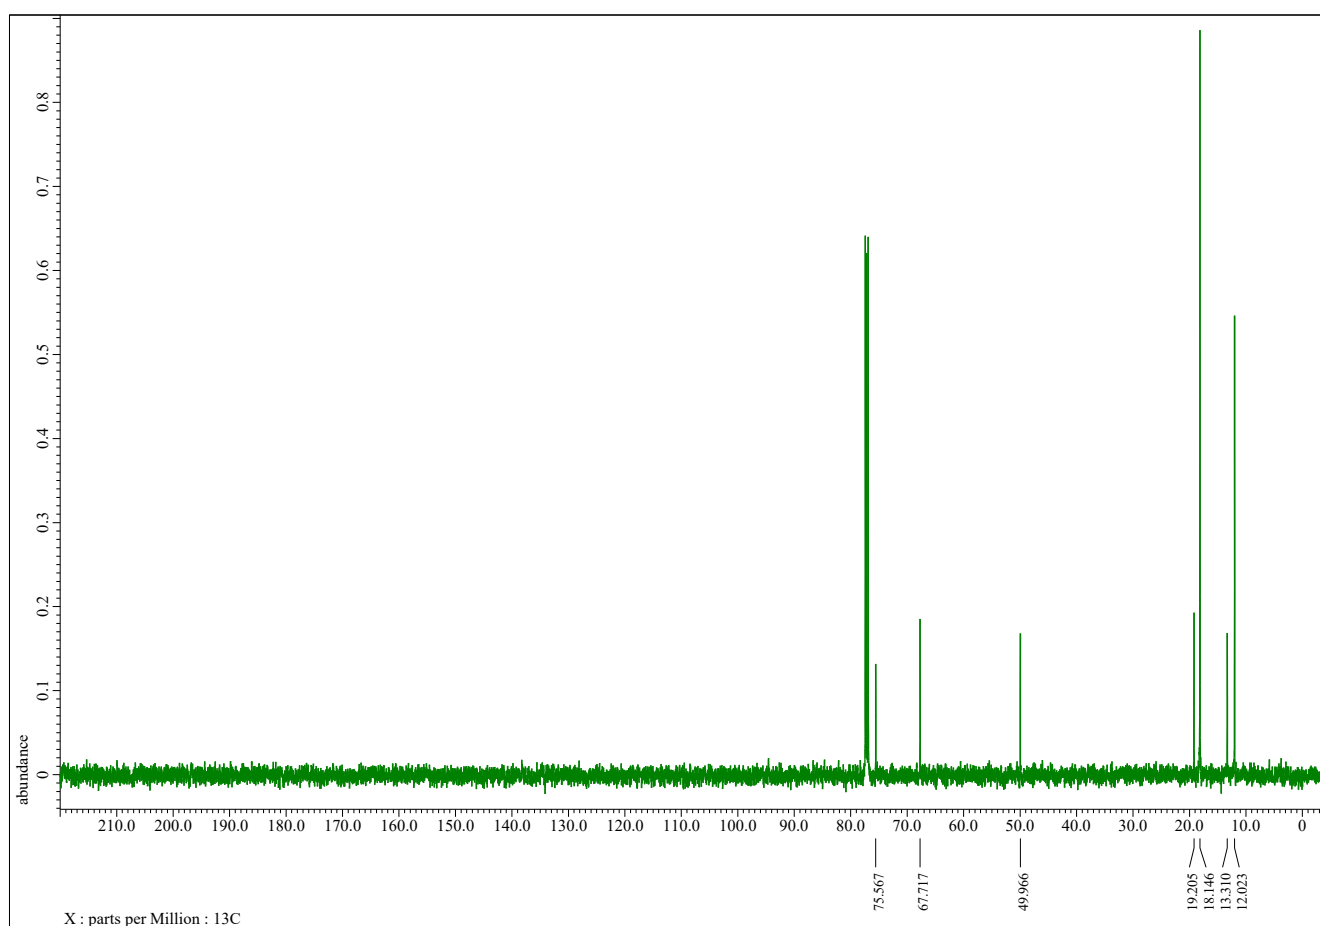

$^1\text{H}/^{13}\text{C}$  NMR spectra of iodoether **6b** (500/126 MHz,  $\text{CDCl}_3$ )

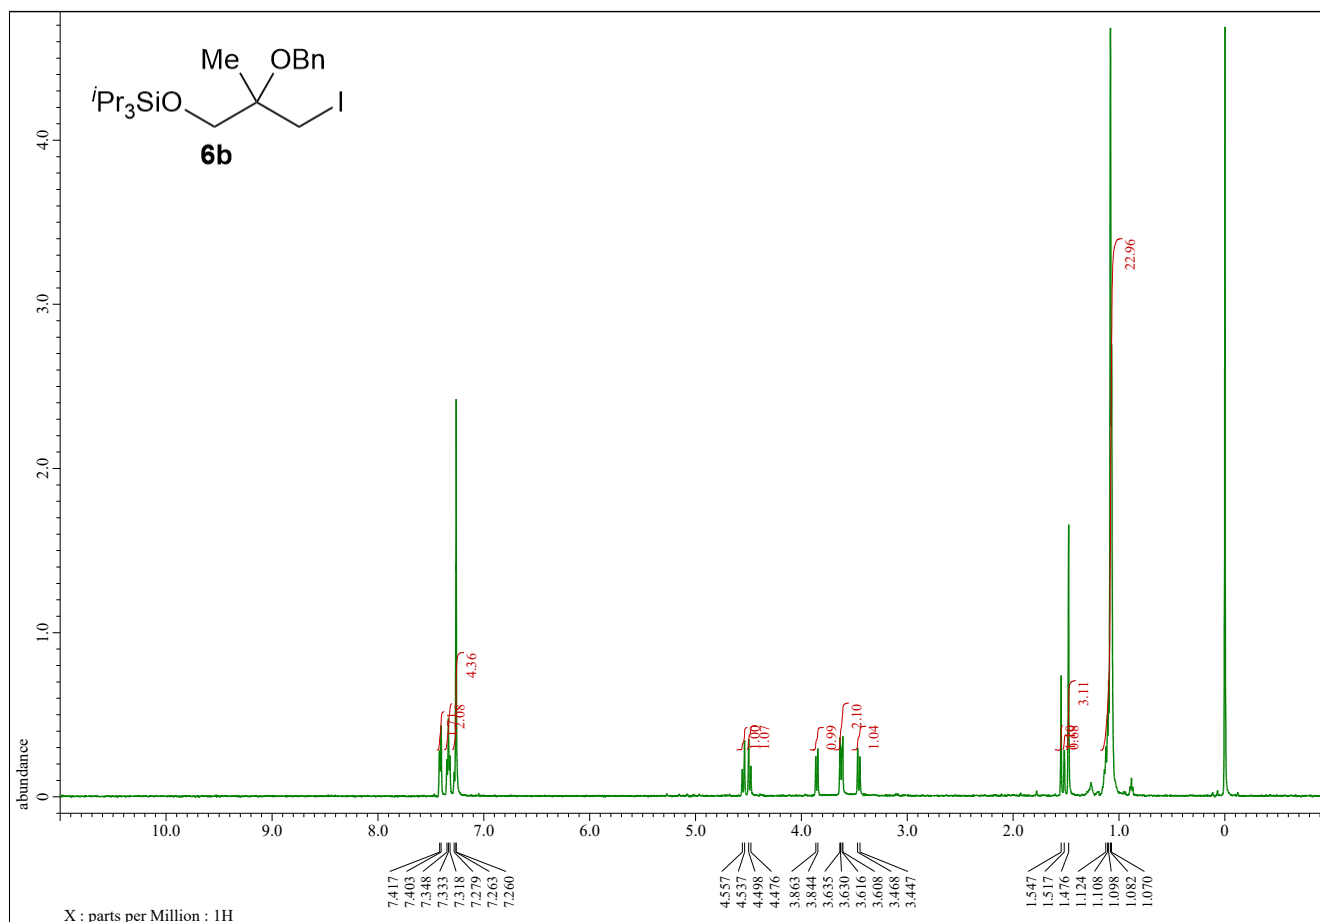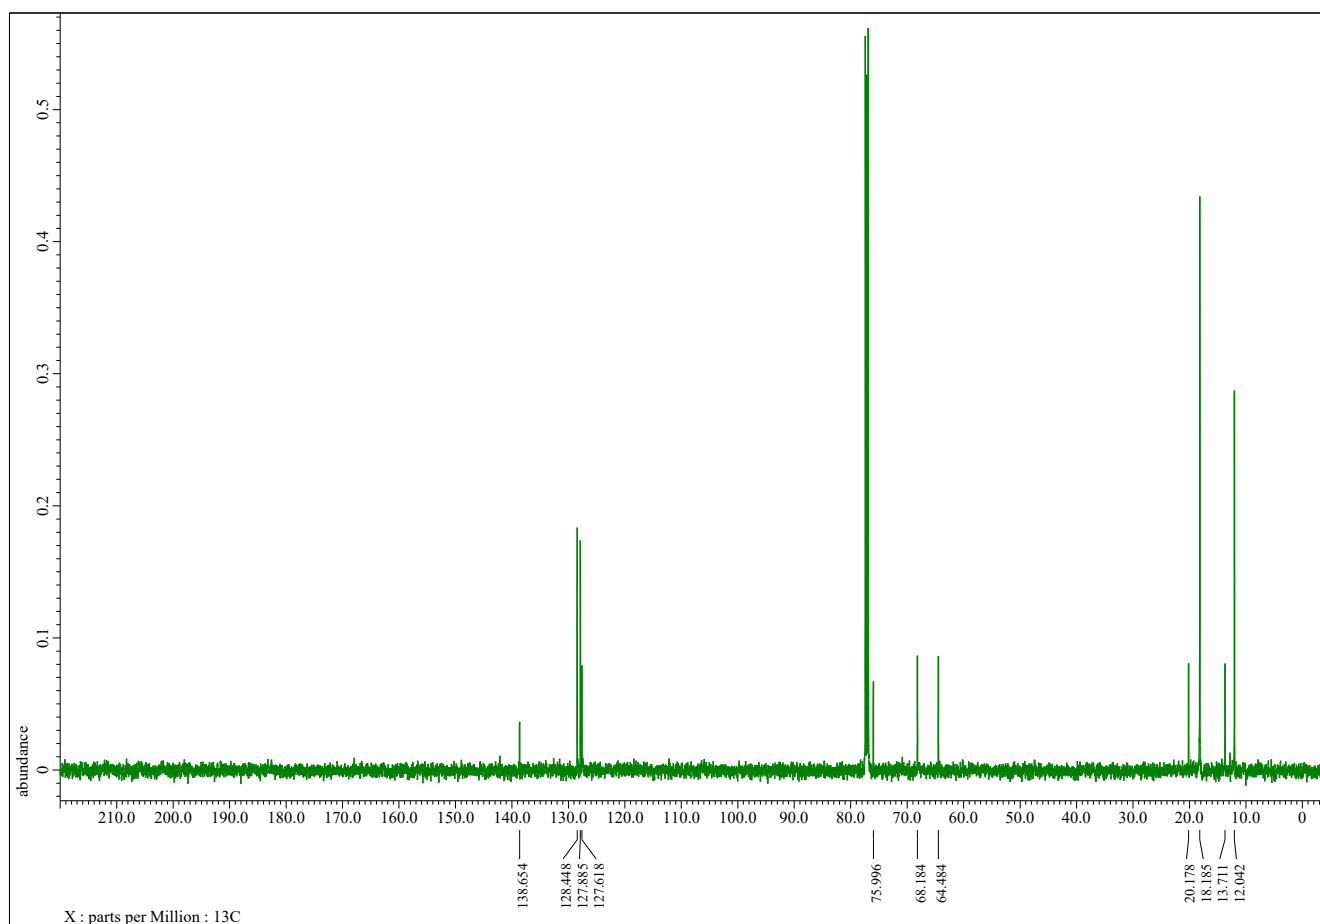

<sup>1</sup>H/<sup>13</sup>C NMR spectra of iodoether **6c** (500/126 MHz, CDCl<sub>3</sub>)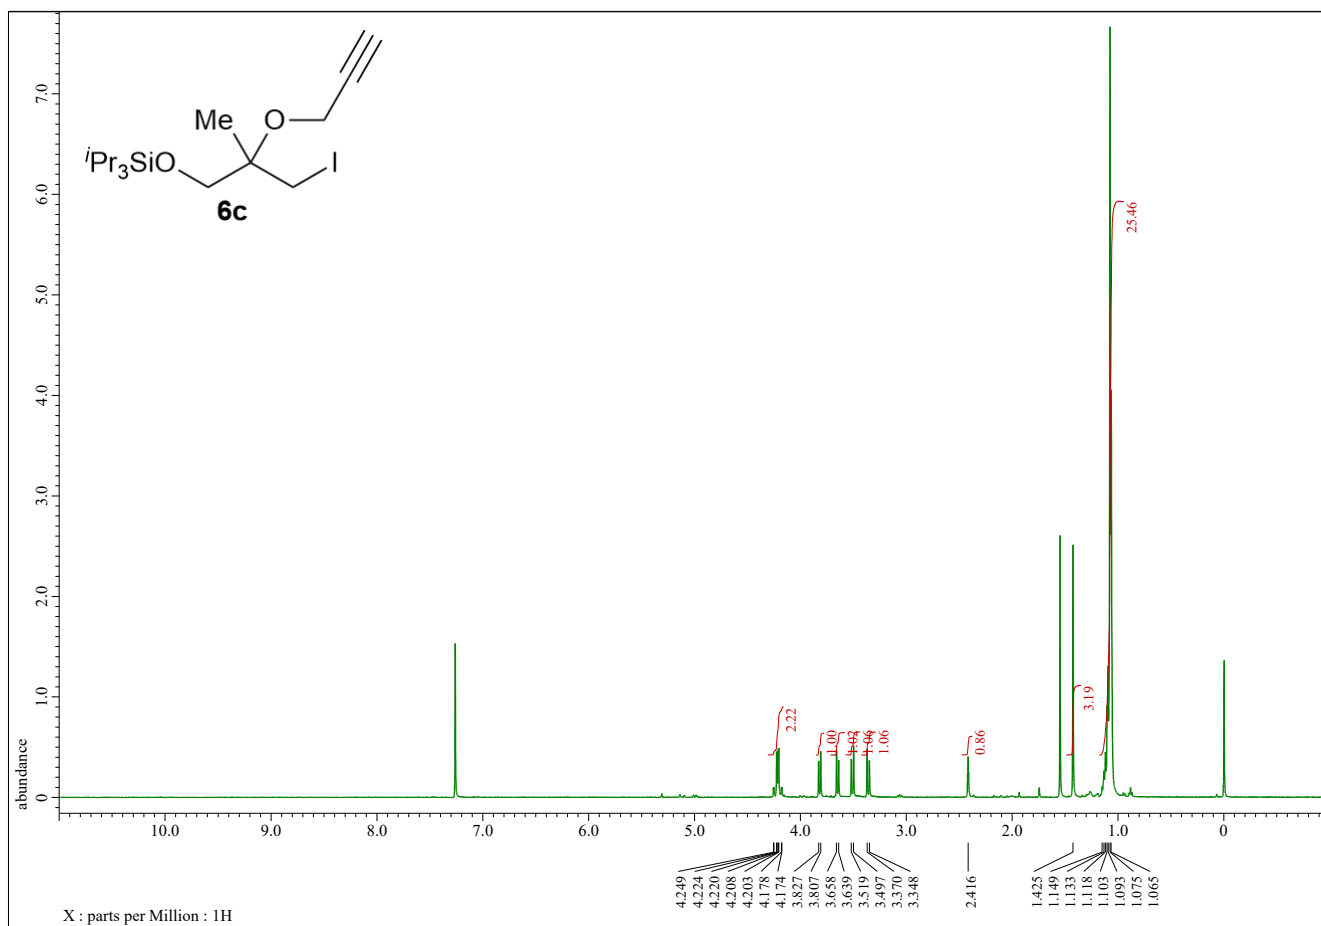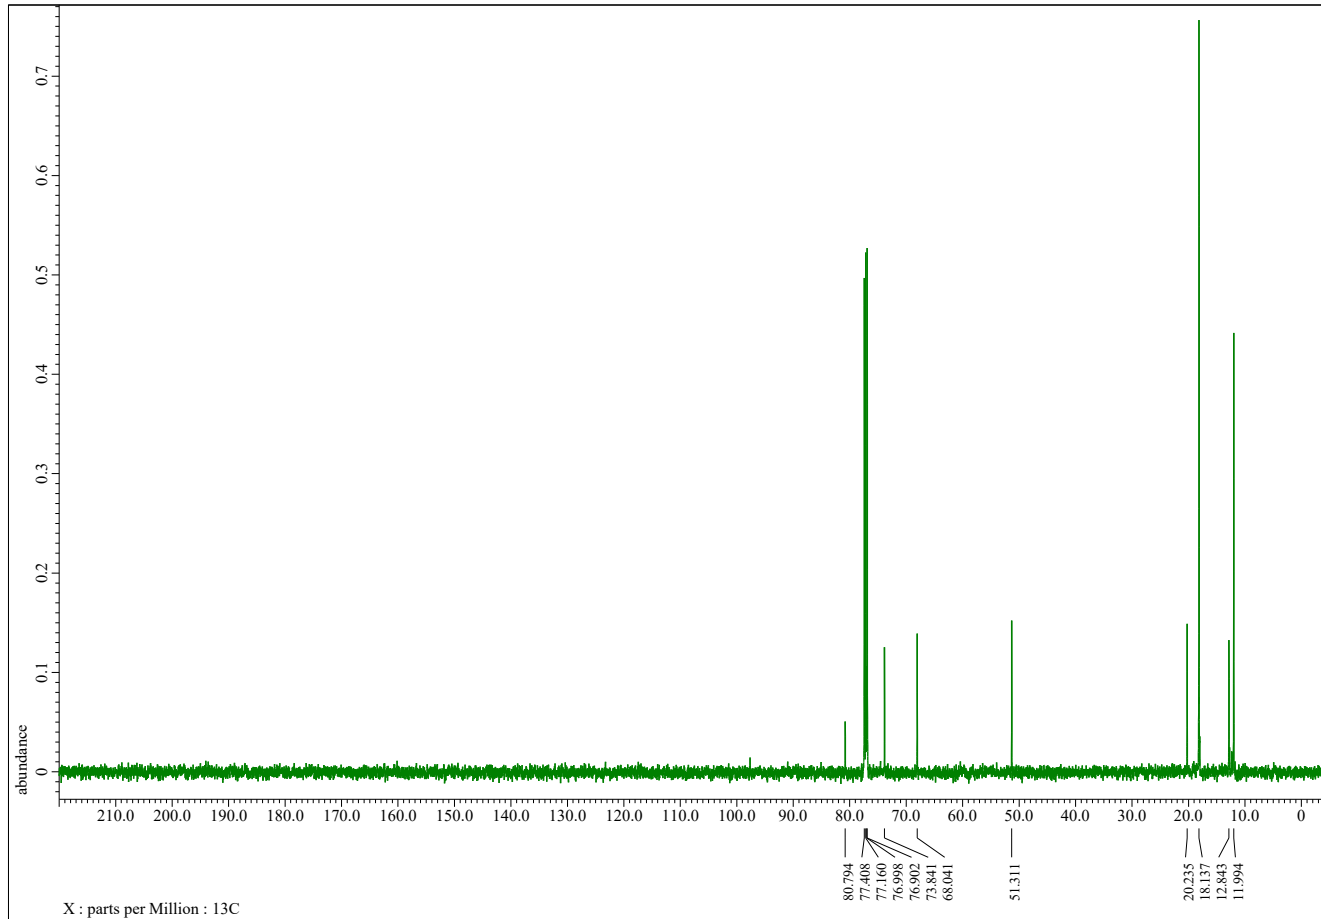

$^1\text{H}/^{13}\text{C}$  NMR spectra of alcohol **7a** (500/126 MHz,  $\text{CDCl}_3$ )

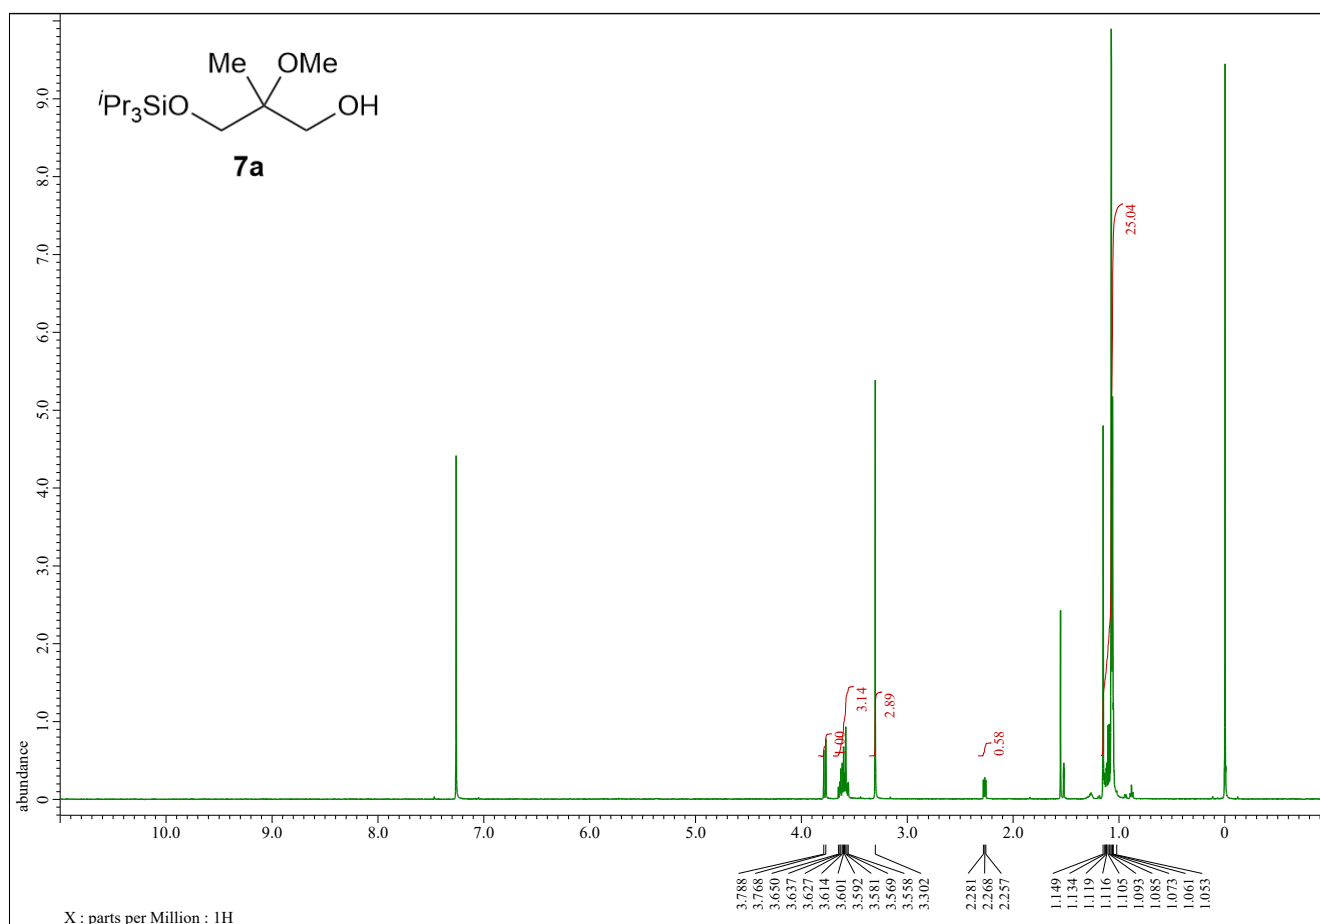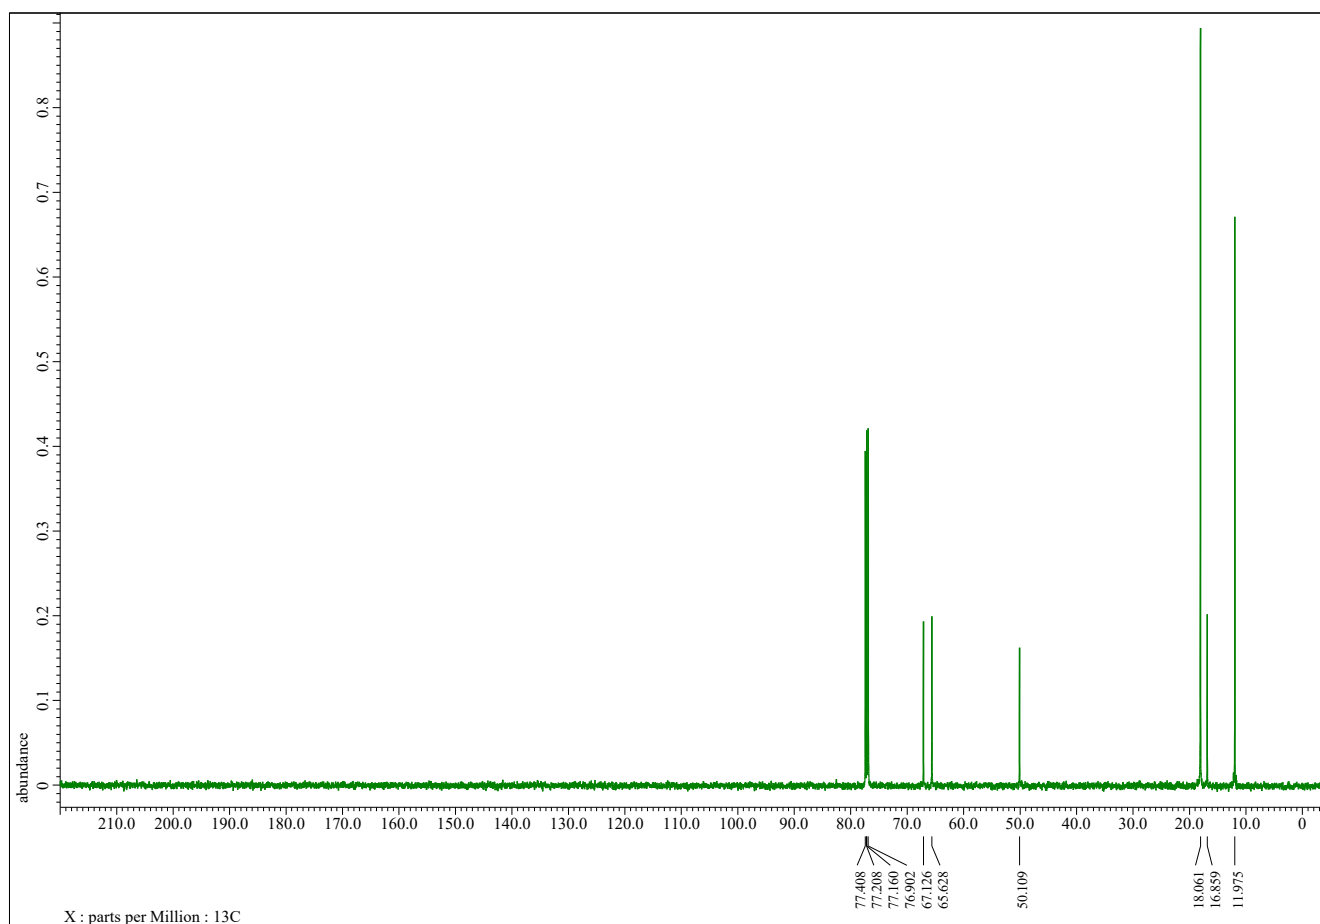

<sup>1</sup>H/<sup>13</sup>C NMR spectra of alcohol **7b** (500/126 MHz, CDCl<sub>3</sub>)

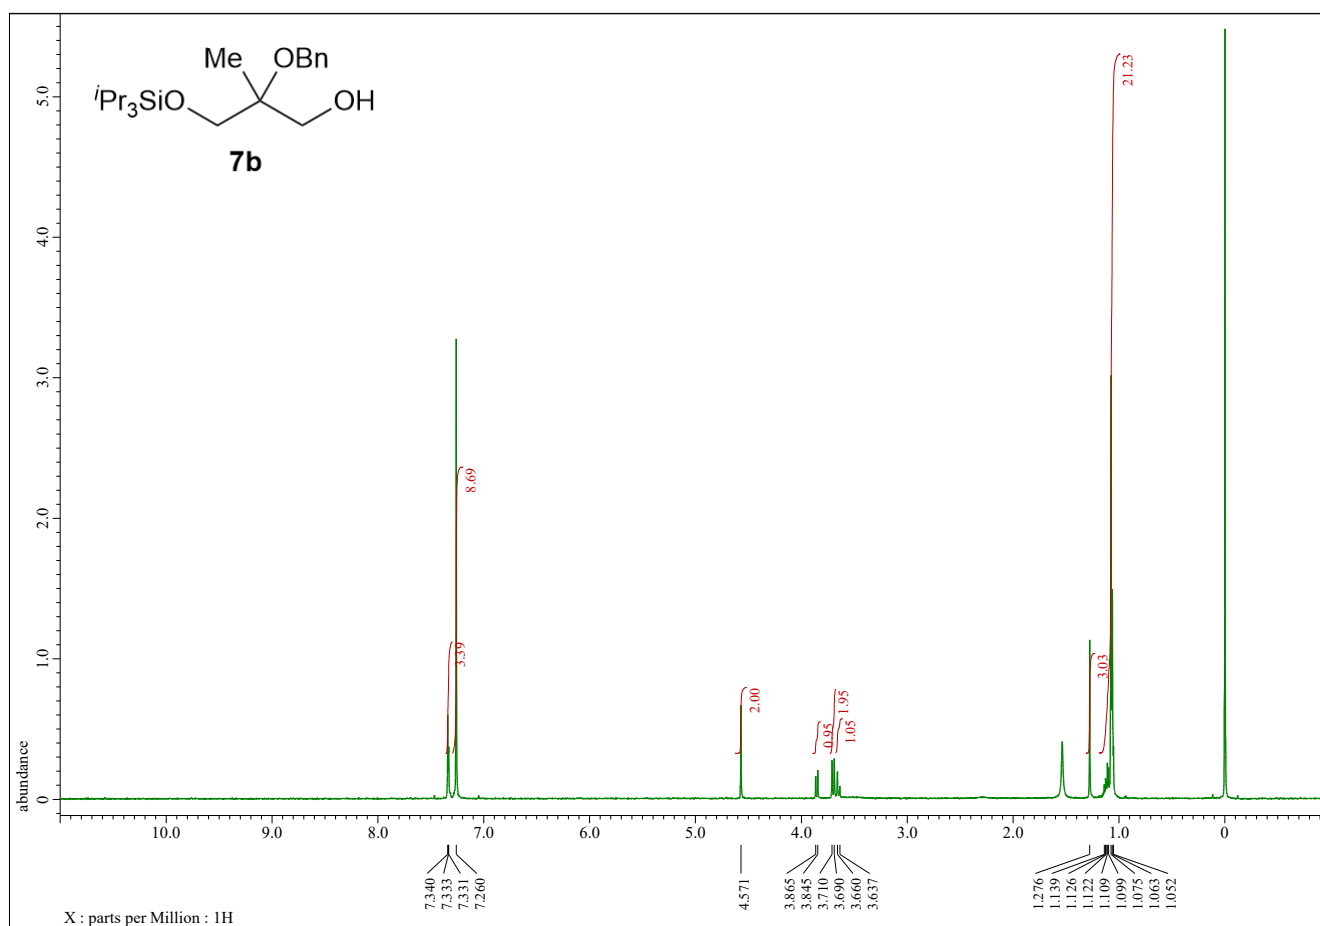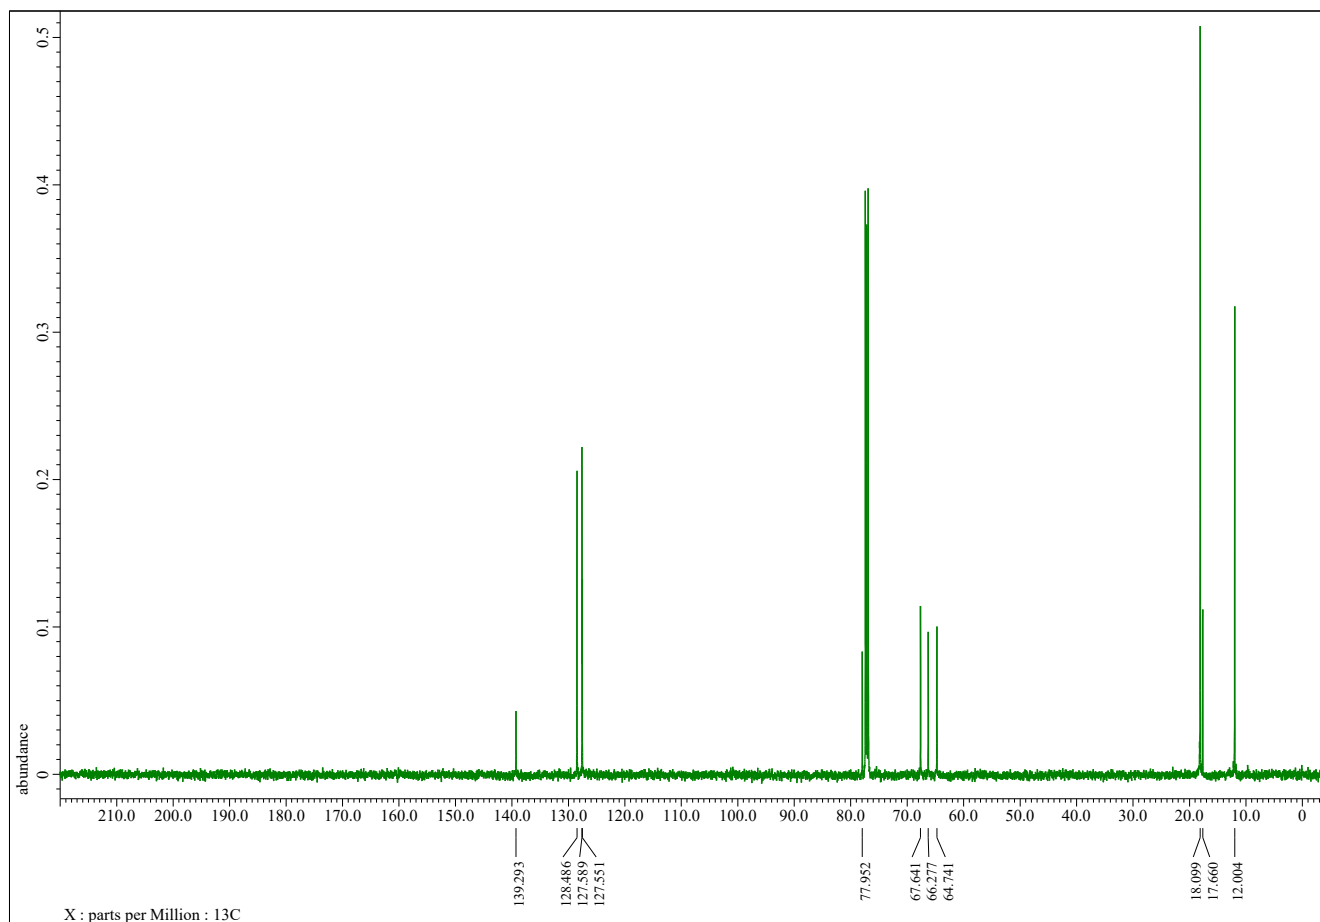

$^1\text{H}/^{13}\text{C}$  NMR spectra alcohol **7c** (500/126 MHz,  $\text{CDCl}_3$ )

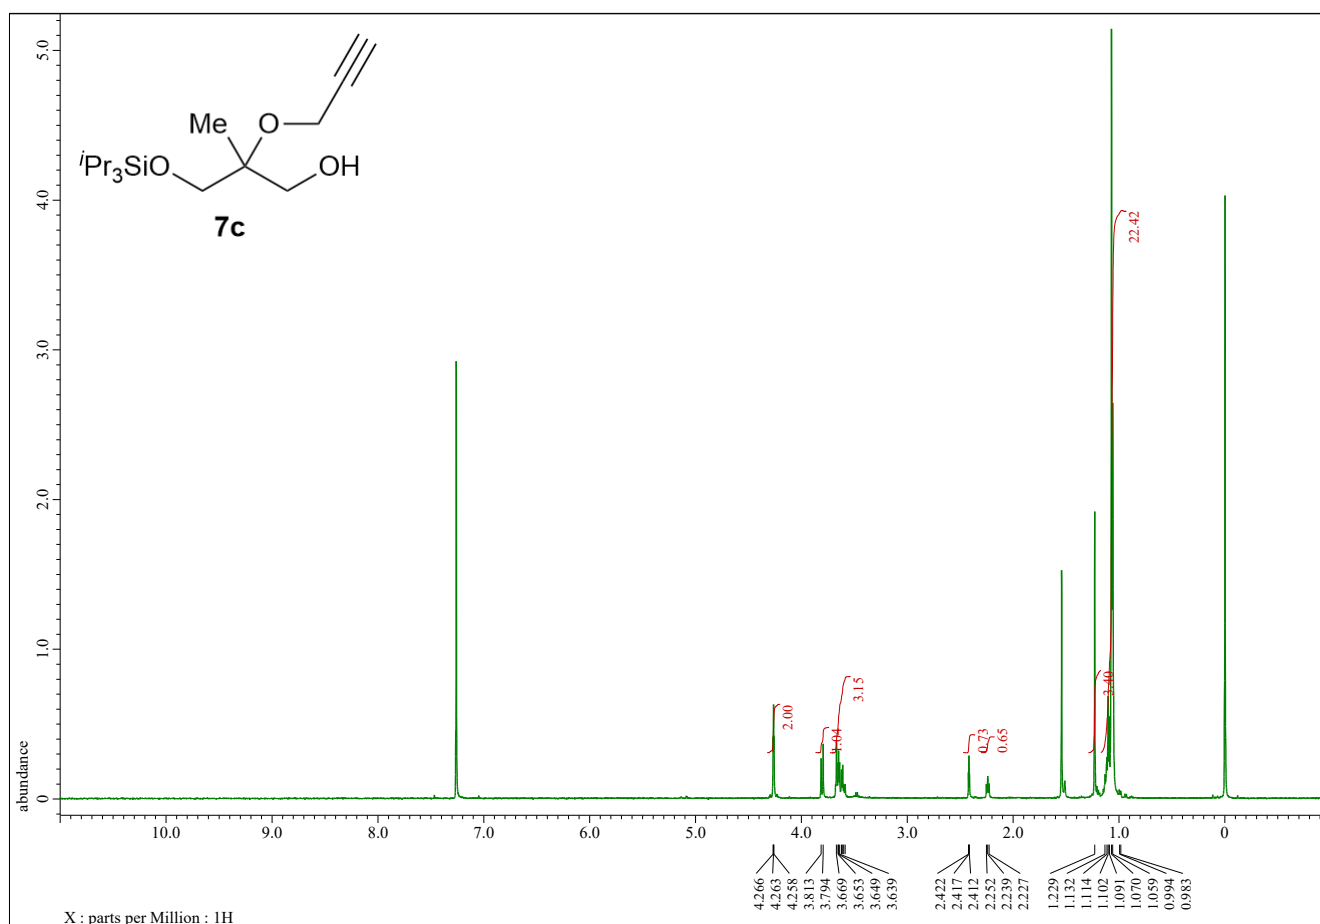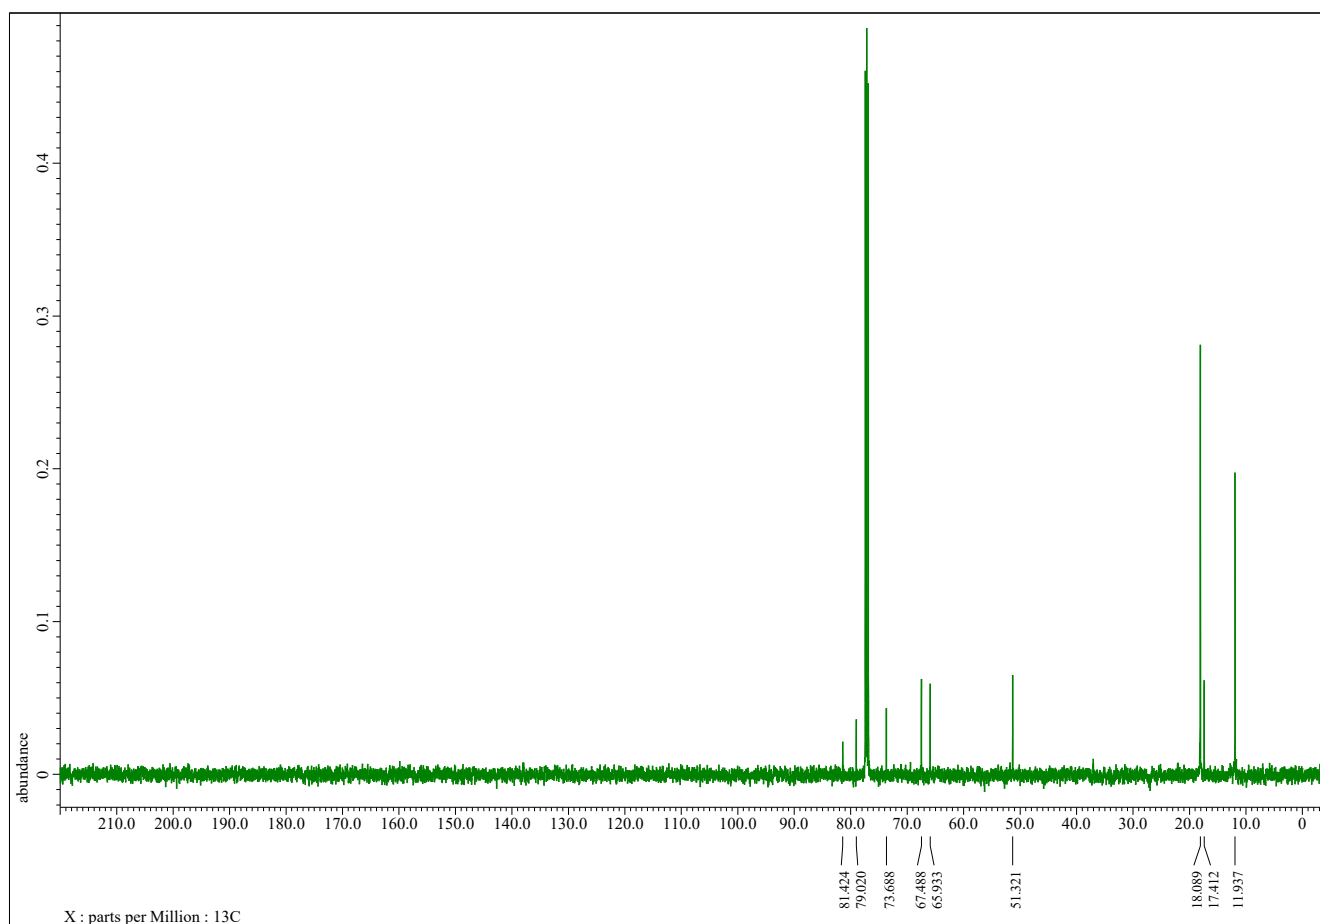



<sup>1</sup>H/<sup>13</sup>C NMR spectra of a 1.8 mixture of **9** and **10** (500/126 MHz, CDCl<sub>3</sub>)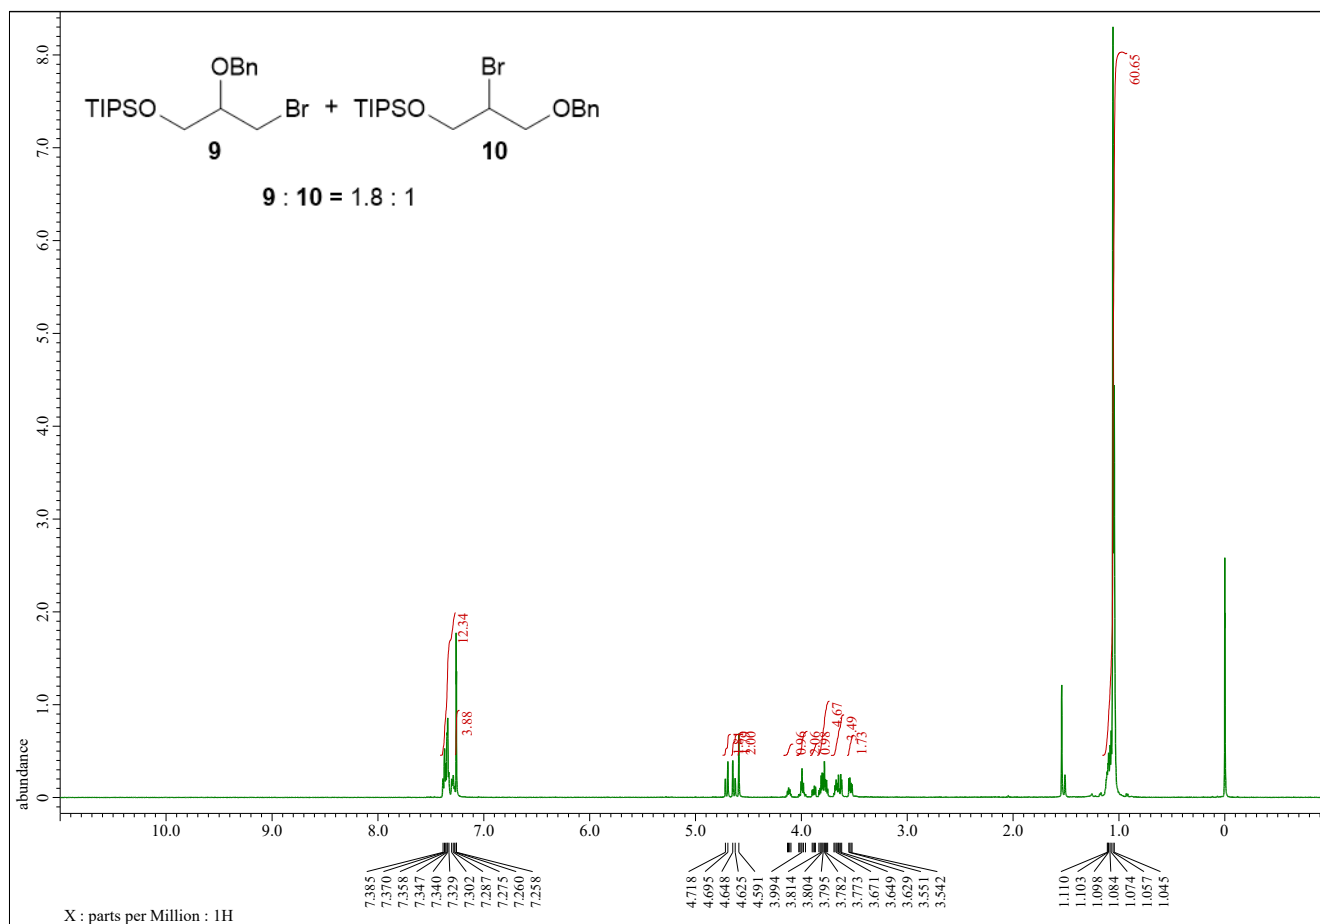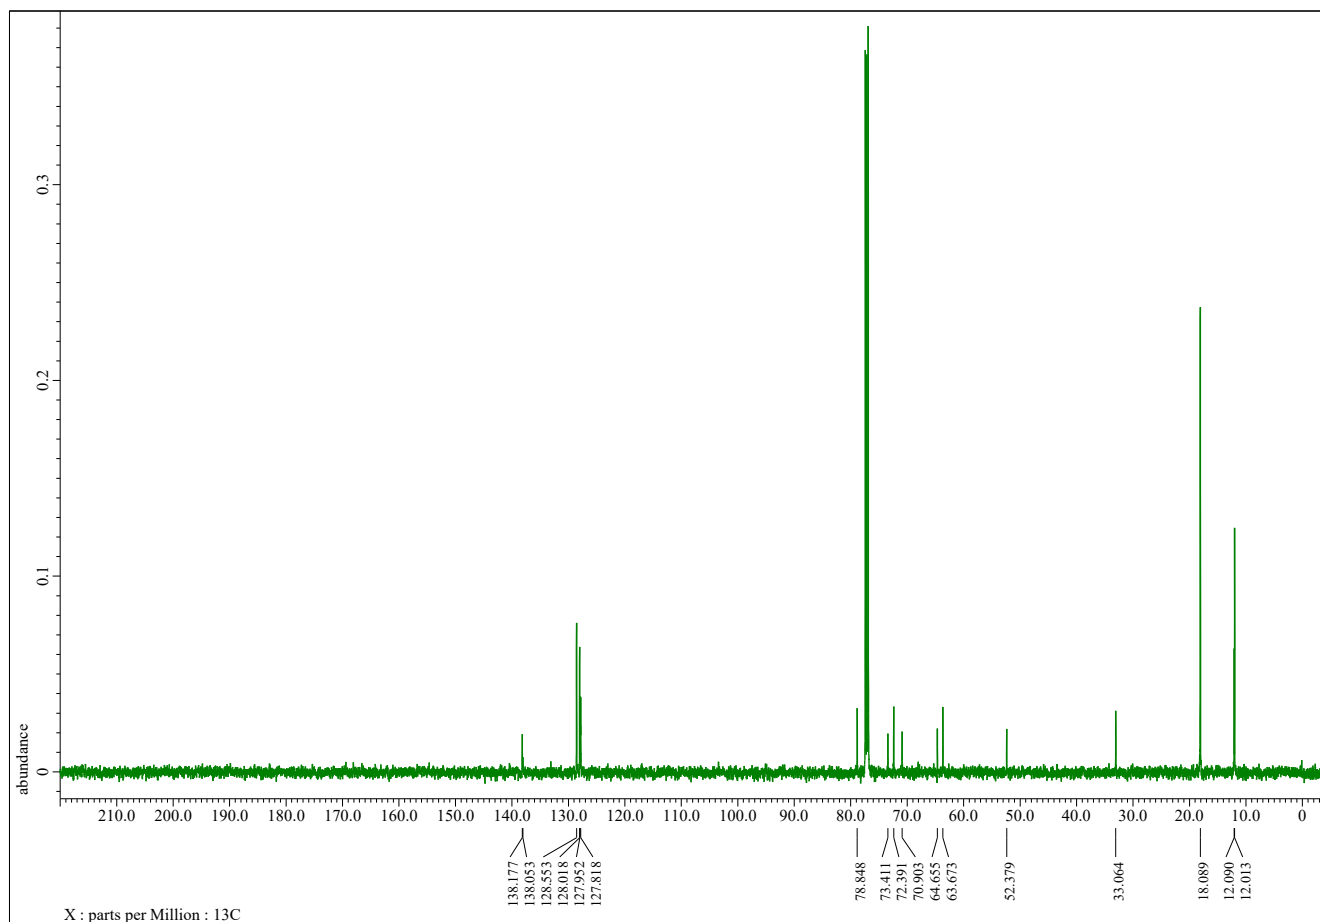

$^1\text{H}/^{13}\text{C}$  NMR spectra of secondary bromide **10** (500/126 MHz,  $\text{CDCl}_3$ )

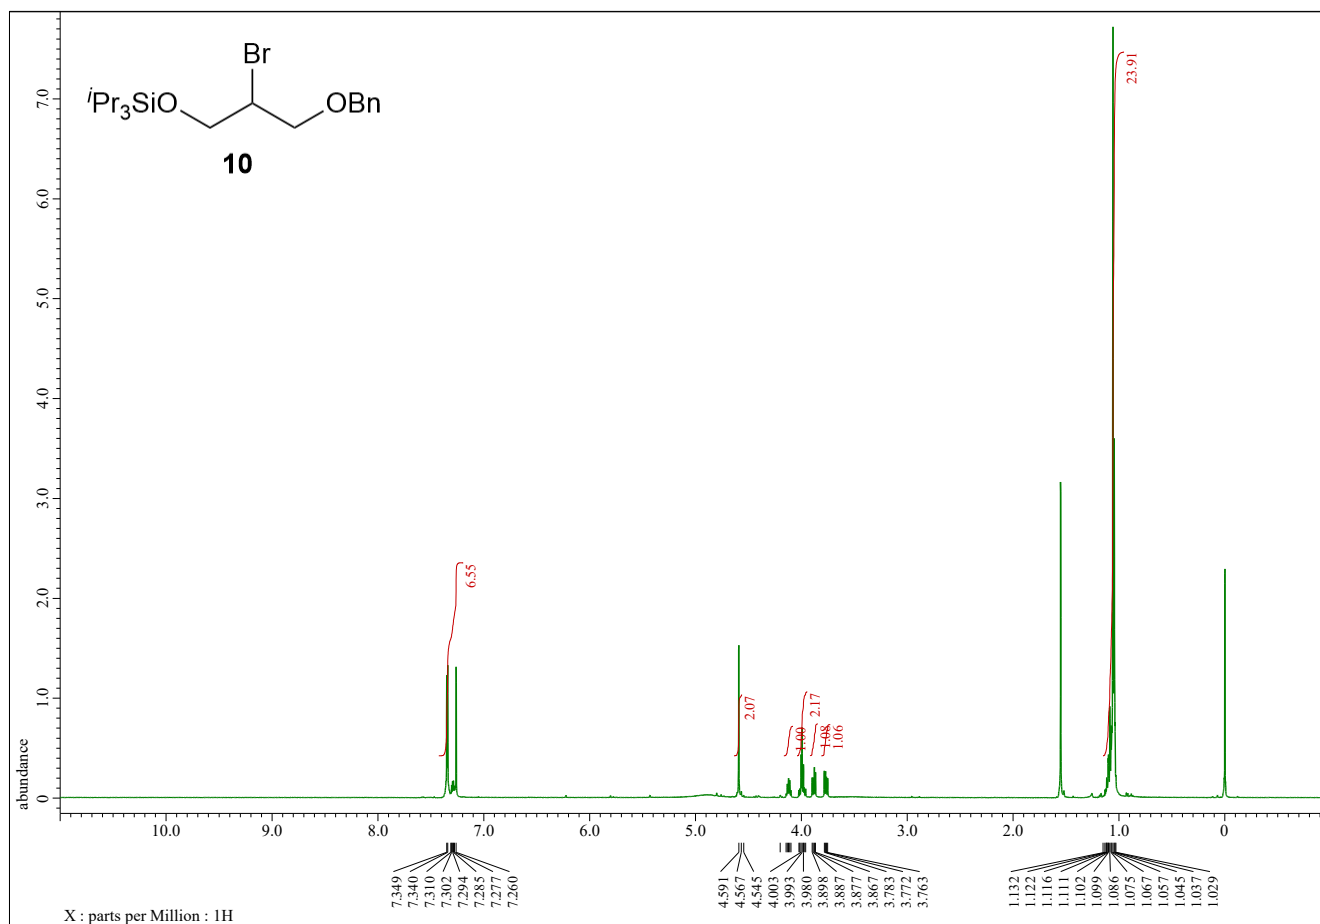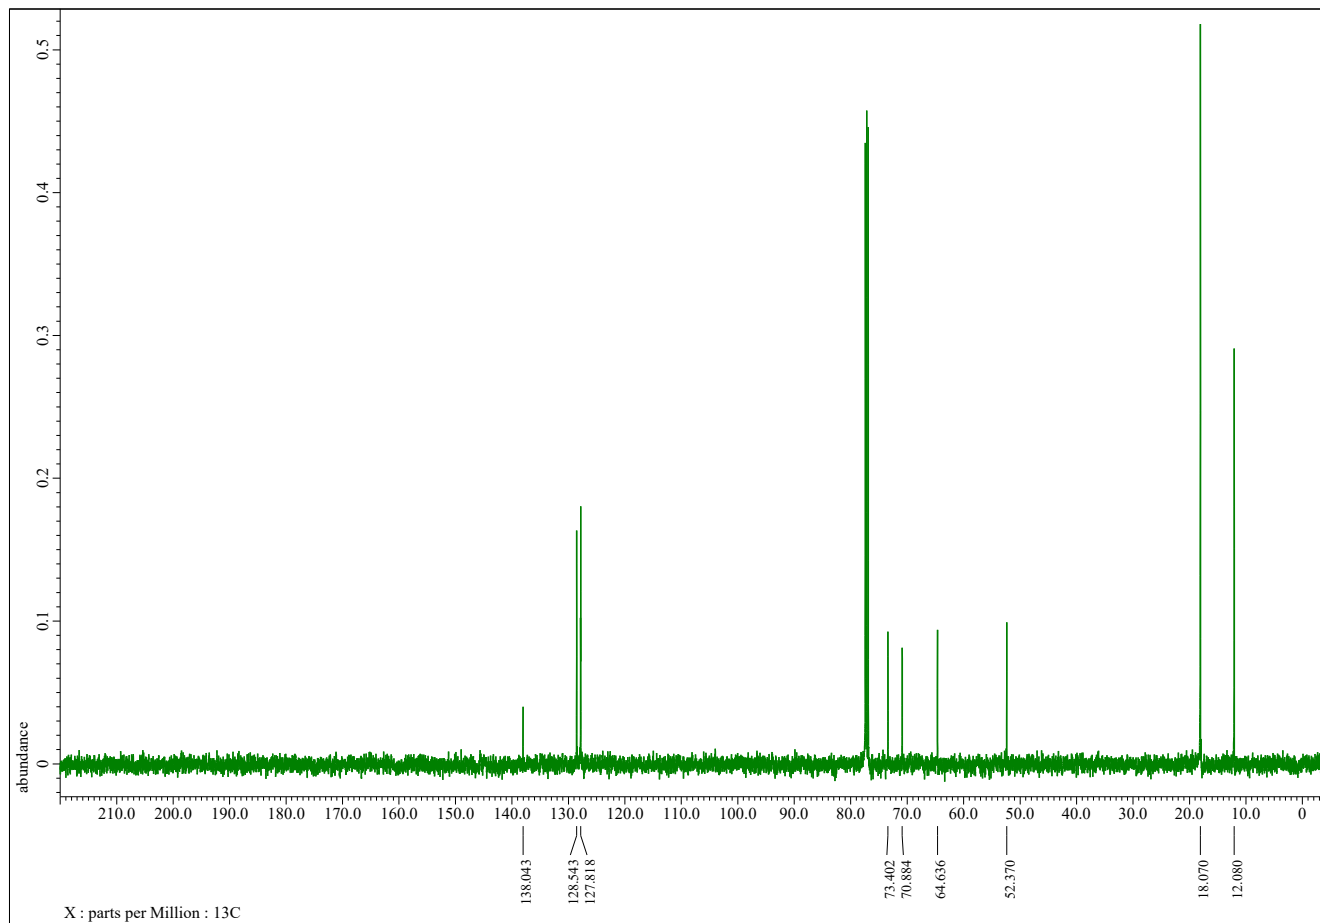

$^1\text{H}/^{13}\text{C}$  NMR spectra of primary alcohol **11** (500/126 MHz,  $\text{CDCl}_3$ )

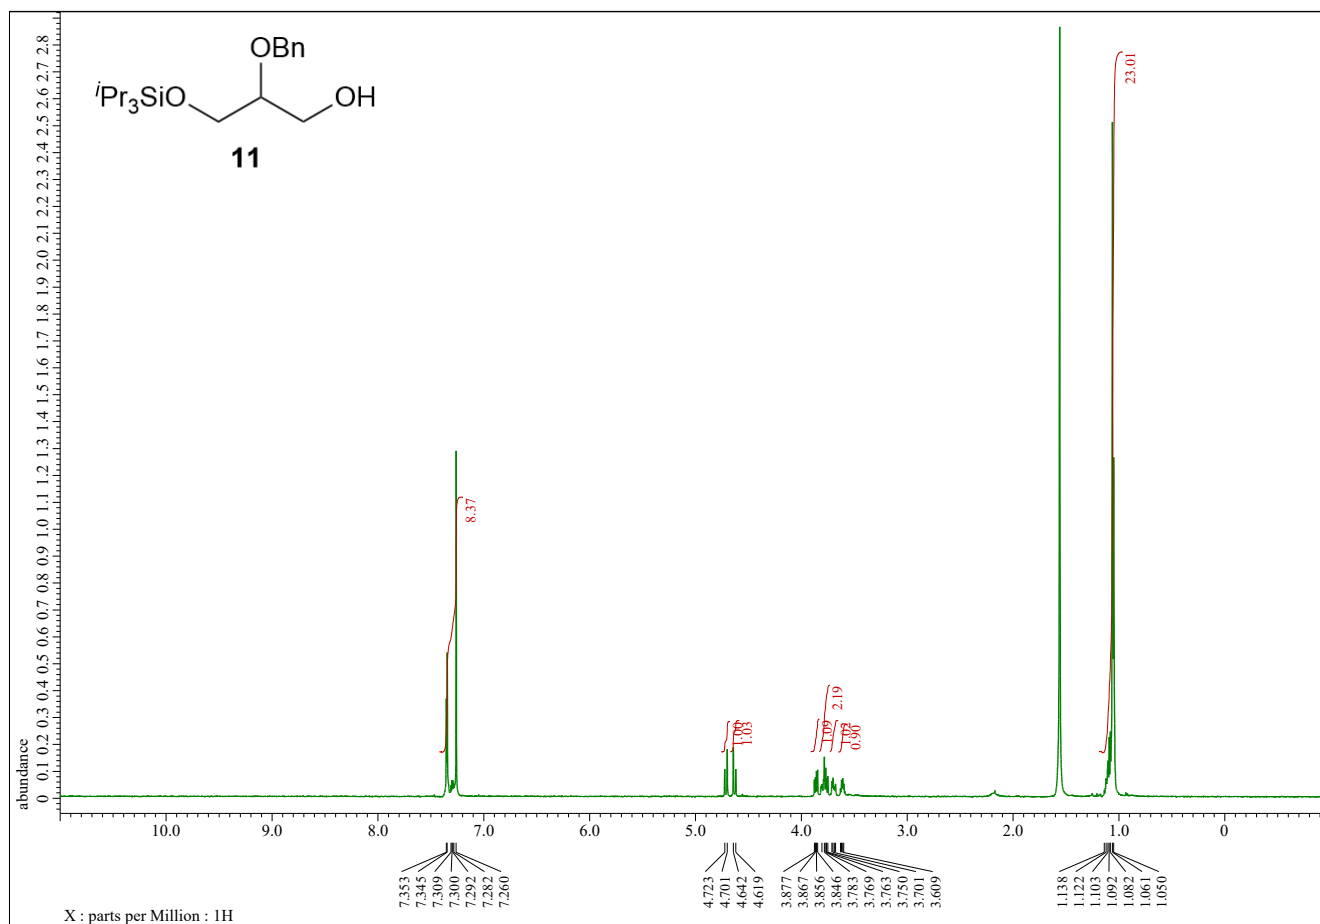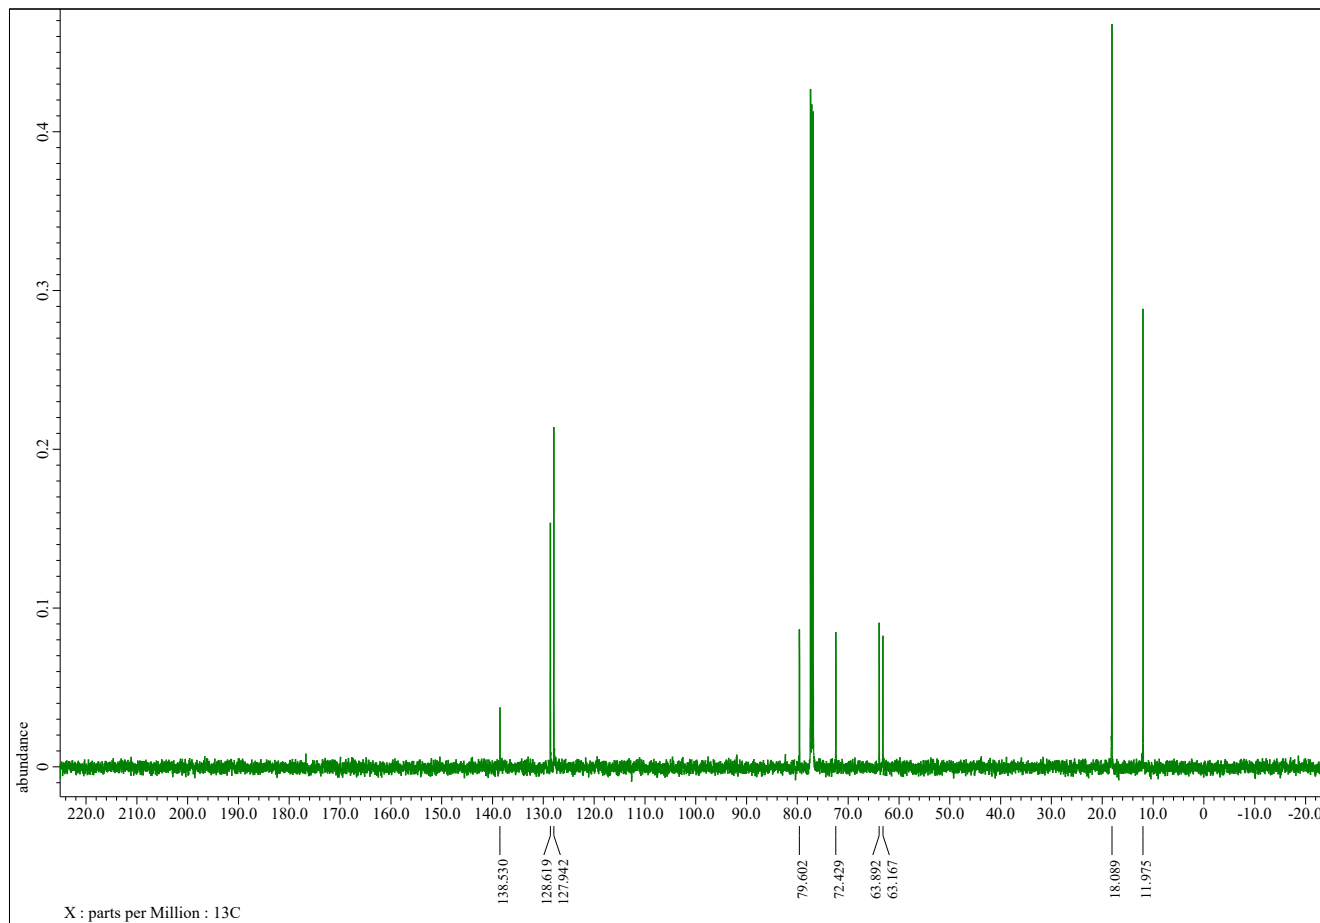

$^1\text{H}/^{13}\text{C}$  NMR spectra of secondary alcohol **12** (500/126 MHz,  $\text{CDCl}_3$ )

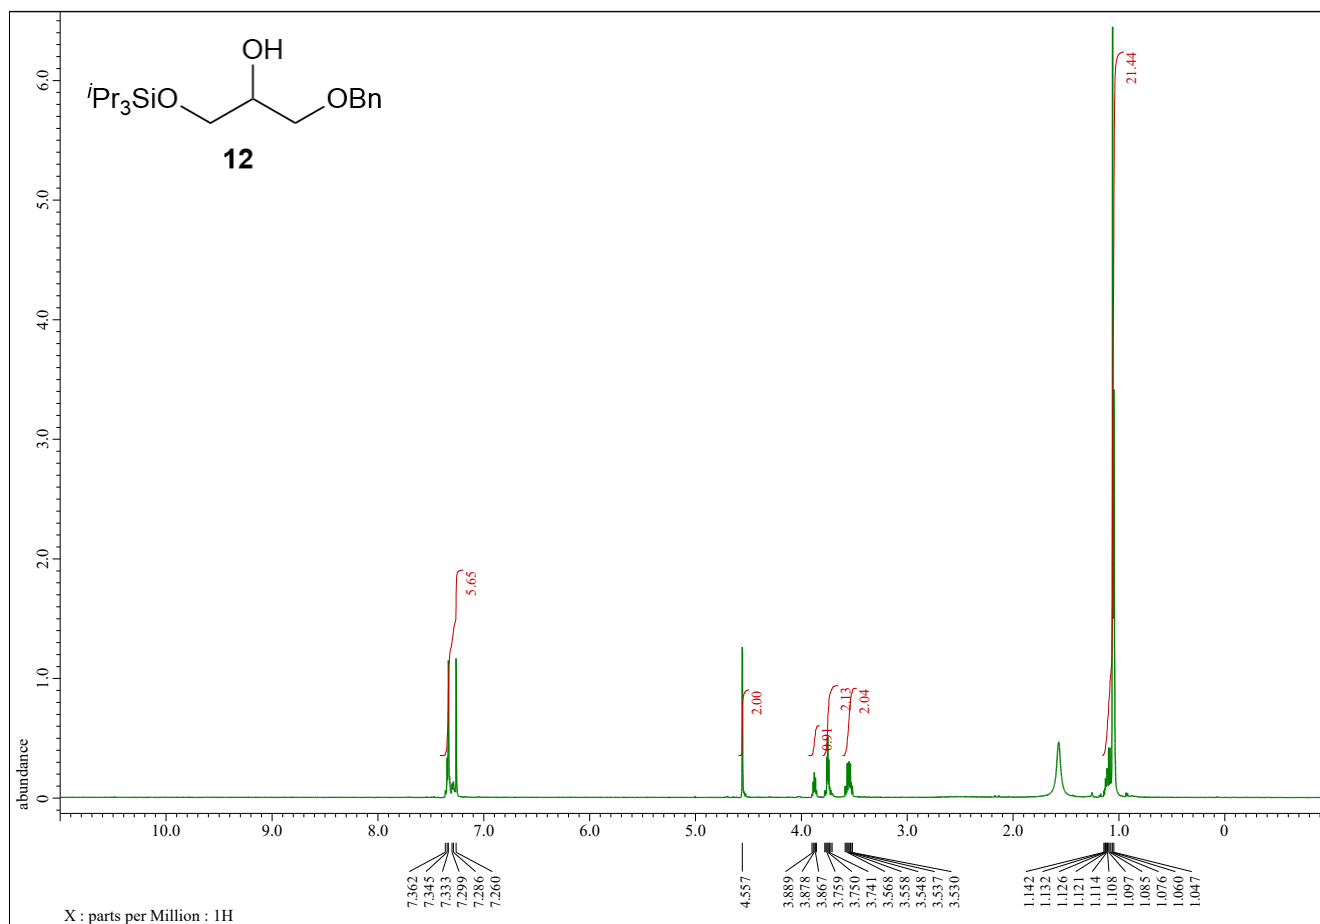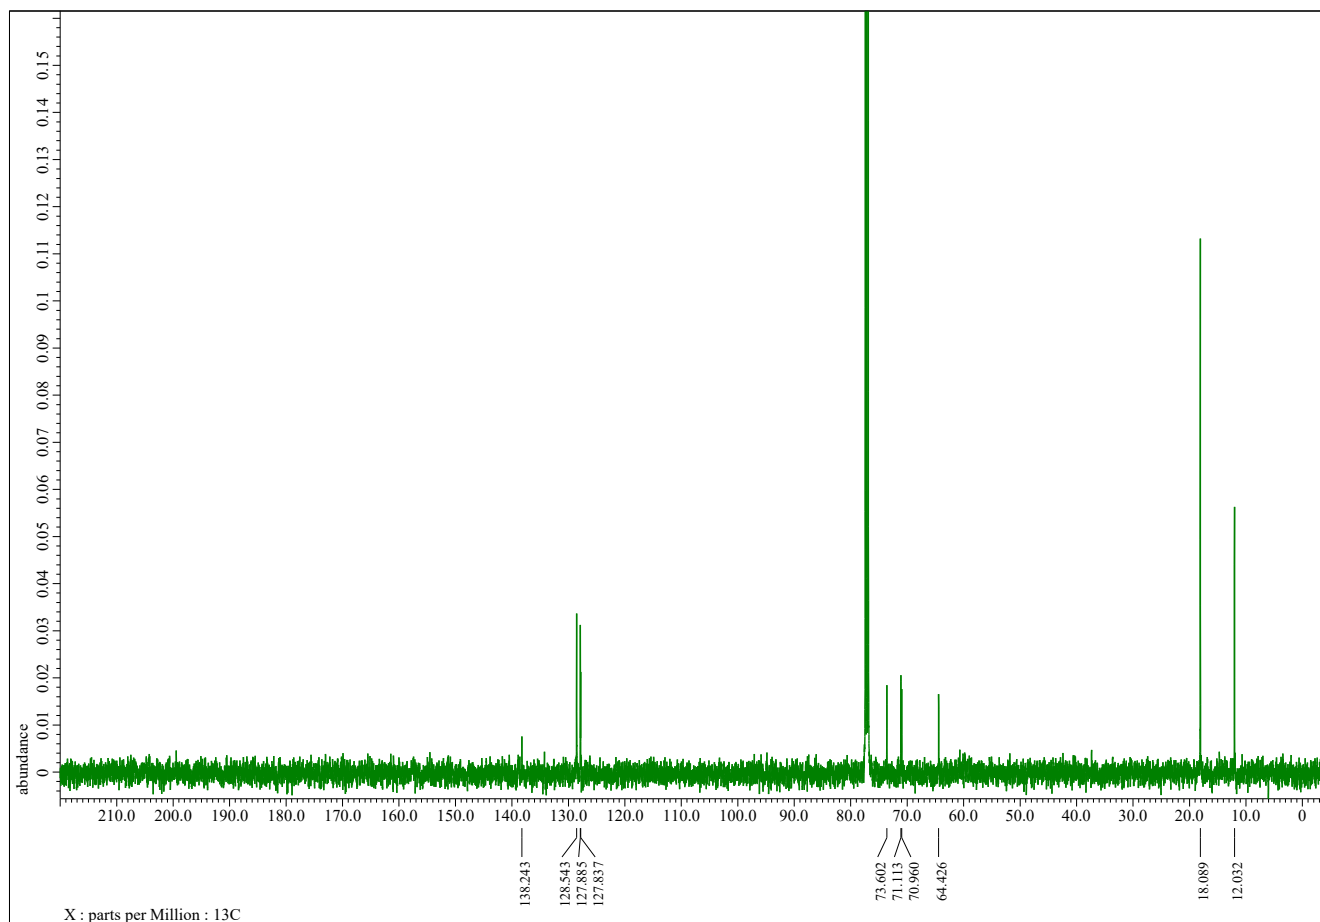

$^1\text{H}/^{13}\text{C}$  NMR spectra of dibromide **14** (500/126 MHz,  $\text{CDCl}_3$ )

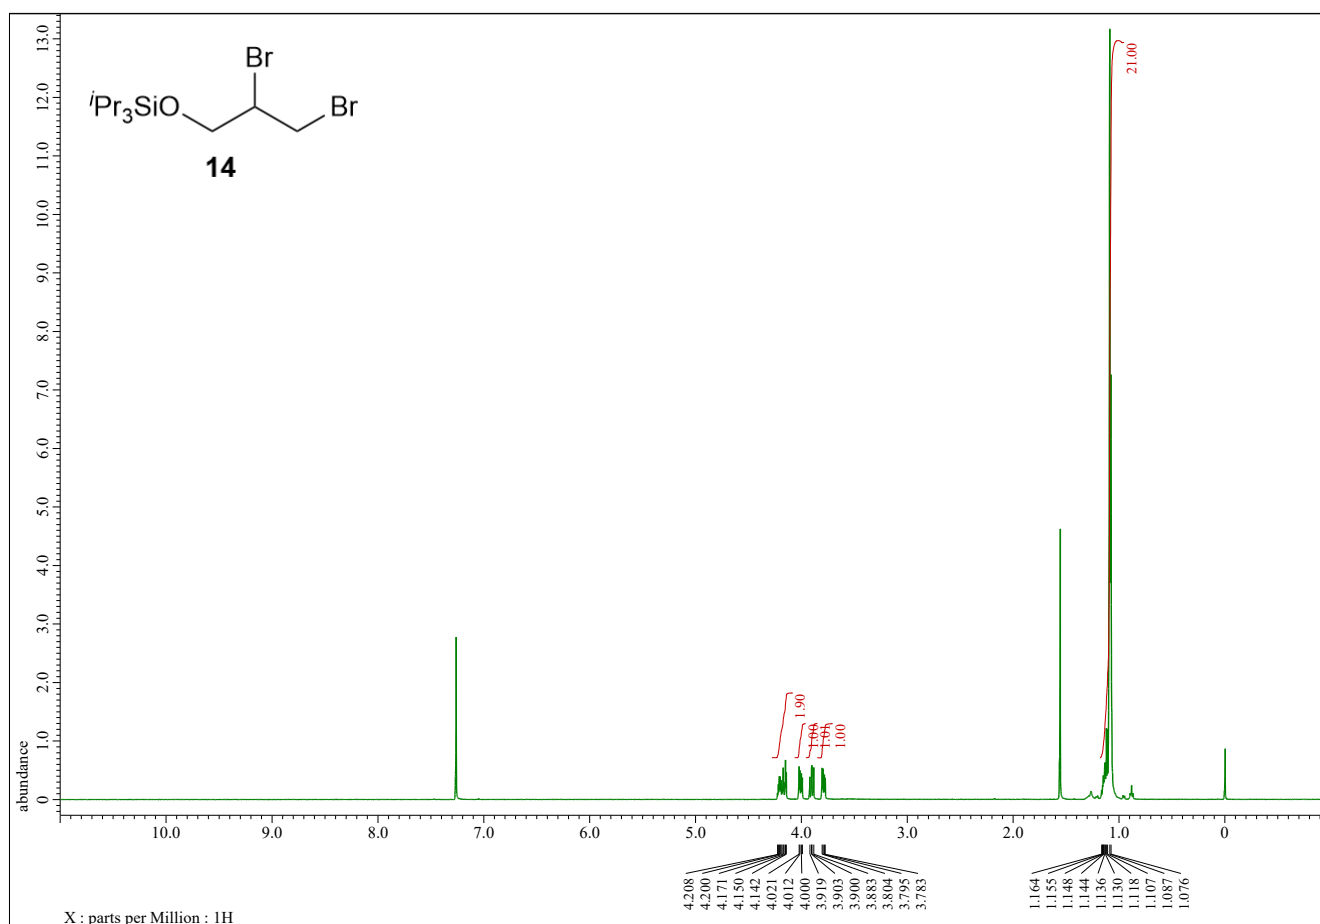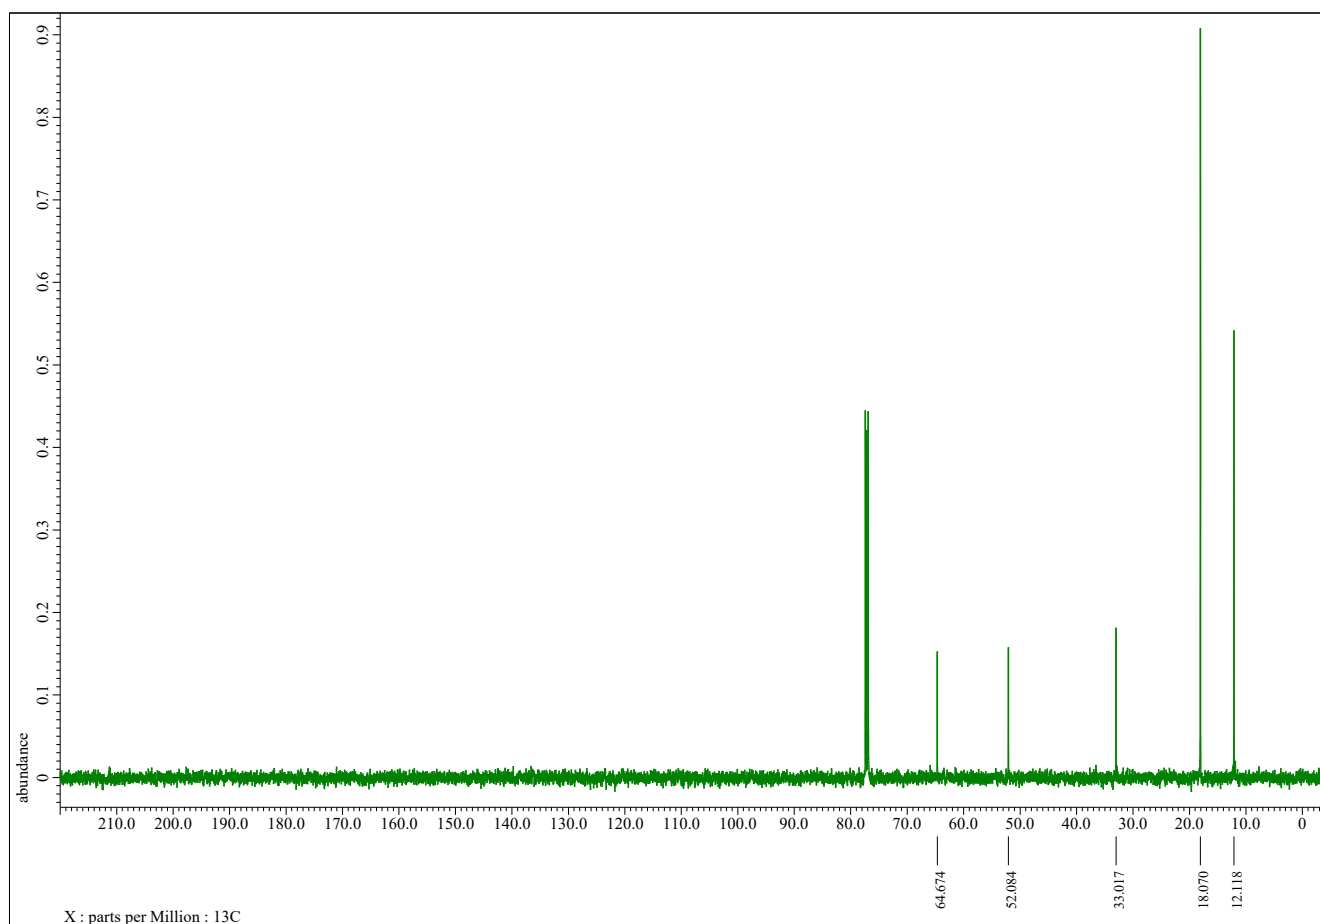

<sup>1</sup>H/<sup>13</sup>C NMR spectra of bromohydrin **16** (500/126 MHz, CDCl<sub>3</sub>)

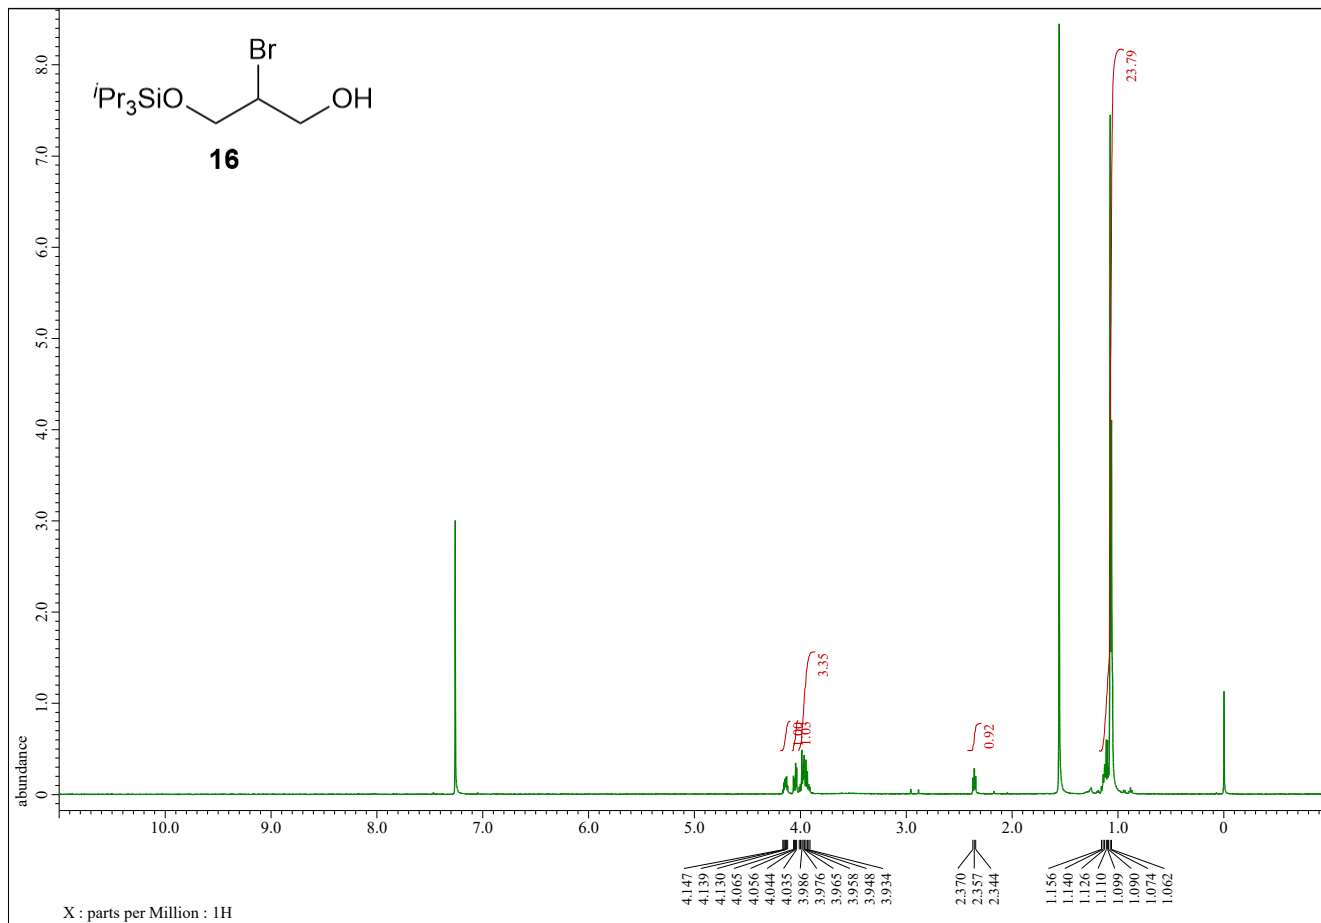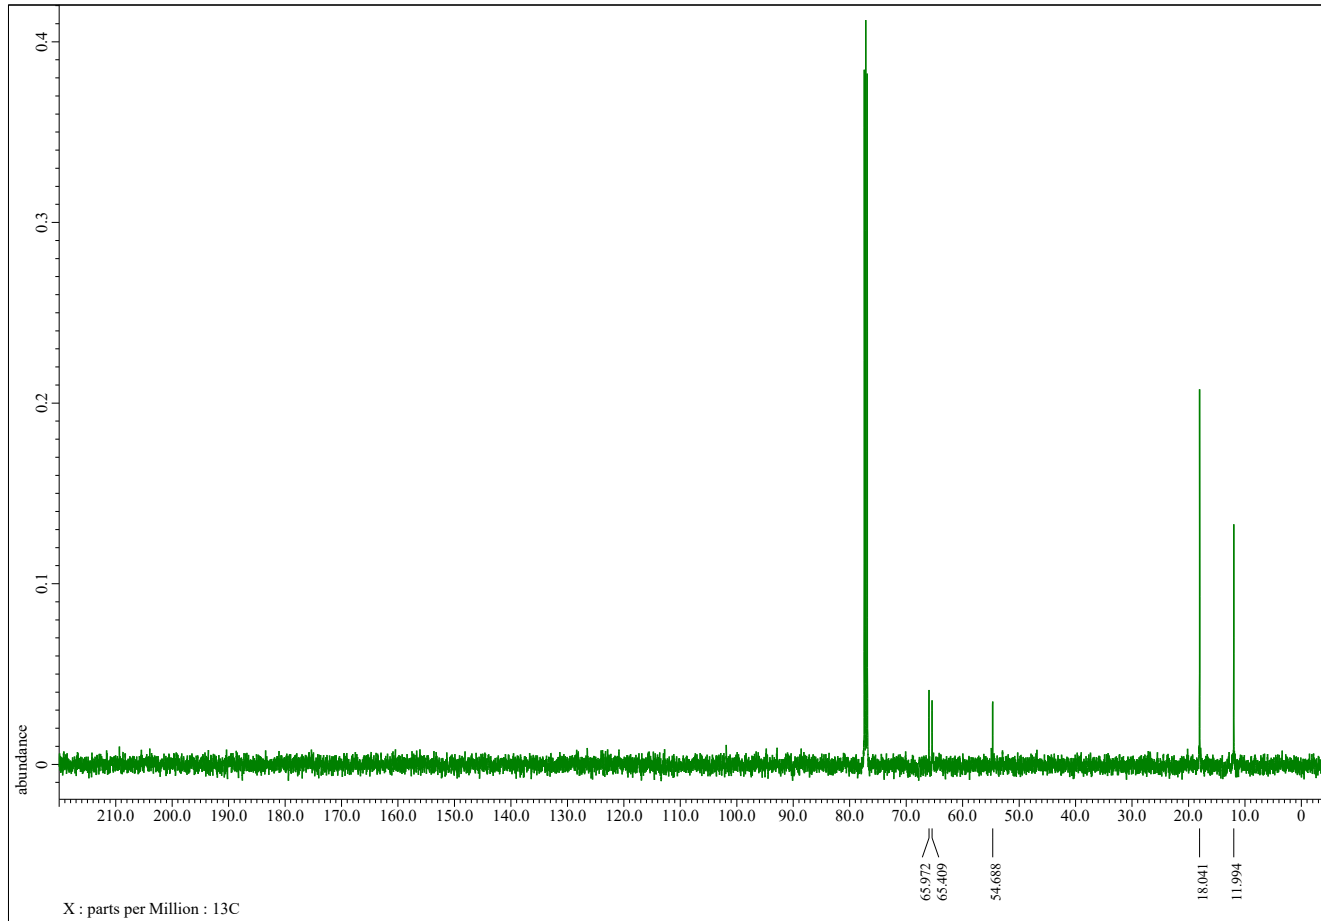

$^1\text{H}/^{13}\text{C}$  NMR spectra of azidoalcohol **13** (500/126 MHz,  $\text{CDCl}_3$ )

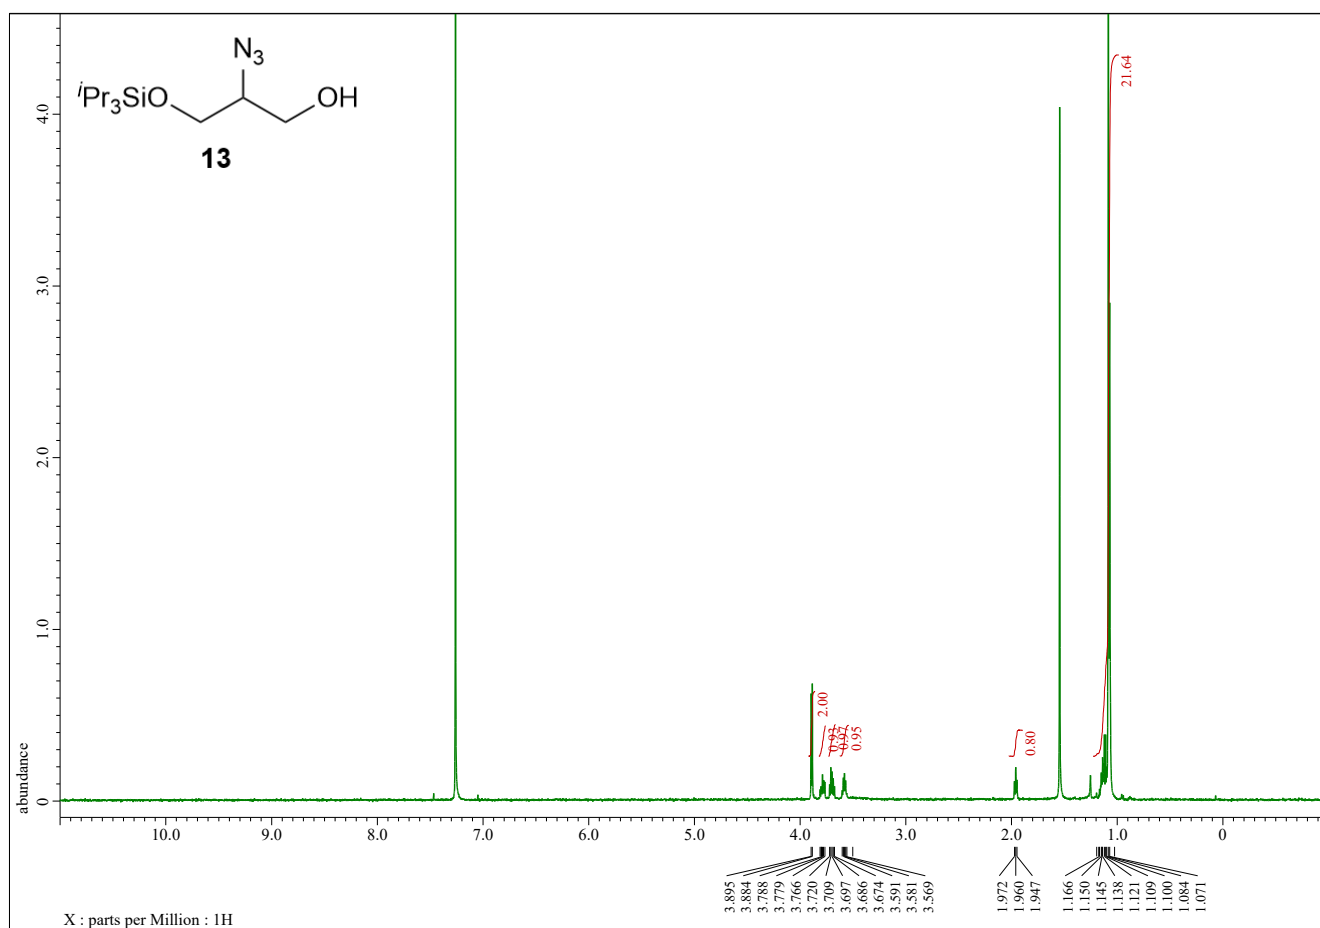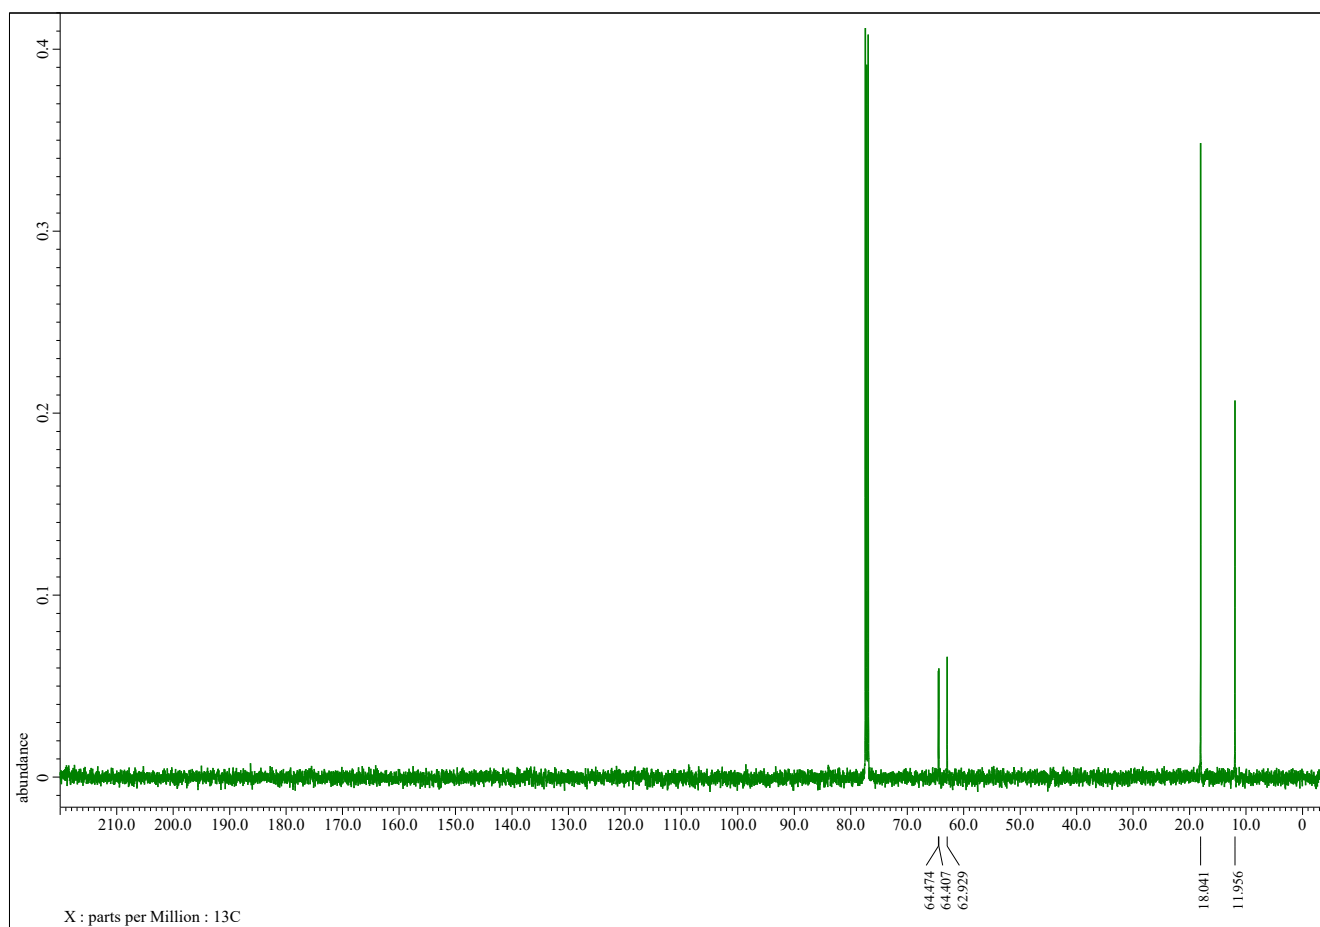

$^1\text{H}/^{13}\text{C}$  NMR spectra of tosylate **18** (500/126 MHz,  $\text{CDCl}_3$ )

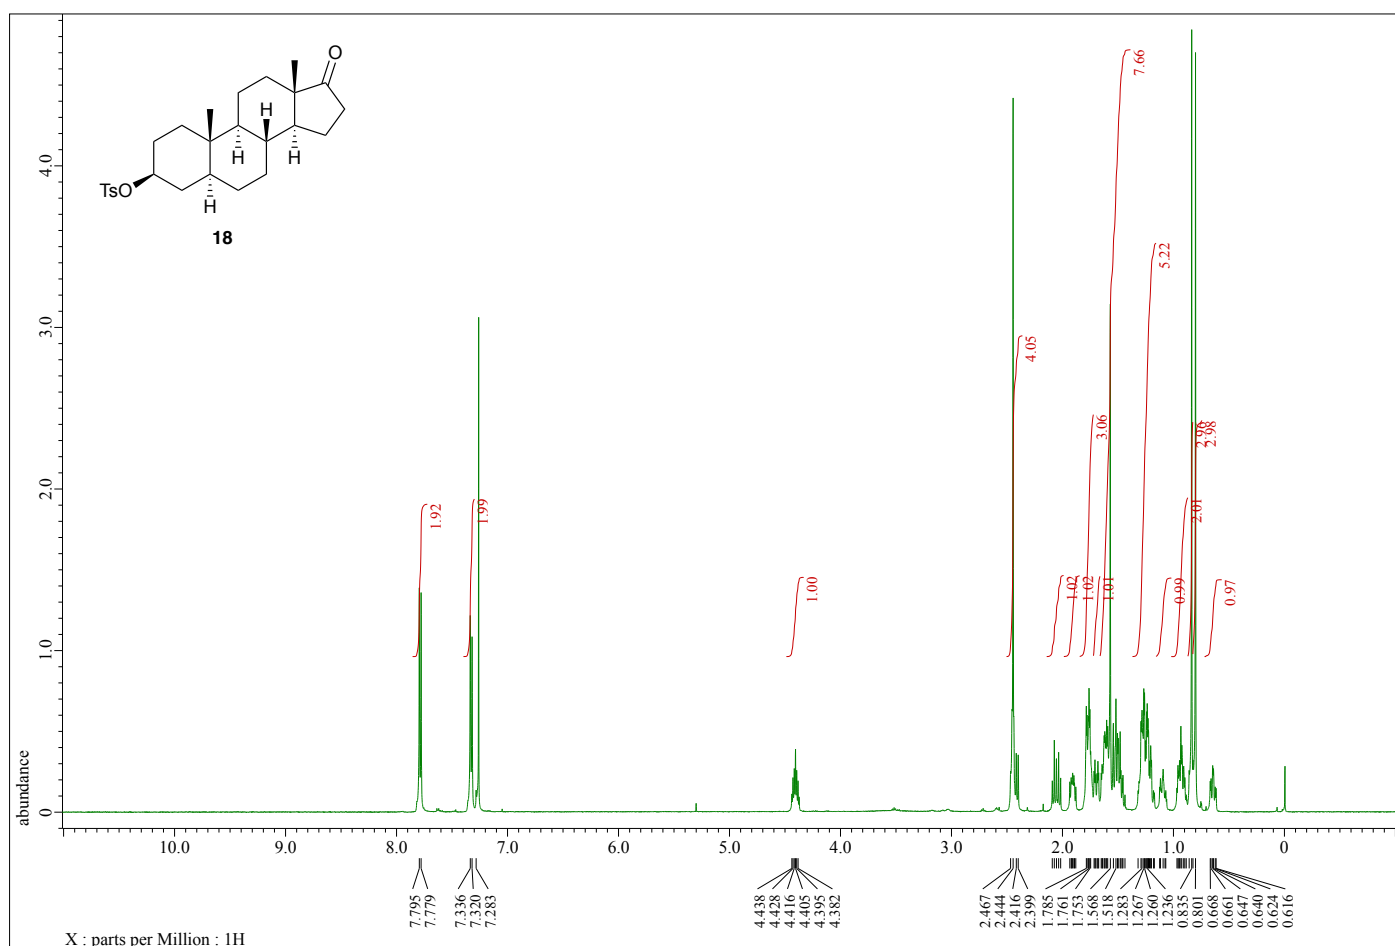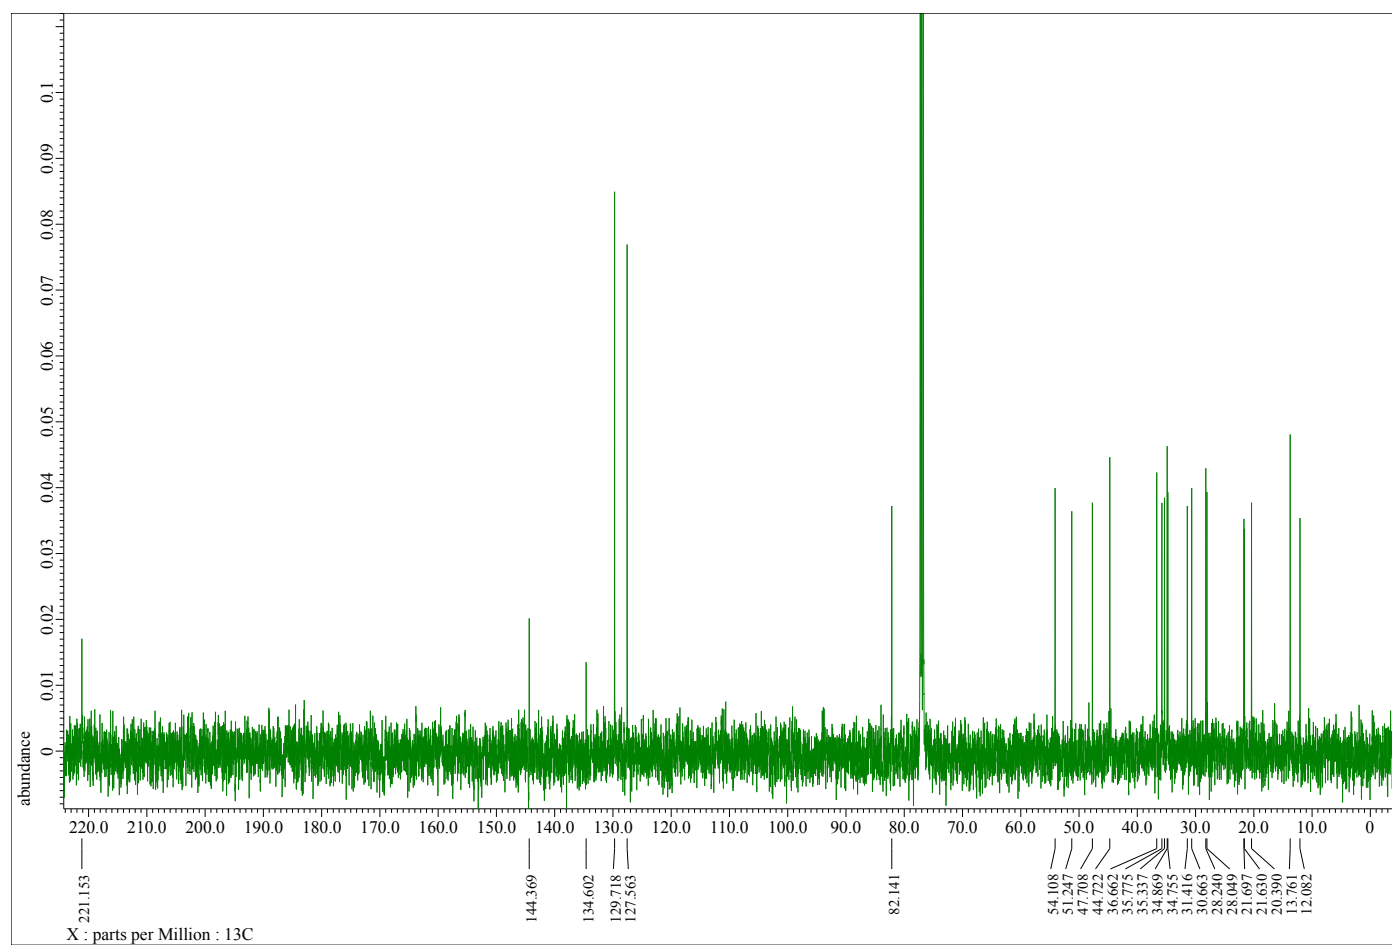



$^1\text{H}/^{13}\text{C}$  NMR spectra of androsterone **19** (500/126 MHz,  $\text{CDCl}_3$ )

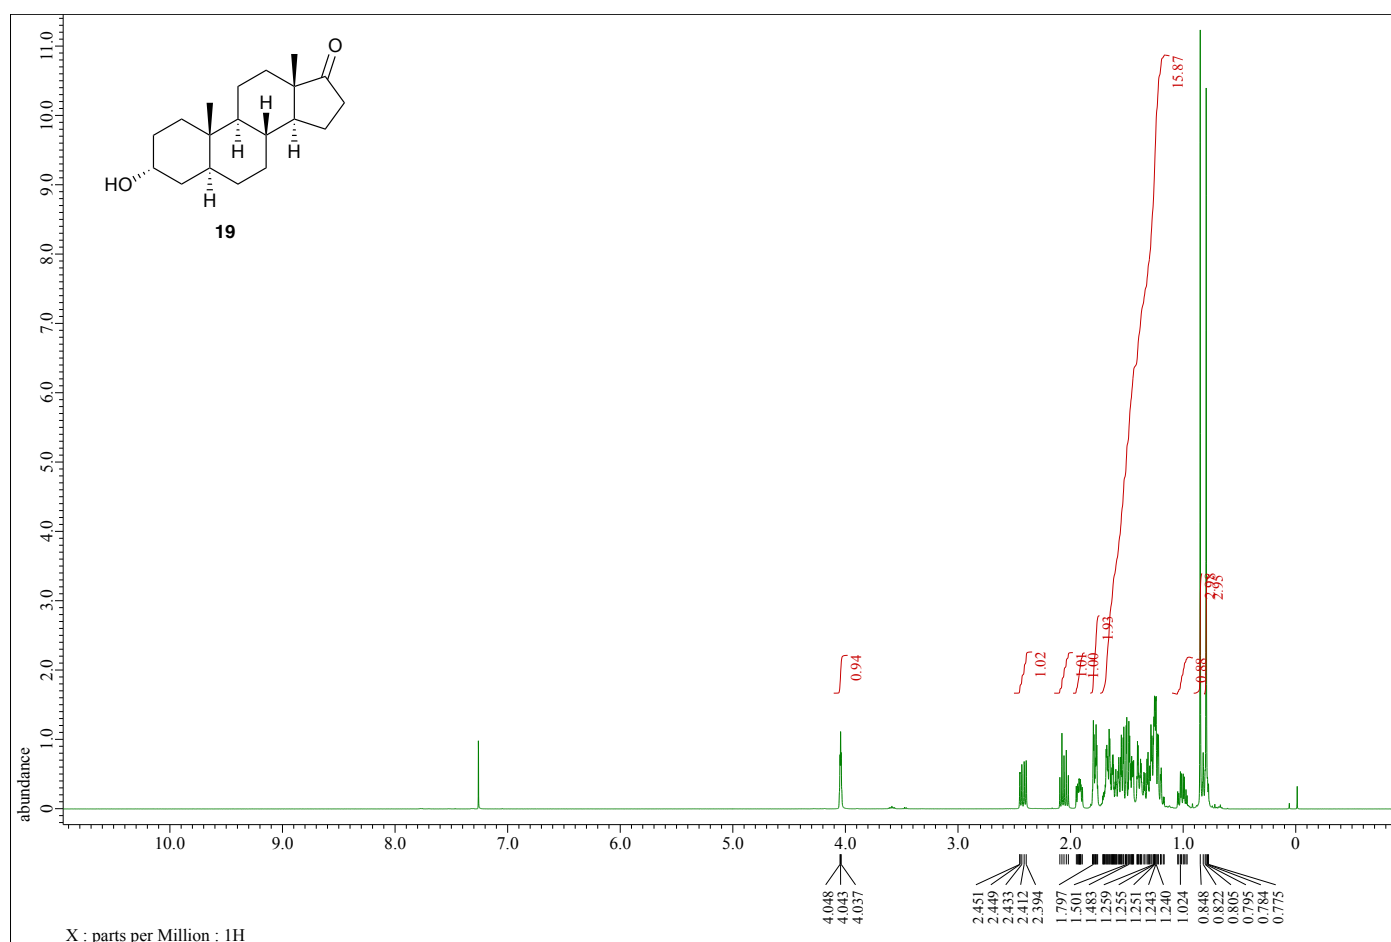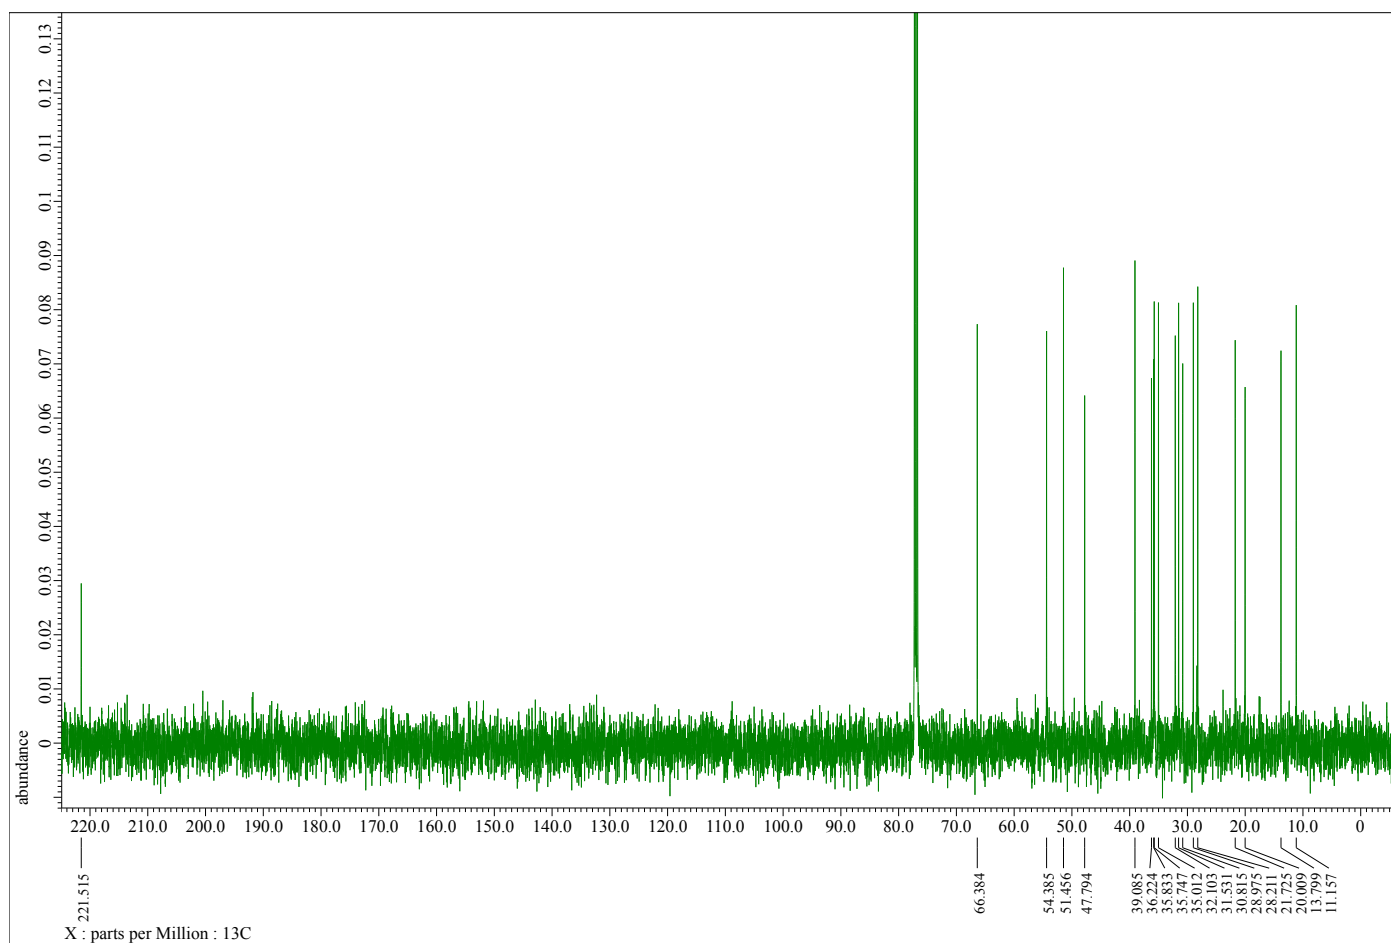

$^1\text{H}/^{13}\text{C}$  NMR spectra of bromide **20** (500/126 MHz,  $\text{CDCl}_3$ )

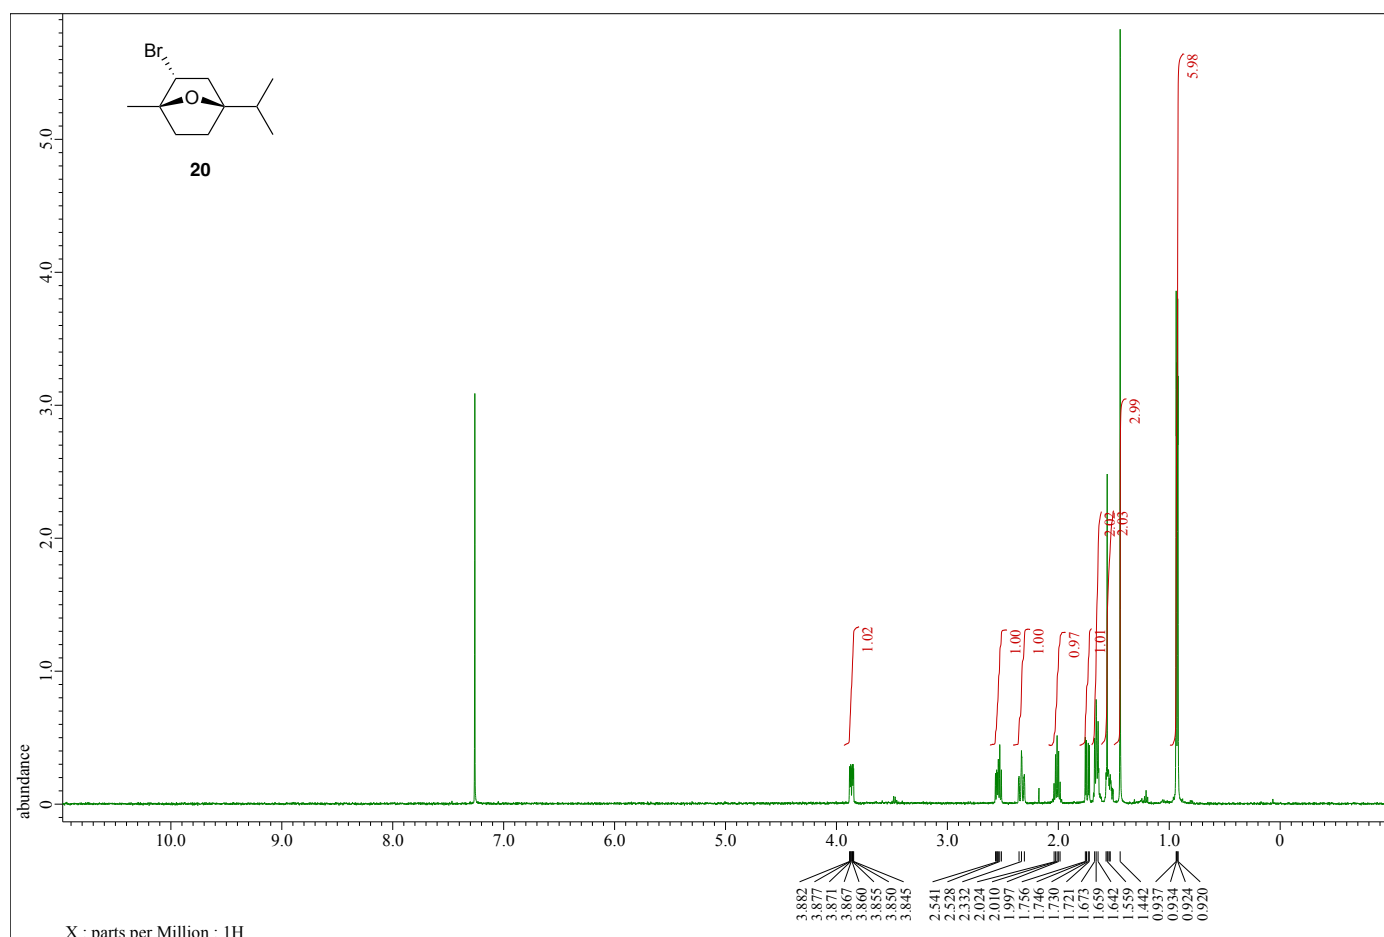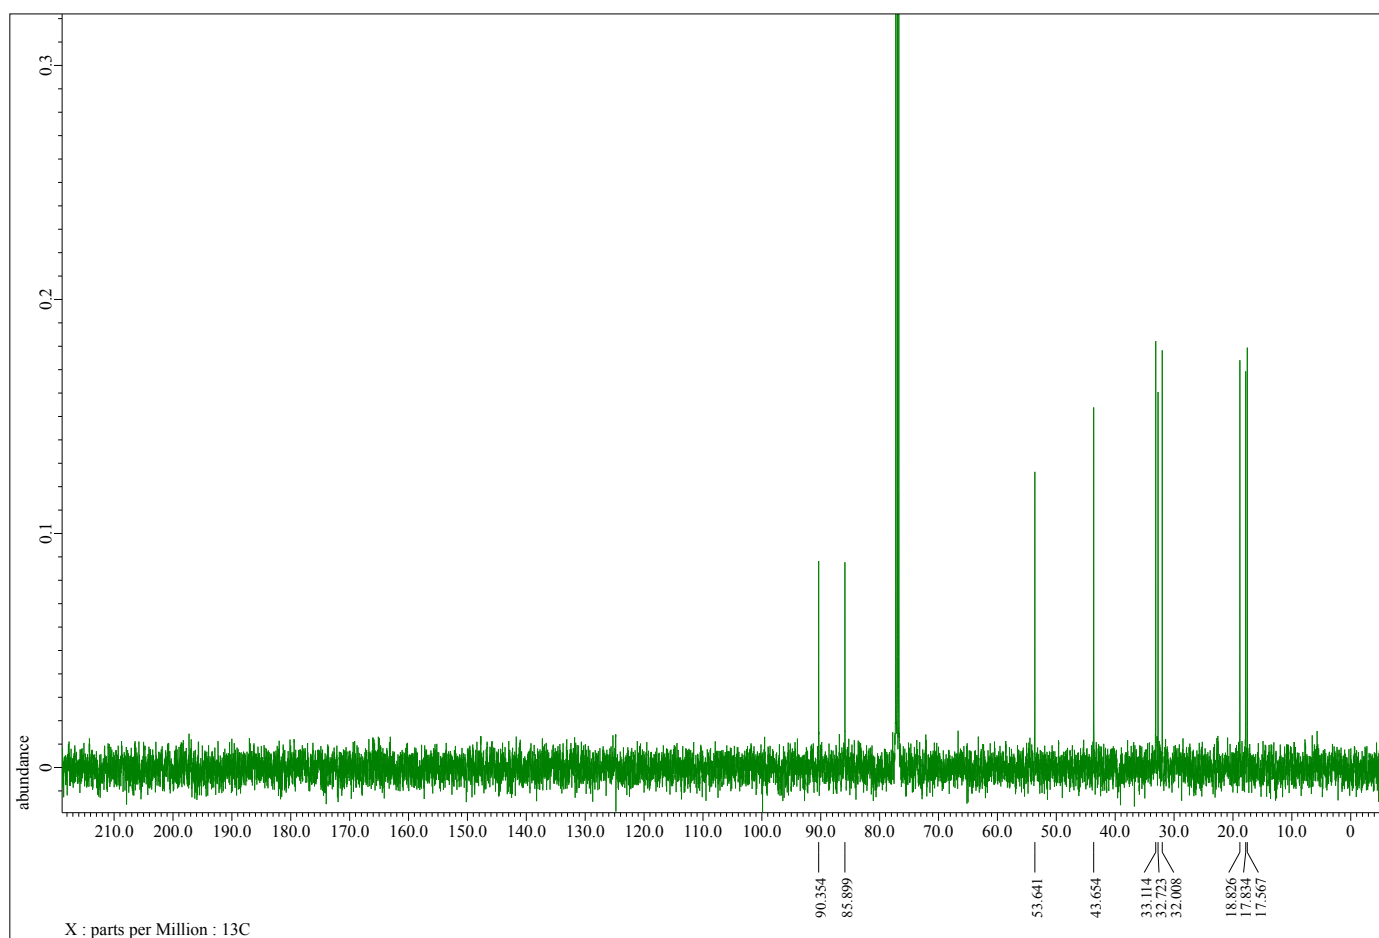

$^1\text{H}$  NMR spectrum of alcohol **21** (500 MHz,  $\text{CDCl}_3$ ) and  $^{13}\text{C}$  NMR spectrum of **21** (126 MHz,  $\text{benzene-}d_6$ )

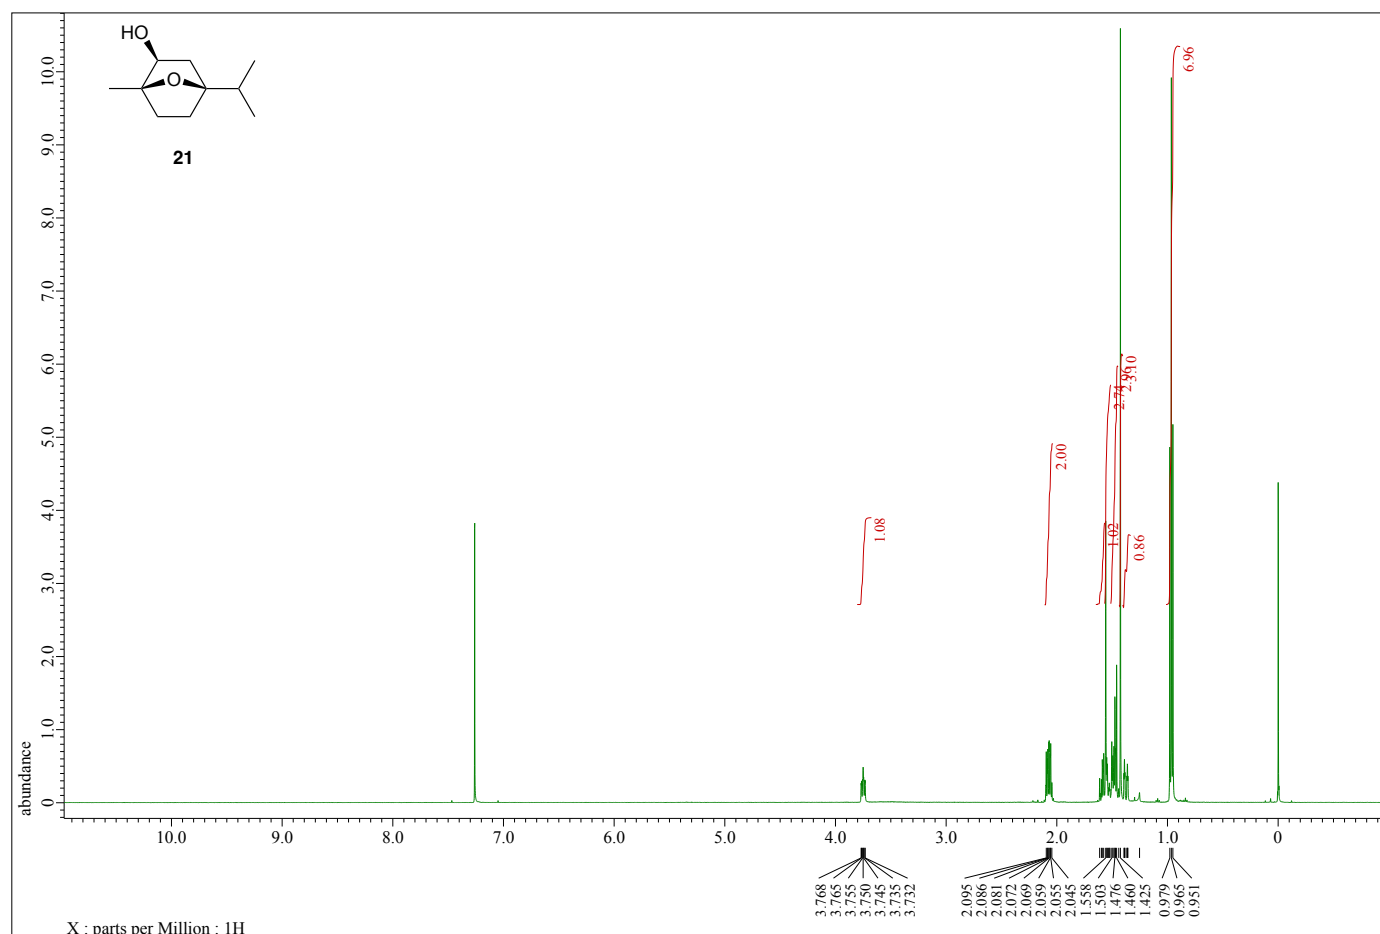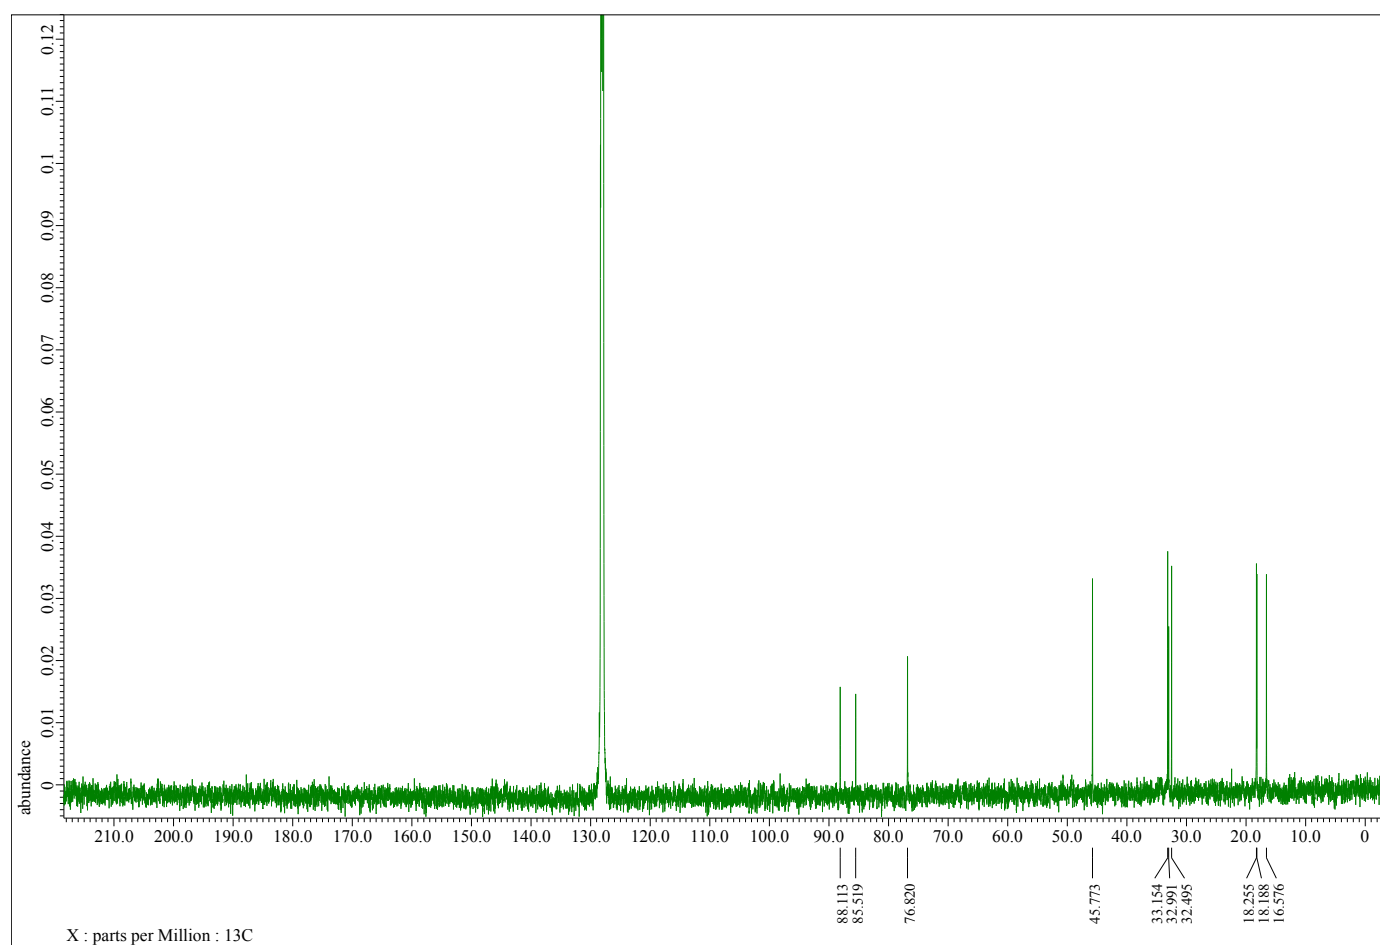

Supplement: d3ob01507f1.pdf [file d3ob01507f1.pdf]
